# Supplementary material for: The role of a decision-support smartphone application in enhancing community health volunteers’ effectiveness to improve maternal and newborn outcomes in Nairobi, Kenya: quasi-experimental research protocol
Source: PubMed Central journal article supplement — BMJ Open. 2017 Jul 20;7(7):e014896. doi: 10.1136/bmjopen-2016-014896 (PMC5642658; doi:10.1136/bmjopen-2016-014896), 2017-07-20
Supplement: bmjopen-2016-014896.draft_revisions.pdf [file bmjopen-2016-014896.draft_revisions.pdf]

# BMJ Open

**The role of a decision-support smartphone application in enhancing Community Health Volunteers' effectiveness to improve maternal and newborn outcomes in Nairobi, Kenya: a quasi-experimental research protocol**

|                                 |                                                                                                                                                                                                                                                                                                                                                                                                                                                                                                               |
|---------------------------------|---------------------------------------------------------------------------------------------------------------------------------------------------------------------------------------------------------------------------------------------------------------------------------------------------------------------------------------------------------------------------------------------------------------------------------------------------------------------------------------------------------------|
| Journal:                        | <i>BMJ Open</i>                                                                                                                                                                                                                                                                                                                                                                                                                                                                                               |
| Manuscript ID                   | bmjopen-2016-014896                                                                                                                                                                                                                                                                                                                                                                                                                                                                                           |
| Article Type:                   | Protocol                                                                                                                                                                                                                                                                                                                                                                                                                                                                                                      |
| Date Submitted by the Author:   | 25-Oct-2016                                                                                                                                                                                                                                                                                                                                                                                                                                                                                                   |
| Complete List of Authors:       | Bakibinga, Pauline; African Population and Health Research Center, Health Challenges and Systems Program<br>Kamande, Eva; African Population and Health Research Center, Health Challenges and Systems<br>Omuya, Milka; African Population and Health Research Center, Health Challenges and Systems<br>Ziraba, Abdhalah; African Population and Health Research Center, Health Challenges and Systems<br>Kyobutungi, Catherine; African Population and Health Research Center, Health Challenges and Systems |
| <b>Primary Subject Heading</b>: | Health services research                                                                                                                                                                                                                                                                                                                                                                                                                                                                                      |
| Secondary Subject Heading:      | Public health, Health informatics                                                                                                                                                                                                                                                                                                                                                                                                                                                                             |
| Keywords:                       | Decision-Support, Maternal and Newborn Health, Community Health Volunteers, Slums, Kenya                                                                                                                                                                                                                                                                                                                                                                                                                      |
|                                 |                                                                                                                                                                                                                                                                                                                                                                                                                                                                                                               |

SCHOLARONE™  
Manuscripts

1  
2  
3 **The role of a decision-support smartphone application in enhancing Community Health**  
4  
5 **Volunteers' effectiveness to improve maternal and newborn outcomes in Nairobi, Kenya: a quasi-**  
6 **experimental research protocol**  
7  
8

9  
10 **Pauline Bakibinga<sup>1\*</sup>, Eva Kamande<sup>2</sup>, Milka Omuya<sup>3</sup>, Abdhalah K Ziraba<sup>4</sup>, & Catherine**  
11 **Kyobutungi<sup>5</sup>**  
12  
13

14  
15  
16 Institutional Affiliation-Health Challenges and Systems Research Program, African Population & Health  
17 Research Center, Manga Close, Off Kirawa Road, P.O. Box 10787-00100, Nairobi, Kenya  
18  
19

20  
21  
22  
23  
24 P. Bakibinga email: [paulabak80@gmail.com](mailto:paulabak80@gmail.com)  
25  
26

27 \*Corresponding author  
28  
29  
30  
31  
32  
33  
34  
35  
36  
37  
38  
39  
40  
41  
42  
43  
44  
45  
46  
47  
48  
49  
50  
51  
52  
53  
54  
55  
56  
57  
58  
59  
60

**Abstract:****Introduction;**

Improving maternal and newborn survival remain major aspirations for many countries in the global south. Slum settlements, a result of rapid urbanization in many developing countries including Kenya, exhibit high levels of maternal and neonatal mortality. There are limited referral mechanisms for sick neonates and their mothers from the community to health care facilities with ability to provide adequate care. In this study we specifically plan to develop and assess the added value of having community health volunteers (CHVs) use smartphones to identify and track mothers and children in a bid to reduce pregnancy-related complications and newborn deaths in the urban slums of Kamukunji sub-County in Nairobi, Kenya.

**Methods and analysis;**

A quasi-experimental study. We are implementing an innovative, m-health application known as mPAMANECH which uses dynamic mobile phone and web-portal solutions, to enable CHVs make timely decisions on the best course of action in their management of mothers and newborns at community level. The application is based on existing guidelines and protocols in use by CHVs. Currently, CHVs, conduct weekly home visits and make decisions from memory or using unwieldy manual tools, and thus prone to making errors. mPAMANECH has an in-built algorithm that makes it easier, faster and more likely for CHVs to make the right management decision. We are working with a network of selected CHVs and maternity centres to pilot test the tool. To measure the impact of the intervention, baseline, midline and endline surveys will be conducted in addition to systematic monitoring and documentation. Data will be obtained through qualitative and quantitative methods.

**Ethics and dissemination.**

Ethical approval for the study was obtained from the African Medical Research Foundation. Key messages from the results will be packaged and widely disseminated through meetings, conference presentations, reports, factsheets and academic publications to facilitate uptake by policy makers.

*Keywords: Decision-Support; Community Health Volunteers, Maternal and Newborn Health; Slums; Kenya*

**Article focus**

1  
2  
3 We hypothesise that usage of a CHV decision-support module does not have an effect on  
4  
5 utilization of MNH services or MNH outcomes in informal settlements.  
6  
7

### 8 **Key messages**

9  
10 - The study's findings will generate evidence on the effectiveness of public- private partnerships in  
11  
12 improving maternal, newborn and child health services and outcomes in urban slums.  
13

14  
15 -If successful, the study will provide a model of public-private engagement for adoption by the local and  
16  
17 central governments, for under-served populations, in other developing countries.  
18  
19

### 20 **Strengths and Limitations**

21  
22  
23 - The project seeks to address a critical challenge in the health care system in a slum context:  
24  
25 identification and referral of ill mothers and newborns.  
26  
27

28  
29 - It utilises the existing CHV work tools and mobile phone technology to show how an evidence based  
30  
31 intervention can improve health outcomes at community level.  
32  
33

34  
35 -A potential harmful unintended consequence stems from the fact that CHVs are not medically trained  
36  
37 and as such could make a decision to treat at home, rather than refer (even when the system advises  
38  
39 otherwise) with possible negative health consequences for the mothers and their newborns.  
40

41  
42 -However, since the system allows health workers to access this data, they will be in-charge of following  
43  
44 up on such cases to avoid unnecessary delays and such unintended consequences.  
45  
46  
47  
48  
49  
50  
51  
52  
53  
54

## 55 **1. Introduction:**

1  
2  
3  
4  
5  
6  
7  
8  
9  
10  
11  
12  
13  
14  
15  
16  
17  
18  
19  
20  
21  
22  
23  
24  
25  
26  
27  
28  
29  
30  
31  
32  
33  
34  
35  
36  
37  
38  
39  
40  
41  
42  
43  
44  
45  
46  
47  
48  
49  
50

Improving maternal, newborn and child survival remain major aspirations for many countries in the global south. Annually, close to 300,000 women die from maternal causes, 3.3 million children are stillborn while an additional 3.3 million die within the first month of life, [1-3]. A vast majority of these deaths occur in sub-Saharan African and South Asia. Most maternal deaths are due to causes directly related to pregnancy and childbirth; unsafe abortion and obstetric complications such as severe bleeding, infection, hypertensive disorders, and obstructed labour, [1]. A small group of neonatal conditions are responsible for the high neonatal mortality, and these include: sepsis, pneumonia, birth trauma/asphyxia, congenital malformations and prematurity, [2, 4]. Most of these causes are preventable with existing cost-effective interventions. Kenya has made some progress in improving maternal and newborn survival over the years. Maternal mortality has progressively reduced from 488/100,000 to 362/100,000 between 2008/09 and 2014. Neonatal mortality has reduced from 31 to 22 deaths per 1000 live births, between 2008/9 and 2014, [5, 6]. Neonatal deaths account for about 60% of all infant deaths in Kenya, [6]. Given that the majority of maternal deaths happen during labour while most child deaths happen during the neonatal period, increasing women's access to healthcare during pregnancy and childbirth and improving the quality of intrapartum care would serve to reduce most of these preventable causes. Despite the existence and knowledge about simple strategies and techniques to reduce maternal and newborn deaths, these interventions are not up to scale due to inadequacy of health care facilities, trained personnel, information, poor referral systems and pervasive poverty.

### 51 **Community Health Volunteers**

52  
53  
54  
55  
56  
57  
58  
59  
60

The need to ensure universal health coverage amidst a global health care workers crisis saw the identification of community health volunteers (CHVs) as a critical alternative and workforce at

1  
2  
3 the community level, [7]. CHVs are volunteers identified from communities that they reside in  
4 and offered a few days' basic training based on a set curriculum before they are assigned  
5  
6 community health promotion roles. CHVs belong to established community units with a  
7  
8 responsibility of making weekly home visits to households within designated geographical areas.  
9  
10 The visits are targeted to households with pregnant women, newborns, infants and other children  
11  
12 under the age of five years. During these visits, CHVs are supposed to identify those cases that  
13  
14 need referral for preventive services, those that need medical attention, and those that need  
15  
16 simple remedies. Their work tools include many paper based registers and counselling cards that  
17  
18 they refer to in order to make management decisions. Like many other developing countries,  
19  
20 Kenya suffers a shortage of healthcare workers, [8]. CHVs were identified under Kenya's  
21  
22 Community Health Strategy as a means of alleviating the healthcare worker crisis. To date,  
23  
24 CHVs continue to bridge the critical gap between communities and the formal health system, and  
25  
26 many positive lessons have been learned in Kenya and other parts of the world, [9-11]. CHVs in  
27  
28 Kenya, like in many emerging economies, are responsible for the majority of grassroots health  
29  
30 care delivery, and as such, continue to play a very critical role in primary health care delivery.  
31  
32  
33  
34  
35  
36  
37  
38

### 39 **Decision-support systems**

40  
41 Clinical decision support (CDS) refer to tools used to improve decision-making in the patient  
42  
43 care workflow, [12]. CDS provides clinicians, staff, patients or other individuals with knowledge  
44  
45 and person-specific information, intelligently filtered or presented at appropriate times, to  
46  
47 enhance health and health care, [13, 14]. These tools include computerized alerts and reminders  
48  
49 to care providers and patients; clinical guidelines; condition-specific order sets; focused patient  
50  
51 data reports and summaries; documentation templates; diagnostic support, and contextually  
52  
53  
54  
55  
56  
57  
58  
59  
60

1  
2  
3 relevant reference information, among other tools, [15]. They are beneficial in reducing errors,  
4  
5 increasing quality of care and improving efficiency.  
6  
7

### 8 **Mobile technology for health**

9

10 Mobile technologies have the potential to bridge systemic gaps needed to improve access to and  
11 use of health services, particularly among underserved populations, [16]. Worldwide, the use of  
12 mobile and/or electronic devices to support both medical and public health practice and research  
13 (mHealth) is increasingly being appreciated. Over the last one decade, there has been global  
14 enthusiasm and interest among development agencies, researchers, and policy makers resulting  
15 in the rapid proliferation of mHealth solutions many countries. mHealth has the important role of  
16 connecting people in real time while reducing delays in health-related decision making and  
17 access to quality care, [17]. The growing coverage of mobile networks has enabled development  
18 of various mHealth initiatives especially targeted for underserved populations in developing  
19 countries, [18]. The use of mobile and electronic technology is increasingly valued in health care  
20 delivery, especially in low and middle income countries, [17-20]. The high and ever growing  
21 mobile penetration coupled with investments from technology companies that provide accessible  
22 platforms onto which innovations can establish and offer value-based products, [18]. Innovations  
23 include mobile phone platforms/applications and micro-insurance packages. Given the nature  
24 and tight timeframes of most obstetric and neonatal emergencies, which more often than not  
25 demand quick access to quality care at short notice, mobile phone innovations are a cheap and  
26 fast solution especially in areas with poor healthcare infrastructure which have shown  
27 improvements in maternal and child health outcomes, [20, 21]. The majority of innovations on  
28 the market are tailored towards promoting reproductive, maternal, and child health, [17, 22]. In  
29 addition, various projects have been designed and evaluated on CHVs use of mobile technology  
30  
31  
32  
33  
34  
35  
36  
37  
38  
39  
40  
41  
42  
43  
44  
45  
46  
47  
48  
49  
50  
51  
52  
53  
54  
55  
56  
57  
58  
59  
60

1  
2  
3 to deliver interventions, [23, 24]. Decision-support systems have been highlighted as a critical  
4  
5 factor in reducing errors in evidence-based clinical practice. For clinicians, studies have  
6  
7 demonstrated that computerized decision support systems can be used to improve compliance to  
8  
9 practice guidelines [13, 14]. Given the limited training obtained and skills that the CHVs  
10  
11 possess, coupled with the distances they work from the clinical settings mobile information  
12  
13 technologies tools enable them to provide much needed health services.  
14  
15  
16  
17  
18  
19

20 Over the last decade, more mobile and electronic information tools have been developed, tested  
21  
22 and implemented with CHVs to support their work roles. The tools help the CHVs in  
23  
24 surmounting challenges such as lack of appropriate work tools and inadequate supportive  
25  
26 supervision and training [23, 24]. These tools have been instrumental in improving access to care  
27  
28 by marginalized population groups subjected to stigma and those in hard to reach areas by  
29  
30 reducing both time and cost of travel. As such, research on CHVs' use of mHealth tools in  
31  
32 important. Several pilot projects, utilizing multiple designs and measures have been  
33  
34 implemented. The projects have reported improvements in services rendered by CHVs and the  
35  
36 related health outcomes for communities. In sub-Saharan Africa, most of the interventions have  
37  
38 demonstrated improvements in the CHVs' delivery of maternal, newborn and child health,  
39  
40 Tuberculosis and sexual and reproductive health services, among others, [21, 23]. The  
41  
42 innovations largely use SMS and hotlines enabling mothers to access vital information and  
43  
44 timely referrals as a result of better and faster communication and transport. Available evidence  
45  
46 shows the usefulness of mHealth tools in facilitation of compliance with practice guidelines and  
47  
48 process improvement, [23]. However, many of the interventions have been limited  
49  
50 methodologically by their inability to demonstrate effectiveness and or impact related to patient  
51  
52  
53  
54  
55  
56  
57  
58  
59  
60



1  
2  
3 outcomes. In addition a lack of use of nationally accepted guidelines and open source tools limits  
4 the scalability of these interventions. In addition, available literature does not provide cost  
5 estimates necessary for delivery of program targets. Furthermore, a top to bottom approach that  
6 does not incorporate the ideas of the CHVs in the development of the tools is a major  
7 impediment as successful projects use the CHVs as experts in the design and management of  
8 their interventions, [23]. The recently developed mHealth Evidence Reporting and Assessment  
9 (mERA) checklist whose aim is to assist authors in reporting mHealth-research, to guide  
10 reviewers and policymakers in synthesising high-quality evidence is expected to indirectly  
11 improve the quality of mHealth evidence in the literature, [16, 25]  
12  
13  
14  
15  
16  
17  
18  
19  
20  
21  
22  
23  
24  
25  
26  
27  
28  
29  
30  
31

32 The African Population and Health Research Center (APHRC) has implemented a health systems  
33 strengthening project, Partnership for Maternal, Newborn and Child Health (PAMANECH) in  
34 Korogocho and Viwandani informal settlements of Nairobi, Kenya, [26]. The project sought to  
35 strengthen the healthcare delivery system in the urban informal settlements to be more  
36 responsive to the health needs of mothers and their children through enhanced service delivery  
37 public-private partnerships. In a bid to improve the health management information system, an  
38 innovative mHealth application, was developed. The mPAMANECH application was developed  
39 as an integrated data capture tool running as a mobile app with selected reporting forms for  
40 CHVs in Kenya. It operates in an interconnected network of CHVs and health facilities within a  
41 defined local system. It is designed to replace the numerous paper-based forms that do not allow  
42 integration of patient data from the community to the health facility and back for better referral  
43  
44  
45  
46  
47  
48  
49  
50  
51  
52  
53  
54  
55  
56  
57  
58  
59  
60

1  
2  
3 and management of patients. This system has been seen to improve the reporting abilities of  
4  
5 CHVs as it is less cumbersome than the paper-based system and enhanced data quality as it has a  
6  
7 function that limits saving data until all necessary fields are filled in. In addition, the CHEW can  
8  
9 access a CHV's data remotely without having to wait for the end of the month for the CHV  
10  
11 summaries. The desire to improve the functionality of the existing system to include a decision  
12  
13 support function provides the basis on the new project.  
14  
15

16  
17 This project attempts to bridge this gap by incorporating CHV views, utilizing the tools approved  
18  
19 by the Ministry of Health and allowing for assessment of health outcomes in the design and  
20  
21 implementation of the project. The decision support system is developed from open source tools.  
22  
23 In addition, a cost effectiveness analysis would be conducted to inform county and national  
24  
25 implementation plans regarding the necessary investments for set up and maintenance.  
26  
27  
28  
29  
30  
31

## 32 **2. Methods and Analysis**

### 33 **Research Objectives**

34  
35 The overall objective of the proposed work is to develop and validate a decision-support  
36  
37 algorithm within a mHealth application in improving maternal and newborn health outcomes in  
38  
39 urban slums in Kamukunji sub-County in Nairobi, Kenya. The project seeks to assess the added  
40  
41 value of using a CHV decision-support module of mPAMANECH in reducing prenatal and  
42  
43 postnatal maternal complications and newborn deaths.  
44  
45  
46  
47

48 Specifically the project will assess (i) the feasibility and acceptability of using a decision-support  
49  
50 module of mPAMANECH and (ii) whether decision-support platform contributes to increase in  
51  
52 utilization of MNH services, and reduction of MNH complications and deaths. We will measure  
53  
54 several outcomes, *figure 1* related to the two specific objectives, above.  
55  
56  
57  
58  
59  
60

## Conceptual framework, Theory of Change and Operationalization

Our innovation centres around enhancing the functionality and utility of the current mPAMANECH application to include a community decision support tool to be used within a local system comprised of CHVs and five maternity centres serving five slum settlements in Nairobi. The decision-support module in the mPAMANECH application will supplement the existing MNCH data capture modules and help in the identification of high risk facing pregnant women, new mothers and newborns with complications, and to make timely and correct decisions on referral for cases that need intervention. The main beneficiaries are pregnant women (over 24 weeks), mothers in the immediate post-partum period and their newborns (up to 28 days old).

The use of CHVs in delivering the mobile phone based intervention and follow up by the SCHMT will ensure sustained support and adherence to the intervention during pregnancy, immediate postpartum and in the neonatal period. The mPAMANECH has the official 503 and 504 forms in use by CHVs and Community Health Extension Workers (CHEWs), who supervise the CHVs. A dedicated team of CHEWs will ensure that the intervention is delivered as expected and non-adherence captured and documented.

The attributes of the solution include: 1) Use of any android devices - the entire application is operable on phones, tablets or desktops/laptops; 2) Within a linked local system – messaging is delivered internally via the portal and no extra network charges are required for messaging; 3) The application is bandwidth light and takes about 100 Kenya shillings a month per user, based on local data bundle charges. The application can work offline and auto-synchronize as soon as network connectivity is re-established; 4) Updates are automated and there is no need for an IT

1  
2  
3 expert to have physical access to the device to execute a software patch or change; 5) The  
4 application has security features that protect users' confidentiality and limit access to a closed  
5 but linked local system of health facilities and CHVs with varied access rights; 6) It has the  
6 ability to limit use of other phone functionality to only allow this application to run. This helps  
7 prevent abuse of the device and promote saving on bandwidth. We aim to enhance the  
8 functionality and utility of the current mPAMANECH application to include a community  
9 decision support tool to be used within a local system comprised of selected CHVs and five  
10 maternity centres serving slum settlements in Nairobi. In the 'Operationalisation' section, we  
11 describe more on how the decision support system is expected to work.  
12  
13

14  
15 From our proposed theory of change, *figure 2*, we anticipate that the decision support module of  
16 mPAMANECH will assist the CHVs in the identification of high risk pregnant women, new  
17 mothers and newborns with complications, and to make timely and correct decisions on referral  
18 for cases that need intervention. With the improved knowledge and skills possessed by the CHVs  
19 more women and neonates in need of health care will be identified and referred to the necessary  
20 health facilities. As a result, there will be increase utilisation of maternal and neonatal health  
21 services and reduced maternal and neonatal complications and deaths.  
22  
23  
24  
25  
26  
27  
28  
29  
30  
31  
32  
33  
34  
35  
36  
37  
38  
39  
40  
41  
42  
43

#### 44 **Operationalisation of the Decision Support System**

45  
46  
47 The mobile decision support system (mDSS) mobile application (app) is an Android app that  
48 installs from the phone and runs as an application, *figure 3*. The app will be hosted at Google  
49 store and is accessible for download via the internet automatically to the user handset.  
50  
51  
52  
53  
54  
55  
56  
57  
58  
59  
60

1  
2  
3 Once installed, the handset and the application will be configured with the credentials of the  
4 CHV including username and password, which are linked with the operating phone number. This  
5 setup allows the system to register and associate collected records to the respective CHV; useful  
6 for reporting and analysis purposes.  
7  
8  
9  
10

11  
12  
13 The CHVs will be provided with a mobile phone running the mHealth App for data collection  
14 which is then relayed to the head office at APHRC Campus. When visiting households for data  
15 collection, by initiating a new record the system automatically picks the geolocation of the  
16 household and associates it with the record.  
17  
18  
19  
20  
21

22  
23 The CHV will complete the respective form and save the information at any stage on the  
24 handset. This method allows the CHV to continue collecting more information and only submit  
25 the completed form to the server over the internet. Where the handset detects that internet  
26 connectivity is not available for one reason or the other, the completed forms will be stored in the  
27 phone and only be relayed to the server when the connectivity is established. Because the  
28 application is in communication with the server in real-time, any update of the data is  
29 immediately available to the CHVs. The application is preconfigured with danger signs for both  
30 mothers and newborns as defined by the WHO. When any of the danger signs is picked by the  
31 system, the CHV is immediately prompted to refer the patient to a facility within the network.  
32  
33  
34  
35  
36  
37  
38  
39  
40  
41  
42  
43  
44

45 The system is to be set up in such a way that the CHV will not be allowed to proceed and  
46 complete the forms until the referral is done. The patient's information will be available to all the  
47 facilities within the network and he/she will be able to visit any of the networked facilities for  
48 treatment. This information is also relayed to the rest of the other facilities and a record of the  
49 visit is kept in the server. Within 24 hours if the patient has not been seen in any of the  
50  
51  
52  
53  
54  
55  
56  
57  
58  
59  
60

1  
2  
3 networked facilities, an SMS message is relayed to the respective CHV handset. At this point,  
4  
5 the CHV should follow up with the patient to inquire about their condition and whether they  
6  
7 chose to honour the referral to a facility outside the network or not.  
8  
9

10  
11 When the patient visits a facility within the network, using the household number and the name  
12  
13 he/she will be easily identified and treated. The clinician is able to record the treatment in the  
14  
15 patient's information, which is recorded in the server.  
16  
17

18  
19 Both the CHV and the clinician's information are available to a reviewer in real time from the  
20  
21 web. The reviewer's role would be to assess the CHV's reason for referral and the clinician's  
22  
23 final diagnosis for correctness. The feedback from the reviewer will be available and shared on a  
24  
25 monthly basis during review meetings. Every week, the CHEW, will randomly sample referrals  
26  
27 made by each CHV to assess their correctness. This will be compared with the 'reviewers'  
28  
29 summary.  
30  
31

### 32 33 **mDSS Solution- Key Features (*figure 4*)**

#### 34 35 **CHV (mobile App)**

36  
37 Through this app, the mDSS data collection tools are accessible on the CHV mobile handset. It  
38  
39 allows for completion and submission of the information to the mDSS Server.  
40  
41  
42  
43  
44

#### 45 46 **mDSS Server**

47  
48 A database driven web application that acts as a host for the collected information. It also has a  
49  
50 web interface for data manipulation by the facility healthcare worker(s) and reviewer.  
51  
52

53  
54 The mDSS server application incorporates an application logic component that connects with the  
55  
56 SMS and email gateways. This allows for real-time communication of certain critical indicators  
57  
58

1  
2  
3 to the respective recipients. For example, where a patient has not shown up at the referred  
4  
5 facility, the CHV will be alerted.  
6  
7

### 8 9 **Facility (web access)**

10  
11 This module is accessible at the facility via the web. The application allows the clinician to treat  
12  
13 the patient and record the treatment. The facility portal is accessible by facility staff to manage  
14  
15 referrals. The “Messages” to alert the CHVs are to be integrated with WhatsApp for effective  
16  
17 message delivery over the same mobile phone.  
18  
19

### 20 21 22 **Reviewer (web access)**

23  
24 This module is also accessible via the web, and provides the reviewer a view to assess both the  
25  
26 CHV referral report and the clinician’s diagnosis. It is based on this analysis that a decision is  
27  
28 measured.  
29  
30

### 31 32 33 **Null hypothesis:**

34  
35 Usage of a CHV decision-support module does not have an effect on utilization of MNH services  
36  
37 or MNH outcomes.  
38  
39

### 40 41 **Study Design and Sampling Strategy**

#### 42 43 a. **Study Design**

44  
45 To answer the question on effect of the decision support system, we will use a quasi-  
46  
47 experimental design with pre and post assessments to determine the impact, if any, on the MNH  
48  
49 services and selected health indicators.  
50

51  
52 We will work with three community units (CUs) from which a group of 50 CHVs will serve as  
53  
54 the intervention group. Three CUs in Embakasi sub-County, with 50 CHVs will serve as the  
55

1  
2  
3 control. The CUs in the control group will be geographically distant from the intervention site to  
4 limit contamination. The control group will be facilitated within the normal standard of practice  
5 which includes paper-based reporting. The idea is to compare access to MNH services, referral  
6 practices and MNH outcomes between those with a decision-support tool with those working  
7 with traditional paper-based tools.  
8  
9  
10  
11  
12  
13

14  
15  
16  
17 We will conduct a baseline survey and an end-line at least one year after the full implementation  
18 of the intervention. The control group will be assessed at the same time as the surveys are being  
19 conducted in the intervention group. To strengthen the case for causal inference we will also do  
20 a systematic monitoring and documentation of the intervention based on our theory of change.  
21  
22  
23  
24  
25  
26  
27 The monitoring and documentation will also capture any other contextual factors that may  
28 influence the same outcomes as our intervention.  
29  
30

31  
32 To answer the question on feasibility, we will conduct a mixed methods assessment of the CHVs  
33 and CHEWs. Qualitative assessments of their current work experiences with the paper based  
34 system as well as after the introduction of the mobile based system will be conducted. We will  
35 assess ease of use, challenges experienced and opportunities for improvement. These will be  
36 triangulated with their HMIS reports (paper and electronic).  
37  
38  
39  
40  
41  
42

#### 43 **b. Study Setting**

44  
45  
46 The intervention site covers informal settlements in Kamukunji sub County, which, like other  
47 slums, are characterized by poverty, poor coverage of social services and poor health outcomes.  
48  
49 We will identify CUs and 5 facilities that serve the CUs. Embakasi sub-County will serve as the  
50 control site. We will identify three CUs to serve as controls.  
51  
52  
53  
54

#### 55 **c. Sampling**



1  
2  
3 The CUs in the intervention group will be purposively selected based on discussions with the  
4 sub-County community strategy coordinator for Kamukunji. We will select CUs with the worst  
5 health indicators for both the intervention and control groups, including those serving informal  
6 settlements, and with more likelihood to benefit from the intervention.  
7  
8  
9

10  
11  
12 For the population based surveys:

13  
14  
15 ➤ **Quantitative study**

16  
17  
18 ▪ *Study population*

19  
20 The project will target households with women of reproductive age (15-49 years) in the informal  
21 settlements of Kamukunji. It will also target health care providers in five selected health facilities  
22 as well as the sub-County Health Management teams of Kamukunji, Embakasi, Makadara and  
23 Nairobi City County.  
24  
25  
26  
27

28  
29 A quantitative survey will be conducted focussing mainly on maternal and newborn health and  
30 family planning services.  
31  
32

33  
34 ▪ *Sample size estimation*

35  
36 The key outcome of interest is correct referral practices. Using proportion of neonates with at  
37 least one danger sign referred by CHVs as the indicator, since it is representative of the target  
38 population, the total sample size for each group has been estimated as 173 (346 in total). Using a  
39 difference in proportion 13.3 % for neonates with danger signs referred (rising from 16.7 to  
40 30%), at 95% CI for 80% power and sample proportions of 50% in the intervention and 40% in  
41 the control groups, respectively, we came up with a sample size of 315. Accounting for a  
42 potential non-response rate of 10% based on previous studies in similar study populations, the  
43 effective sample size is 346. Using correct decisions made by CHVs (one of the indicators to be  
44 measured), the sample size was estimated as 199. 346 is therefore an appropriate sample size.  
45  
46  
47  
48  
49  
50  
51  
52  
53  
54  
55  
56

1  
2  
3       ▪ *Sampling procedure*  
4

5  
6 To measure feasibility and acceptability, all the CHVs in the intervention site will be assessed, in  
7  
8 addition to an audit of the functionality of the system. We will measure the percentage time for  
9  
10 which the system is down on a monthly basis (**Numerator:** Number of times (in minutes) when  
11  
12 the system is down. **Denominator:** Total active time in a month. Down time defined as 30  
13  
14 minutes of hanging and Active time as time without hitches), proportion of CHVs effectively  
15  
16 using the decision support system (Within the system, on a quarterly basis we will be able to  
17  
18 generate reports on decisions, correct or otherwise, made by the CHVs. These will also be  
19  
20 compared to the control site that will only have a paper based system of data collection), and the  
21  
22 experiences of the CHVs and the mothers with the mobile based system. These will be compared  
23  
24 to the investment.  
25  
26  
27  
28  
29

30  
31 To answer the question on effect of the system on utilisation of services, the data above will be  
32  
33 triangulated with data from the **mPAMANECH application which already has an integrated**  
34  
35 **data collection module**, the data generated by the CHVs and participating health facilities will  
36  
37 be retrieved, cleaned and analyzed to derive estimates of the main outcome of interest – correct  
38  
39 referral practices. In addition, these data will be triangulated with other sources such as the CHV  
40  
41 monthly reports and health facility HMIS. A system of random numbers generated using STATA  
42  
43 will be used to select the respondents based on a sampling frame that is going to be informed by  
44  
45 an updated household register in the selected community units.  
46  
47  
48  
49

50       ➤ **Qualitative study**  
51

52  
53 We will use focus group discussions (FGDs) and in-depth interviews among the direct project  
54  
55 beneficiaries and CHVs, and key informant interviews with key actors (sCHMTs, health  
56  
57  
58  
59  
60

1  
2  
3 providers, CHVs and community leaders). Participants will be purposively selected to represent  
4  
5 the different stakeholders as well as different health service user categories (users and non-  
6  
7 users).  
8  
9

10 Data from the quantitative survey will be used to identify women who have or not used specific  
11  
12 MNH services and these will be approached to participate in the focus group discussions or in-  
13  
14 depth interviews. Other respondents will be identified based on their position in the community  
15  
16 and their role in the project.  
17  
18  
19

## 20 21 22 **Data Collection, Management and Analysis**

23  
24 Data collection:

25  
26 We will conduct a baseline survey and an end-line at least one year after the full implementation  
27  
28 of the intervention. The control group will be assessed at the same time as the surveys are being  
29  
30 conducted in the intervention group. To strengthen the case for causal inference we will also do  
31  
32 a systematic monitoring and documentation of the intervention based on our theory of change.  
33  
34 The monitoring and documentation will also capture any other contextual factors that may  
35  
36 influence the same outcomes as our intervention. The effects and impact of the project will be  
37  
38 determined by triangulating data and information from different sources, examining trends where  
39  
40 possible, and trying to find and support explanations for the observed findings.  
41  
42  
43  
44

45 Our key data sources will be the following: household surveys, routine HMIS data and  
46  
47 qualitative assessments (interviews and focus group discussions).  
48  
49

50 We will conduct simple and multiple logistic regression analyses comparing differences in the  
51  
52 proportions of women in reproductive age and children under-five at baseline and end line for  
53  
54 variables like antenatal coverage, vaccination coverage, skilled birth attendance, among others,  
55  
56

1  
2  
3 (See figure 1 for key indicators). These analyses will control for any differences in the samples  
4  
5 (if any) at the two time points as well as the contribution of contextual factors that may have  
6  
7 occurred in the course of the implementation.  
8  
9

10  
11  
12 mPAMANECH data: Descriptive data in terms of referrals by, diagnostic decisions, among  
13  
14 others, will be summarised using means and standard deviations for the parametric continuous  
15  
16 data and medians with inter-quartile ranges for the non-parametric data. Categorical data such as  
17  
18 referrals by age and gender will be summarised using proportions and percentages.  
19  
20

21  
22 Qualitative data: Qualitative data will be transcribed and saved in Word format. Transcribed  
23  
24 word files will be imported into NVIVO software (QSR International Pty Ltd) for coding and  
25  
26 further analysis. Analysis across all transcripts will be conducted using a constant comparative  
27  
28 method to identify themes and their repetitions and variations. The analysis will also aim to  
29  
30 identify changes (if any) in various indicators that could be attributed to the intervention.  
31  
32  
33

### 34 **3. Ethics and Dissemination**

35  
36 The study was reviewed internally by APHRC's internal scientific review committee. Ethical  
37  
38 approval for the project was obtained from the African Medical Research Fund's Ethical and  
39  
40 Scientific Review Committee (AMREF-ESRC P279/2016). The research team has undergone the  
41  
42 NIH training on protecting human research participants. We shall seek informed consent from all  
43  
44 study participants. All survey data will be collected in privacy and will be treated with  
45  
46 confidentiality. It will be made clear to participants from the onset that participation in the study  
47  
48 is voluntary and that they may choose to withdraw from the study at any time and for whatever  
49  
50 reasons without fear of penalty. The mPAMANECH datasets will be available to users (CHVs,  
51  
52 clinicians, CHEWs, among others) based on assigned, but limited, rights to protect the identity of  
53  
54  
55  
56  
57  
58  
59  
60

1  
2  
3 study participants. Only the core research team will have access to all of this information. The  
4  
5 entire dataset will be stored in the APHRC server.  
6  
7  
8  
9

10 The potential risks for study participants are limited to (i) data breaches ii) time spent on the  
11 interview and (iii) discomfort experienced due to particular questions that respondents may  
12 perceive as upsetting or personal. These potential risks will be carefully explained to each  
13 participant during the process of obtaining informed consent.  
14  
15  
16  
17  
18

19 For the data collected on the phones and computers, once it is saved the data is relayed in real  
20 time to the APHRC server and no information is saved on the phone or the computer. The users  
21 will only be able to see summary data, without the participants' details. To further minimise the  
22 risk attached to data breaches following the loss of a smartphone, each phone will have a 4-digit  
23 pass code to enable the CHVs log into the phone. This code will become active after 3 minutes  
24 on non-use. The third level of security is the username and password on each device.  
25  
26  
27  
28  
29  
30  
31  
32  
33  
34  
35

### 36 Plan for Communicating Findings of the Study:

37 Results obtained through this study will be made available to those who contributed information;  
38  
39 the communities of Kamukunji and Embakasi. In addition,  
40  
41  
42

- 43 i. The study team will conduct one major dissemination workshop in Kenya to share  
44 research findings with development partners, local NGOs, healthcare providers, activists,  
45 media houses, health professional societies, and policymakers.  
46  
47  
48
- 49 ii. Findings of the study will be shared at local and international conferences with  
50 researchers and policy makers.  
51  
52  
53
- 54 iii. We also expect to publish 3 peer-reviewed articles in Open Access scientific journals.  
55  
56  
57  
58  
59  
60

- 1  
2  
3 iv. The Policy Engagement and Communications (PEC) unit at APHRC will also use the  
4 findings of this study to produce policy briefs, fact sheets, and working papers, as well as  
5 newsletters, which will be shared with a wide range of stakeholders.  
6  
7  
8  
9  
10 v. The findings of the study will also be shared through APHRC's website.  
11  
12  
13  
14  
15  
16  
17  
18  
19  
20  
21

#### 22 4. Discussion 23 24 25

26 Maternal and neonatal health are both national and global priorities given that maternal and  
27 neonatal health indicators have not appreciably improved over the Millennium Development  
28 Goals life-span. They remain aspirations in the Sustainable Development agenda. CHVs are a  
29 critical component of the health workforce bridging the gap between communities and the formal  
30 health system. They not only improve coverage and access to basic health services but are also  
31 usually available in locations where and at times when formal health services are unavailable or  
32 inadequate. Quality healthcare is largely supported by quality data. Kenya still faces challenges  
33 with its Health Management Information System. Inaccurate data as a result of poor  
34 documentation impair the country's planning processes. This project accords APHRC and its  
35 partners an opportunity to utilize funds that have been identified to respond to Kenya's needs; to  
36 improve maternal and newborn health.  
37  
38  
39  
40  
41  
42  
43  
44  
45  
46  
47  
48  
49  
50

51 The next steps of the project if the experiments under this grant are successful will include  
52 sharing the findings with the Nairobi City County and the funder and agreeing on the next phase  
53  
54  
55  
56  
57  
58  
59  
60

1  
2  
3 of implementation. The Ministry of Health, Nairobi, is keen to roll out the system county-wide  
4  
5 subject to availability of funding. The project team will work with the consortium to generate  
6  
7 evidence to support decision-making at whatever stage of implementation. These may include  
8  
9 effectiveness in reducing adverse maternal and neonatal outcomes at national level, cost-  
10  
11 effectiveness, process issues such as CHV motivation and efficiency among others.  
12  
13

14  
15 Potential impediments to the intervention include possible technology failure, loss of equipment  
16  
17 (phones) and CHV turnover; all of which could require revisions and adaptations in the work  
18  
19 plan (e.g., quality assurance, insurance, and training). A potential harmful unintended  
20  
21 consequence stems from the fact that CHVs are not medically trained and as such could make a  
22  
23 decision to treat at home, rather than refer (even when the system advises otherwise) with  
24  
25 possible negative health consequences for the mothers and their newborns. However, since the  
26  
27 system allows health workers to access this data, they will be in-charge of following up on such  
28  
29 cases to avoid unnecessary delays and such unintended consequences.  
30  
31  
32  
33  
34  
35

## 36 **5. Conclusion**

37  
38  
39 The study outlined in this protocol will assess the added value of using a CHV decision-support  
40  
41 module of mPAMANECH in reducing maternal complications and newborn deaths in the  
42  
43 informal settlements of Nairobi, Kenya. The study's findings will contribute to the body of  
44  
45 knowledge on the effectiveness of mHealth innovations in improving maternal, newborn and  
46  
47 child health services and outcomes in urban informal settlements. Successful execution of the  
48  
49 protocol will generate evidence on the effectiveness, if any, of the system. Based on the positive  
50  
51 lessons learned, this project will provide a system for adoption by the local and central  
52  
53 governments, for resource limited communities.

## 54 **6. Competing interests statement:**

1  
2  
3 None declared.  
4  
5

6 **7. Authors' contributions:**  
7

8 PB, CK, EK, AKZ conceived the project and its design and participated in refining the manuscript. MO  
9 contributed to the refining of the design. PB drafted the manuscript. All authors read and approved the  
10 final manuscript.  
11  
12

13 **8. Funding statement:**  
14

15 This project is supported by the County Innovation Challenge Fund for Kenya (GR: CICF-INN-R2-088).  
16 The funder had no role in the decision to write and publish this protocol.  
17  
18  
19

20 **9. References:**  
21

- 22 1. Say, L., et al., *Global causes of maternal death: a WHO systematic analysis*. The Lancet Global  
23 Health, 2014.
- 24 2. Liu, L., et al., *Global, regional, and national causes of child mortality: an updated systematic  
25 analysis for 2010 with time trends since 2000*. The Lancet, 2012. **379**(9832): p. 2151-2161.
- 26 3. WHO, *Neonatal and Perinatal Mortality: Country, Regional and Global Estimates*. 2006, World  
27 Health Organization: Geneva.
- 28 4. Jehan, I., Harris, H., Salat, S., Zeb, A., Mobeen, N., Pasha, O., McClure, M. E., Moore, J.,  
29 Wright, L. L., & Goldenbergd, R. L, *Neonatal mortality, risk factors and causes: a prospective  
30 population-based cohort study in urban Pakistan.*" Bull World Health Organ, 2009. **87**(2): p.  
31 130-138.  
32
- 33 5. KNBSandICFMacro, *Kenya Demographic and Health Survey 2008-09 2010*, Kenya National  
34 Bureau of Statistics (KNBS) and ICF Macro: Calverton, Maryland.
- 35 6. KNBS, *Kenya Demographic and Health Survey 2014*. 2015, Kenya National Bureau of Statistics  
36 (KNBS): Nairobi, Kenya.
- 37 7. Lehmann, U. and D. Sanders, *Community health workers: what do we know about them*. The state  
38 of the evidence on programmes, activities, costs and impact on health outcomes of using  
39 community health workers. Geneva: World Health Organization, 2007: p. 1-42.
- 40 8. Adano, U., *The health worker recruitment and deployment process in Kenya: an emergency  
41 hiring program*. Human Resources for Health, 2008. **6**(1): p. 19.
- 42 9. Christopher, J.B., et al., *Thirty years after Alma-Ata: a systematic review of the impact of  
43 community health workers delivering curative interventions against malaria, pneumonia and  
44 diarrhoea on child mortality and morbidity in sub-Saharan Africa*. Hum Resour Health, 2011.  
45 **9**(1): p. 27.
- 46 10. Gilmore, B. and E. McAuliffe, *Effectiveness of community health workers delivering preventive  
47 interventions for maternal and child health in low-and middle-income countries: a systematic  
48 review*. BMC Public Health, 2013. **13**(1): p. 847.
- 49 11. Mumbo, H.M., et al., *Uptake of task shifting as a community strategy in Kenya*. European  
50 Scientific Journal, 2013. **9**(14).
- 51 12. Berner, E.S., *Clinical decision support systems*. 2007: Springer.
- 52 13. Kawamoto, K., et al., *Improving clinical practice using clinical decision support systems: a  
53 systematic review of trials to identify features critical to success*. Bmj, 2005. **330**(7494): p. 765.  
54  
55  
56  
57  
58  
59  
60



14. Garg, A.X., et al., *Effects of computerized clinical decision support systems on practitioner performance and patient outcomes: a systematic review*. *Jama*, 2005. **293**(10): p. 1223-1238.
15. Bates, D.W., et al., *Ten commandments for effective clinical decision support: making the practice of evidence-based medicine a reality*. *Journal of the American Medical Informatics Association*, 2003. **10**(6): p. 523-530.
16. Agarwal, S., et al., *Guidelines for reporting of health interventions using mobile phones: mobile health (mHealth) evidence reporting and assessment (mERA) checklist*. *bmj*, 2016. **352**: p. i1174.
17. Blaya, J.A., H.S. Fraser, and B. Holt, *E-health technologies show promise in developing countries*. *Health Affairs*, 2010. **29**(2): p. 244-251.
18. Vodafone, *Connected Worker: How mobile technology can improve working life in emerging economies*  
[http://www.vodafone.com/content/dam/sustainability/pdfs/vodafone\\_connected\\_worker.pdf](http://www.vodafone.com/content/dam/sustainability/pdfs/vodafone_connected_worker.pdf), 2015.
19. Lucas, H., *Information and communications technology for future health systems in developing countries*. *Social Science & Medicine*, 2008. **66**(10): p. 2122-2132.
20. Lund, S., et al., *Mobile phone intervention reduces perinatal mortality in zanzibar: secondary outcomes of a cluster randomized controlled trial*. *JMIR mHealth and uHealth*, 2014. **2**(1): p. e15.
21. Noordam, A.C., et al., *Improvement of maternal health services through the use of mobile phones*. *Tropical Medicine & International Health*, 2011. **16**(5): p. 622-626.
22. Free, C., et al., *The effectiveness of mobile-health technology-based health behaviour change or disease management interventions for health care consumers: a systematic review*. *PLoS med*, 2013. **10**(1): p. e1001362.
23. Braun, R., et al., *Community health workers and mobile technology: a systematic review of the literature*. *PloS one*, 2013. **8**(6): p. e65772.
24. Källander, K., et al., *Mobile health (mHealth) approaches and lessons for increased performance and retention of community health workers in low-and middle-income countries: a review*. *Journal of medical Internet research*, 2013. **15**(1): p. e17.
25. Tomlinson, M., et al., *Scaling up mHealth: where is the evidence?* *PLoS Med*, 2013. **10**(2): p. e1001382.
26. Bakibinga, P., et al., *The effect of enhanced public-private partnerships on Maternal, Newborn and child Health Services and outcomes in Nairobi-Kenya: the PAMANECH quasi-experimental research protocol*. *BMJ open*, 2014. **4**(10): p. e006608.

Figure 1, Key Outcomes:

| Domain of Inquiry                                                                                                | Key Outcome Indicators                                                                                                                                                                                                                                                                                                                                                                                                                                                                                                                                                                                                                                                                           |
|------------------------------------------------------------------------------------------------------------------|--------------------------------------------------------------------------------------------------------------------------------------------------------------------------------------------------------------------------------------------------------------------------------------------------------------------------------------------------------------------------------------------------------------------------------------------------------------------------------------------------------------------------------------------------------------------------------------------------------------------------------------------------------------------------------------------------|
| Assess the feasibility and acceptability of using a decision-support module of mPAMANECH                         | <ul style="list-style-type: none"> <li>- Percentage time for which the system is down on a monthly basis</li> <li>- Number of CHVs effectively using the decision support tool</li> <li>- Proportion of CHVs able to identify at least 4 danger signs among neonates</li> <li>- Proportion of CHVs able to identify at least 2 post-partum complications</li> <li>- Percentage of correct referral decisions by CHVs for post-partum mothers with complications</li> <li>- Percentage of correct referral decisions by CHVs for neonates with danger signs</li> <li>- Proportion of pregnant women referred for ANC by CHVs</li> <li>- Proportion of mothers referred for PNC by CHVs</li> </ul> |
| Determine the decision-support platform's effect on utilization of MNH services and MNH complications and deaths | <ul style="list-style-type: none"> <li>- Proportion of women attending at least 4 ANCs</li> <li>- Proportion of all mothers attending at least 2 PNCs</li> <li>- Proportion of deliveries assisted by trained personnel</li> <li>- Percentage of women who accessed first ANC within the 1st trimester</li> <li>- Proportion of women referred for post-partum family planning</li> <li>- Proportion of newborns with at least one danger sign referred by CHVs</li> <li>- Proportion of low birth weight newborns referred</li> <li>- Proportion of women lost during follow up</li> <li>- Proportion of newborns lost during follow up</li> </ul>                                              |

Figure 2, Theory of Change

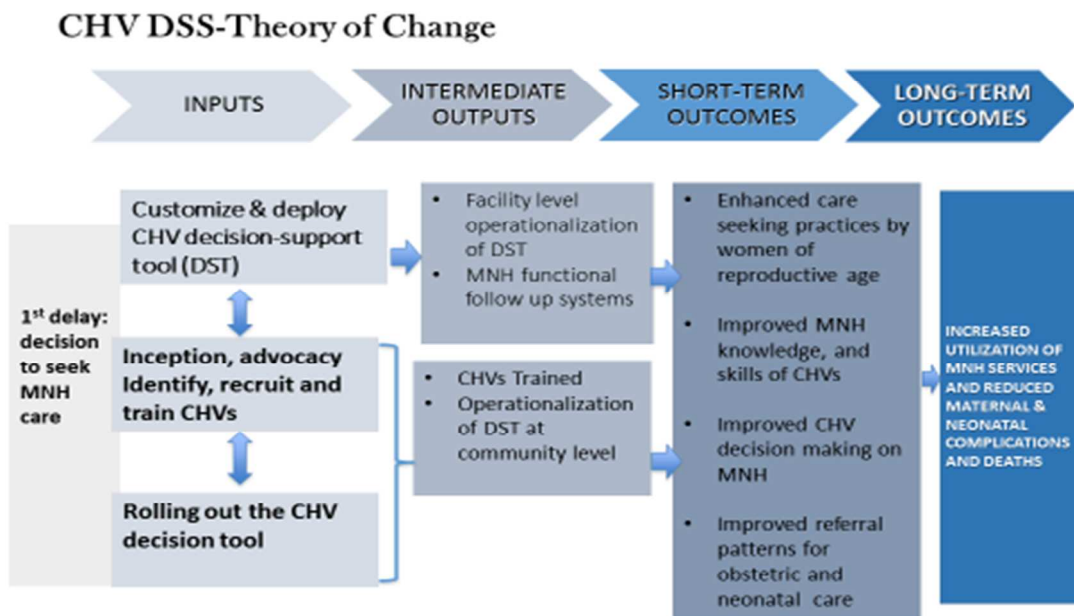

view only

1  
2  
3  
4  
5  
6  
7  
8  
9  
10  
11  
12  
13  
14  
15  
16  
17  
18  
19  
20  
21  
22  
23  
24  
25  
26  
27  
28  
29  
30  
31  
32  
33  
34  
35  
36  
37  
38  
39  
40  
41  
42  
43  
44  
45  
46  
47  
48  
49  
50  
51  
52  
53  
54  
55  
56  
57  
58  
59  
60

Figure 3, Mobile Data Gathering Platform

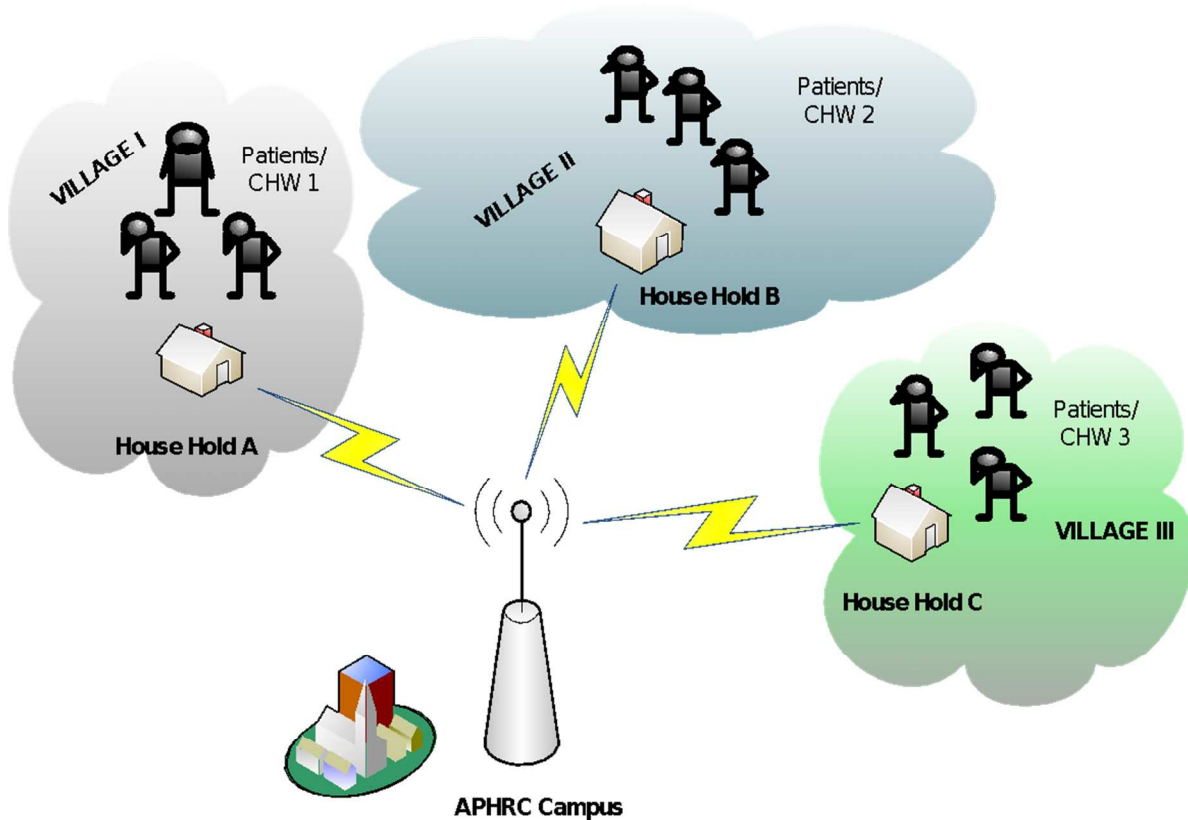

Figure 4: How the system works

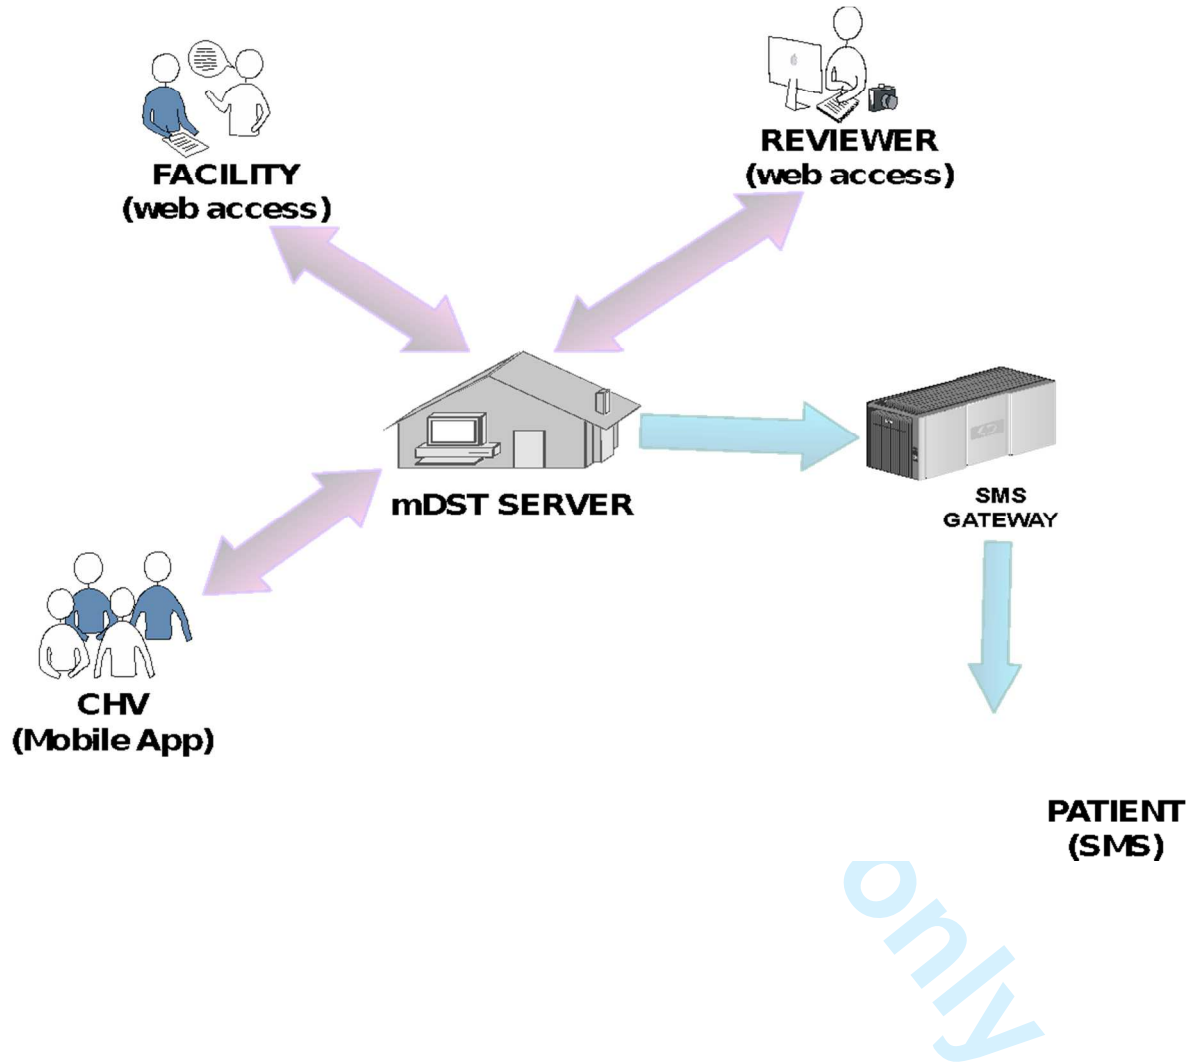

1  
2  
3  
4  
5  
6  
7  
8  
9  
10  
11  
12  
13  
14  
15  
16  
17  
18  
19  
20  
21  
22  
23  
24  
25  
26  
27  
28  
29  
30  
31  
32  
33  
34  
35  
36  
37  
38  
39  
40  
41  
42  
43  
44  
45  
46  
47  
48  
49  
50  
51  
52  
53  
54  
55  
56  
57  
58  
59  
60

Figure 5, Project timeline

| CHV Decision Support Application: Pilot study |    |    |      |      |    |    |    |
|-----------------------------------------------|----|----|------|------|----|----|----|
|                                               |    |    | 2016 | 2017 |    |    |    |
| Activities                                    | Q1 | Q2 | Q3   | Q4   | Q5 | Q6 | Q7 |
| Inception period                              | ■  |    |      |      |    |    |    |
| Seek ethical approval                         |    | ■  |      |      |    |    |    |
| Baseline                                      |    |    | ■    |      |    |    |    |
| Recruit & train field team                    |    |    | ■    |      |    |    | ■  |
| Conduct Baseline                              |    |    | ■    |      |    |    |    |
| Conduct Endline                               |    |    | ■    |      |    |    | ■  |
| Data cleaning                                 |    |    | ■    |      |    |    |    |
| Data analysis and interpretation              |    |    | ■    |      |    |    |    |
| Scientific write up on baseline               |    |    | ■    |      |    |    |    |
| Scientific write up on endline                |    |    | ■    |      |    |    |    |
| Develop Decision Support System               |    | ■  |      |      |    |    |    |
| Training of CHWs                              |    |    | ■    |      |    |    |    |
| Training of DHMTs                             |    |    | ■    |      |    |    |    |

# BMJ Open

**The role of a decision-support smartphone application in enhancing Community Health Volunteers' effectiveness to improve maternal and newborn outcomes in Nairobi, Kenya: a quasi-experimental research protocol**

|                                 |                                                                                                                                                                                                                                                                                                                                                                                                                                                                                                               |
|---------------------------------|---------------------------------------------------------------------------------------------------------------------------------------------------------------------------------------------------------------------------------------------------------------------------------------------------------------------------------------------------------------------------------------------------------------------------------------------------------------------------------------------------------------|
| Journal:                        | <i>BMJ Open</i>                                                                                                                                                                                                                                                                                                                                                                                                                                                                                               |
| Manuscript ID                   | bmjopen-2016-014896.R1                                                                                                                                                                                                                                                                                                                                                                                                                                                                                        |
| Article Type:                   | Protocol                                                                                                                                                                                                                                                                                                                                                                                                                                                                                                      |
| Date Submitted by the Author:   | 03-Feb-2017                                                                                                                                                                                                                                                                                                                                                                                                                                                                                                   |
| Complete List of Authors:       | Bakibinga, Pauline; African Population and Health Research Center, Health Challenges and Systems Program<br>Kamande, Eva; African Population and Health Research Center, Health Challenges and Systems<br>Omuya, Milka; African Population and Health Research Center, Health Challenges and Systems<br>Ziraba, Abdhalah; African Population and Health Research Center, Health Challenges and Systems<br>Kyobutungi, Catherine; African Population and Health Research Center, Health Challenges and Systems |
| <b>Primary Subject Heading</b>: | Health services research                                                                                                                                                                                                                                                                                                                                                                                                                                                                                      |
| Secondary Subject Heading:      | Public health, Health informatics                                                                                                                                                                                                                                                                                                                                                                                                                                                                             |
| Keywords:                       | Decision-Support, Maternal and Newborn Health, Community Health Volunteers, Slums, Kenya                                                                                                                                                                                                                                                                                                                                                                                                                      |
|                                 |                                                                                                                                                                                                                                                                                                                                                                                                                                                                                                               |

SCHOLARONE™  
Manuscripts

1  
2  
3 **The role of a decision-support smartphone application in enhancing Community Health**  
4  
5 **Volunteers' effectiveness to improve maternal and newborn outcomes in Nairobi, Kenya: a quasi-**  
6 **experimental research protocol**  
7  
8

9  
10 **Pauline Bakibinga<sup>1\*</sup>, Eva Kamande<sup>2</sup>, Milka Omuya<sup>3</sup>, Abdhalah K Ziraba<sup>4</sup>, & Catherine**  
11 **Kyobutungi<sup>5</sup>**  
12

13  
14  
15  
16 Institutional Affiliation-Health Challenges and Systems Research Program, African Population & Health  
17 Research Center, Manga Close, Off Kirawa Road, P.O. Box 10787-00100, Nairobi, Kenya  
18  
19

20  
21  
22  
23  
24 P. Bakibinga email: [paulabak80@gmail.com](mailto:paulabak80@gmail.com)  
25

26  
27 \*Corresponding author  
28  
29  
30  
31  
32  
33  
34  
35  
36  
37  
38  
39  
40  
41  
42  
43  
44  
45  
46  
47  
48  
49  
50  
51  
52  
53  
54  
55  
56  
57  
58  
59  
60



**Abstract:****Introduction;**

Improving maternal and newborn survival remain major aspirations for many countries in the global south. Slum settlements, a result of rapid urbanization in many developing countries including Kenya, exhibit high levels of maternal and neonatal mortality. There are limited referral mechanisms for sick neonates and their mothers from the community to health care facilities with ability to provide adequate care. In this study we specifically plan to develop and assess the added value of having community health volunteers (CHVs) use smartphones to identify and track mothers and children in a bid to reduce pregnancy-related complications and newborn deaths in the urban slums of Kamukunji sub-County in Nairobi, Kenya.

**Methods and analysis;**

A quasi-experimental study. We are implementing an innovative, m-health application known as mobile-Partnership for Maternal, Newborn and Child Health (mPAMANECH) which uses dynamic mobile phone and web-portal solutions, to enable CHVs make timely decisions on the best course of action in their management of mothers and newborns at community level. The application is based on existing guidelines and protocols in use by CHVs. Currently, CHVs, conduct weekly home visits and make decisions from memory or using unwieldy manual tools, and thus prone to making errors. mPAMANECH has an in-built algorithm that makes it easier, faster and more likely for CHVs to make the right management decision. We are working with a network of selected CHVs and maternity centres to pilot test the tool. To measure the impact of the intervention, baseline, midline and endline surveys will be conducted. Data will be obtained through qualitative and quantitative methods.

**Ethics and dissemination.**

Ethical approval for the study was obtained from the African Medical Research Foundation. Key messages from the results will be packaged and disseminated through meetings, conference presentations, reports, factsheets and academic publications to facilitate uptake by policy makers.

*Keywords: Decision-Support; Community Health Volunteers, Maternal and Newborn Health; Slums; Kenya*

## Strengths and Limitations

- The project seeks to address a critical challenge in the health care system in a slum context:

identification and referral of ill mothers and newborns.

- It utilises the existing CHV work tools and mobile phone technology to show how an evidence based intervention can improve health outcomes at community level.

-A potential harmful unintended consequence stems from the fact that CHVs are not medically trained and as such could make a decision to treat at home, rather than refer (even when the system advises otherwise) with possible negative health consequences for the mothers and their newborns.

-However, since the system allows health workers to access this data, they will be in-charge of following up on such cases to avoid unnecessary delays and such unintended consequences.

## 1. Introduction:

Annually, close to 300,000 women die from maternal causes, 3.3 million children are stillborn while an additional 3.3 million die within the first month of life [1-3]. A vast majority of these deaths occur in sub-Saharan African and South Asia. Most maternal and newborn deaths are due to causes directly related to pregnancy and childbirth [1, 2, 4]. Most of these causes are preventable with existing cost-effective interventions. Kenya has made some progress in improving maternal and newborn survival over the years. Maternal mortality has progressively reduced from 488/100,000 to 362/100,000 between 2008/09 and 2014. Neonatal mortality has reduced from 31 to 22 deaths per 1000 live births, between 2008/9 and 2014, [5, 6]. Neonatal deaths account for about 60% of all infant deaths in Kenya [6]. Despite the existence and knowledge about simple strategies and techniques to reduce maternal and newborn deaths, these interventions are not up to scale due to inadequacy of health care facilities, trained personnel, information, poor referral systems and pervasive poverty.

### Community Health Volunteers

The need to ensure universal health coverage amidst a global health care workers crisis saw the identification of community health volunteers (CHVs) as a critical alternative and workforce at the community level [7]. CHVs are volunteers identified from communities that they reside in and offered a few days' basic training based on a set curriculum before they are assigned community health promotion roles. CHVs belong to established community units with a responsibility of making weekly home visits to households within designated geographical areas. CHVs were identified under Kenya's Community Health Strategy as a means of alleviating the healthcare worker crisis. To date, CHVs continue to bridge the critical gap between communities and the formal health system, and many positive lessons have been learned in Kenya and other

1  
2  
3 parts of the world [8-10]. CHVs in Kenya, like in many emerging economies, are responsible for  
4  
5 the majority of grassroots health care delivery, and as such, continue to play a very critical role  
6  
7 in primary health care delivery.  
8  
9

### 10 **Decision-support systems**

11  
12 Clinical decision support (CDS) refer to tools used to improve decision-making in the patient  
13  
14 care workflow [11]. CDS provides clinicians, staff, patients or other individuals with knowledge  
15  
16 and person-specific information, intelligently filtered or presented at appropriate times, to  
17  
18 enhance health and health care [12, 13]. These tools include computerized alerts and reminders  
19  
20 to care providers and patients; clinical guidelines; condition-specific order sets; focused patient  
21  
22 data reports and summaries; documentation templates; diagnostic support, and contextually  
23  
24 relevant reference information, among other tools [14]. They are beneficial in reducing errors,  
25  
26 increasing quality of care and improving efficiency.  
27  
28  
29  
30

### 31 **Mobile technology for health**

32  
33 Mobile technologies have the potential to bridge systemic gaps needed to improve access to and  
34  
35 use of health services, particularly among underserved populations [15]. Worldwide, the use of  
36  
37 mobile and/or electronic devices to support both medical and public health practice and research  
38  
39 (mHealth) is increasingly being appreciated [16-19]. The high and ever growing mobile  
40  
41 penetration coupled with investments from technology companies that provide accessible  
42  
43 platforms onto which innovations can establish and offer value-based products [17]. Innovations  
44  
45 include mobile phone platforms/applications and micro-insurance packages. Given the nature  
46  
47 and tight timeframes of most obstetric and neonatal emergencies, which more often than not  
48  
49 demand quick access to quality care at short notice, mobile phone innovations are a cheap and  
50  
51 fast solution especially in areas with poor healthcare infrastructure which have shown  
52  
53  
54  
55  
56  
57  
58  
59  
60

1  
2  
3 improvements in maternal and child health outcomes [19, 20]. The majority of innovations on  
4 the market are tailored towards promoting reproductive, maternal, and child health [16, 21]. In  
5 addition, various projects have been designed and evaluated on CHVs use of mobile technology  
6 to deliver interventions [22, 23]. Decision-support systems have been highlighted as a critical  
7 factor in reducing errors in evidence-based clinical practice. For clinicians, studies have  
8 demonstrated that computerized decision support systems can be used to improve compliance to  
9 practice guidelines [12, 13]. Given the limited training obtained and skills that the CHVs  
10 possess, coupled with the distances they work from the clinical settings mobile information  
11 technologies tools enable them to provide much needed health services.  
12  
13  
14  
15  
16  
17  
18  
19  
20  
21  
22  
23  
24  
25  
26

27 Over the last decade, more mobile and electronic information tools have been developed, tested  
28 and implemented with CHVs to support their work roles. The tools help the CHVs in  
29 surmounting challenges such as lack of appropriate work tools and inadequate supportive  
30 supervision and training [22, 23]. These tools have been instrumental in improving access to care  
31 by marginalized population groups subjected to stigma and those in hard to reach areas by  
32 reducing both time and cost of travel. As such, research on CHVs' use of mHealth tools in  
33 important. Several pilot projects, utilizing multiple designs and measures have been  
34 implemented. The projects have reported improvements in services rendered by CHVs and the  
35 related health outcomes for communities. In sub-Saharan Africa, most of the interventions have  
36 demonstrated improvements in the CHVs' delivery of maternal, newborn and child health,  
37 Tuberculosis and sexual and reproductive health services, among others [20, 22]. The  
38 innovations largely use SMS and hotlines enabling mothers to access vital information and  
39 timely referrals as a result of better and faster communication and transport. Available evidence  
40  
41  
42  
43  
44  
45  
46  
47  
48  
49  
50  
51  
52  
53  
54  
55  
56  
57  
58  
59  
60

1  
2  
3 shows the usefulness of mHealth tools in facilitation of compliance with practice guidelines and  
4 process improvement [22]. However, many of the interventions have been limited  
5 methodologically by their inability to demonstrate effectiveness and or impact related to patient  
6 outcomes. In addition a lack of use of nationally accepted guidelines and open source tools limits  
7 the scalability of these interventions. In addition, available literature does not provide cost  
8 estimates necessary for delivery of program targets. Furthermore, a top to bottom approach that  
9 does not incorporate the ideas of the CHVs in the development of the tools is a major  
10 impediment as successful projects use the CHVs as experts in the design and management of  
11 their interventions [22].  
12  
13  
14  
15  
16  
17  
18  
19  
20  
21  
22  
23  
24  
25  
26  
27  
28

29 The African Population and Health Research Center (APHRC) has implemented a health systems  
30 strengthening project, Partnership for Maternal, Newborn and Child Health (PAMANECH) in  
31 Korogocho and Viwandani informal settlements of Nairobi, Kenya [24]. The project sought to  
32 strengthen the healthcare delivery system in the urban informal settlements to be more  
33 responsive to the health needs of mothers and their children through enhanced service delivery  
34 public-private partnerships. In a bid to improve the health management information system, an  
35 innovative mHealth application, was developed. The mPAMANECH application was developed  
36 as an integrated data capture tool running as a mobile app with selected reporting forms for  
37 CHVs in Kenya. It operates in an interconnected network of CHVs and health facilities within a  
38 defined local system. It is designed to replace the numerous paper-based forms that do not allow  
39 integration of patient data from the community to the health facility and back for better referral  
40 and management of patients. This system has been seen to improve the reporting abilities of  
41  
42  
43  
44  
45  
46  
47  
48  
49  
50  
51  
52  
53  
54  
55  
56  
57  
58  
59  
60

1  
2  
3 CHVs as it is less cumbersome than the paper-based system and enhanced data quality as it has a  
4 function that limits saving data until all necessary fields are filled in [25]. In addition, the CHEW  
5 can access a CHV's data remotely without having to wait for the end of the month for the CHV  
6 summaries. The desire to improve the functionality of the existing system to include a decision  
7 support function provides the basis on the new project.  
8  
9

10 This project attempts to bridge this gap by incorporating CHV views, utilizing the tools approved  
11 by the Ministry of Health and allowing for assessment of health outcomes in the design and  
12 implementation of the project. The decision support system is developed from open source tools.  
13 In addition, a cost effectiveness analysis would be conducted to inform county and national  
14 implementation plans regarding the necessary investments for set up and maintenance.  
15  
16  
17  
18  
19  
20  
21  
22  
23  
24  
25  
26  
27  
28

## 29 **2. Methods and Analysis**

### 30 **Research Objectives**

31  
32 The overall objective of the proposed work is to develop and validate a decision-support  
33 algorithm within a mHealth application in improving maternal and newborn health outcomes in  
34 urban slums in Kamukunji sub-County in Nairobi, Kenya. The project seeks to assess the added  
35 value of using a CHV decision-support module of mPAMANECH in reducing prenatal and  
36 postnatal maternal complications and newborn deaths.  
37  
38

39 Specifically the project will assess (i) the feasibility and acceptability of using a decision-support  
40 module of mPAMANECH and (ii) whether decision-support platform contributes to increase in  
41 utilization of MNH services. We will measure several outcomes, *figure 1* related to the two  
42 specific objectives, above. The outcome measures have been used in different studies assessing  
43 CHV abilities to assess and make referrals [26, 27].  
44  
45  
46  
47  
48  
49  
50  
51  
52  
53  
54  
55  
56

## Conceptual framework, Theory of Change and Operationalization

Our innovation centres around enhancing the functionality and utility of the current mPAMANECH application to include a community decision support tool to be used within a local system comprised of CHVs and five maternity centres serving five slum settlements in Nairobi. The decision-support module in the mPAMANECH application will supplement the existing MNCH data capture modules and help in the identification of high risk facing pregnant women, new mothers and newborns with complications, and to make timely and correct decisions on referral for cases that need intervention. The main beneficiaries are pregnant women (over 24 weeks), mothers in the immediate post-partum period and their newborns (up to 28 days old).

The use of CHVs in delivering the mobile phone based intervention and follow up by the SCHMT will ensure sustained support and adherence to the intervention during pregnancy, immediate postpartum and in the neonatal period. The mPAMANECH has the official 100, 513, 514 and 515 forms in use by CHVs and Community Health Extension Workers (CHEWs), who supervise the CHVs [28, 29]. A dedicated team of CHEWs will ensure that the intervention is delivered as expected and non-adherence captured and documented. CHV adherence will be measured by the CHEWs who will provide additional support, correcting CHVs but not forms. They will be used to sample some of the CHVs' work. For each woman or newborn with referral symptom, seen at household level, we will compare the CHEW's assessment to that of the CHV in regard to the proportion of cases for whom CHWs identified and indicated correctly on their forms as requiring a referral, and the proportion for whom a written referral was provided. This is beneficial because the review meetings are at the end of the month. The sampling of the work



1  
2  
3 will enable on-going supportive supervision in order to improve the quality of the CHVs work.

4  
5 In addition, more assessment will be made for those referrals that will be seen at health facility  
6  
7 level, comparing danger signs identified by the CHV to those seen by the clinician.  
8  
9

10 The attributes of the solution include: 1) Use of any android devices - the entire application is  
11 operable on phones, tablets or desktops/laptops; 2) Within a linked local system – messaging is  
12 delivered internally via the portal and no extra network charges are required for messaging; 3)  
13  
14

15 The application is bandwidth light and takes about 100 Kenya shillings a month per user, based  
16 on local data bundle charges. The application can work offline and auto-synchronize as soon as  
17  
18

19 network connectivity is re-established; 4) Updates are automated and there is no need for an IT  
20 expert to have physical access to the device to execute a software patch or change; 5) The  
21  
22

23 application has security features that protect users' confidentiality and limit access to a closed  
24 but linked local system of health facilities and CHVs with varied access rights; 6) It has the  
25  
26

27 ability to limit use of other phone functionality to only allow this application to run. This helps  
28 prevent abuse of the device and promote saving on bandwidth. We aim to enhance the  
29  
30

31 functionality and utility of the current mPAMANECH application to include a community  
32 decision support tool to be used within a local system comprised of selected CHVs and five  
33  
34

35 maternity centres serving slum settlements in Nairobi. In the 'Operationalisation' section, we  
36 describe more on how the decision support system is expected to work.  
37  
38  
39  
40  
41  
42  
43  
44  
45  
46  
47  
48  
49  
50  
51  
52  
53  
54  
55  
56  
57  
58  
59  
60

1  
2  
3 From our proposed theory of change, *figure 2*, we anticipate that the decision support module of  
4 mPAMANECH will assist the CHVs in the identification of high risk pregnant women, new  
5 mothers and newborns with complications, and to make timely and correct decisions on referral  
6 for cases that need intervention. With the improved knowledge and skills possessed by the CHVs  
7 more women and neonates in need of health care will be identified and referred to the necessary  
8 health facilities. As a result, there will be increase utilisation of maternal and neonatal health  
9 services and reduced maternal and neonatal complications and deaths.  
10  
11  
12  
13  
14  
15  
16  
17  
18  
19  
20  
21  
22

### 23 **Operationalisation of the Decision Support System**

24  
25  
26 The mobile decision support system (mDSS) mobile application (app) is an Android app that  
27 installs from the phone and runs as an application, *figure 3*. The app will be hosted at Google  
28 store and is accessible for download via the internet automatically to the user handset.  
29  
30  
31

32  
33  
34 Once installed, the handset and the application will be configured with the credentials of the  
35 CHV including username and password, which are linked with the operating phone number. This  
36 setup allows the system to register and associate collected records to the respective CHV; useful  
37 for reporting and analysis purposes.  
38  
39  
40  
41  
42

43  
44 The CHVs will be provided with a mobile phone running the mHealth app for data collection  
45 which is then relayed to the head office at APHRC Campus. When visiting households for data  
46 collection, by initiating a new record the system automatically picks the geolocation of the  
47 household and associates it with the record.  
48  
49  
50  
51  
52  
53  
54  
55  
56  
57  
58  
59  
60

1  
2  
3 The CHV will complete the respective form and save the information at any stage on the  
4 handset. This method allows the CHV to continue collecting more information and only submit  
5 the completed form to the server over the internet. Where the handset detects that internet  
6 connectivity is not available for one reason or the other, the completed forms will be stored in the  
7 phone and only be relayed to the server when the connectivity is established. Because the  
8 application is in communication with the server in real-time, any update of the data is  
9 immediately available to the CHVs. The application is preconfigured with danger signs for both  
10 mothers and newborns as defined by the WHO [30]. When any of the danger signs is picked by  
11 the system, the CHV is immediately prompted to refer the patient to a facility within the  
12 network.

13  
14  
15 The system is to be set up in such a way that the CHV will not be allowed to proceed and  
16 complete the forms until the referral is done. The patient's information will be available to all the  
17 facilities within the network and he/she will be able to visit any of the networked facilities for  
18 treatment. This information is also relayed to the rest of the other facilities and a record of the  
19 visit is kept in the server. Within 24 hours if the patient has not been seen in any of the  
20 networked facilities, an SMS message is relayed to the respective CHV handset. At this point,  
21 the CHV should follow up with the patient to inquire about their condition and whether they  
22 chose to honour the referral to a facility outside the network or not.

23  
24  
25 When the patient visits a facility within the network, using the household number and the name  
26 he/she will be easily identified and treated. The clinician is able to record the treatment in the  
27 patient's information, which is recorded in the server.

1  
2  
3 Both the CHV and the clinician's information are available to a reviewer in real time from the  
4 web. The reviewer's role would be to assess the CHV's reason for referral and the clinician's  
5 final diagnosis for correctness. The feedback from the reviewer will be available and shared on a  
6 monthly basis during review meetings. Every week, the CHEW, will randomly sample referrals  
7 made by each CHV to assess their correctness. This will be compared with the 'reviewers'  
8 summary.  
9

## 10 **mDSS Solution- Key Features (figure 4)**

### 11 **CHV (mobile App)**

12 Through this app, the mDSS data collection tools are accessible on the CHV mobile handset. It  
13 allows for completion and submission of the information to the mDSS Server.  
14

### 15 **mDSS Server**

16 A database driven web application that acts as a host for the collected information. It also has a  
17 web interface for data manipulation by the facility healthcare worker(s) and reviewer.  
18

19 The mDSS server application incorporates an application logic component that connects with the  
20 SMS and email gateways. This allows for real-time communication of certain critical indicators  
21 to the respective recipients. For example, where a patient has not shown up at the referred  
22 facility, the CHV will be alerted.  
23

### 24 **Facility (web access)**

25 This module is accessible at the facility via the web. The application allows the clinician to treat  
26 the patient and record the treatment. The facility portal is accessible by facility staff to manage  
27

1  
2  
3 referrals. The “Messages” to alert the CHVs are to be integrated with WhatsApp for effective  
4  
5 message delivery over the same mobile phone.  
6  
7

### 8 9 **Reviewer (web access)**

10  
11 This module is also accessible via the web, and provides the reviewer a view to assess both the  
12  
13 CHV referral report and the clinician’s diagnosis. It is based on this analysis that a decision is  
14  
15 measured.  
16  
17

### 18 19 **Null hypothesis:**

20  
21 Usage of a CHV decision-support module does not have an effect on utilization of MNH  
22  
23 services.  
24  
25

### 26 27 **Study Design and Sampling Strategy**

#### 28 29 **a. Study Design**

30  
31 To answer the question on effect of the decision support system, we will use a quasi-  
32  
33 experimental design with pre and post assessments to determine the impact, if any, on the MNH  
34  
35 services and selected health indicators.  
36  
37

38  
39 We will work with three community units (CUs) from which a group of 50 CHVs will serve as  
40  
41 the intervention group. Three CUs in Embakasi sub-County, with 50 CHVs will serve as the  
42  
43 control. The CUs in the control group will be geographically distant from the intervention site to  
44  
45 limit contamination. The control group will be facilitated within the normal standard of practice  
46  
47 which includes paper-based reporting. The idea is to compare access to MNH services, referral  
48  
49 practices and MNH outcomes between those with a decision-support tool with those working  
50  
51 with traditional paper-based tools.  
52  
53  
54  
55  
56  
57  
58  
59  
60

1  
2  
3 We will conduct a baseline survey and an end-line at least one year after the full implementation  
4 of the intervention. The control group will be assessed at the same time as the surveys are being  
5 conducted in the intervention group. To strengthen the case for causal inference we will also do  
6 a systematic monitoring and documentation of the intervention based on our theory of change.  
7  
8 The monitoring and documentation will also capture any other contextual factors that may  
9 influence the same outcomes as our intervention.  
10

11  
12 To answer the question on feasibility, we will conduct a mixed methods assessment of the CHVs  
13 and CHEWs. Qualitative assessments of their current work experiences with the paper based  
14 system as well as after the introduction of the mobile based system will be conducted. We will  
15 assess ease of use, challenges experienced and opportunities for improvement. These will be  
16 triangulated with their HMIS reports (paper and electronic).  
17

#### 18 19 20 21 22 23 24 25 26 27 28 29 30 31 32 33 34 35 36 37 38 39 40 41 42 43 44 45 46 47 48 49 50 51 52 53 54 55 56 57 58 59 60

b. **Study Setting**

The intervention site covers informal settlements in Kamukunji sub County, which, like other  
slums, are characterized by poverty, poor coverage of social services and poor health outcomes.  
We will identify CUs and 5 facilities that serve the CUs. Embakasi sub-County will serve as the  
control site. We will identify three CUs to serve as controls.

#### c. **Sampling**

The CUs in the intervention and control groups will be purposively selected based on discussions  
with the sub-County community strategy coordinators for Kamukunji and Embakasi. We will  
select CUs with the worst health indicators for both the intervention and control groups,  
including those serving informal settlements, and with more likelihood to benefit from the  
intervention.

For the population based surveys:

1  
2  
3 ➤ **Quantitative study**

4  
5 ▪ *Study population*

6  
7  
8 The project will target households with women of reproductive age (15-49 years) in the informal  
9 settlements of Kamukunji and Embakasi. It will also target health care providers in five selected  
10 health facilities as well as the sub-County Health Management teams of Kamukunji, Embakasi,  
11 Makadara and Nairobi City County.  
12

13  
14  
15 A quantitative survey will be conducted focussing mainly on maternal and newborn health and  
16 family planning services.  
17

18  
19  
20 ▪ *Sample size estimation*

21  
22 The key outcome of interest is correct referral practices. Using proportion of neonates with at  
23 least one danger sign referred by CHVs as the indicator, since it is representative of the target  
24 population, the total sample size for each group has been estimated as 173 (346 in total). Using a  
25 difference in proportion 13.3 % for neonates with danger signs referred (rising from 16.7 to  
26 30%), at 95% CI for 80% power and sample proportions of 50% in the intervention and 40% in  
27 the control groups, respectively, we came up with a sample size of 315. Accounting for a  
28 potential non-response rate of 10% based on previous studies in similar study populations, the  
29 effective sample size is 346. Using correct decisions made by CHVs (one of the indicators to be  
30 measured), the sample size was estimated as 199. 346 is therefore an appropriate sample size.  
31  
32  
33  
34  
35  
36  
37  
38  
39  
40  
41  
42  
43  
44

45  
46 ▪ *Sampling procedure*

47  
48 To measure feasibility and acceptability, all the CHVs in the intervention site will be assessed, in  
49 addition to an audit of the functionality of the system. We will measure the percentage time for  
50 which the system is down on a monthly basis (**Numerator:** Number of times (in minutes) when  
51 the system is down. **Denominator:** Total active time in a month. Down time defined as 30  
52  
53  
54  
55  
56  
57

1  
2  
3 minutes of hanging and Active time as time without hitches), proportion of CHVs effectively  
4 using the decision support system (Within the system, on a quarterly basis we will be able to  
5 generate reports on decisions, correct or otherwise, made by the CHVs. These will also be  
6 compared to the control site that will only have a paper based system of data collection), and the  
7 experiences of the CHVs and the mothers with the mobile based system. These will be compared  
8 to the investment.  
9  
10  
11  
12  
13  
14  
15  
16  
17  
18  
19

20 To answer the question on effect of the system on utilisation of services, the data above will be  
21 triangulated with data from the **mPAMANECH application which already has an integrated**  
22 **data collection module**, the data generated by the CHVs and participating health facilities will  
23 be retrieved, cleaned and analyzed to derive estimates of the main outcome of interest – correct  
24 referral practices. In addition, these data will be triangulated with other sources such as the CHV  
25 monthly reports and health facility HMIS. A system of random numbers generated using STATA  
26 will be used to select the respondents based on a sampling frame that is going to be informed by  
27 an updated household register in the selected community units.  
28  
29  
30  
31  
32  
33  
34  
35  
36  
37

#### 38 ➤ **Qualitative study**

39 We will use focus group discussions (FGDs) and in-depth interviews among the direct project  
40 beneficiaries and CHVs, and key informant interviews with key actors (sCHMTs, health  
41 providers, CHVs and community leaders). Participants will be purposively selected to represent  
42 the different stakeholders as well as different health service user categories (users and non-  
43 users).  
44  
45  
46  
47  
48  
49  
50  
51

52 Data from the quantitative survey will be used to identify women who have or not used specific  
53 MNH services and these will be approached to participate in the focus group discussions or in-  
54  
55  
56  
57  
58  
59  
60



1  
2  
3 depth interviews. Other respondents will be identified based on their position in the community  
4  
5 and their role in the project.  
6  
7  
8  
9

## 10 **Data Collection, Management and Analysis**

11  
12 Data collection:

13  
14 We will conduct a baseline survey and an end-line at least one year after the full implementation  
15  
16 of the intervention. The control group will be assessed at the same time as the surveys are being  
17  
18 conducted in the intervention group. To strengthen the case for causal inference we will also do  
19  
20 a systematic monitoring and documentation of the intervention based on our theory of change.  
21  
22 The monitoring and documentation will also capture any other contextual factors that may  
23  
24 influence the same outcomes as our intervention. The effects and impact of the project will be  
25  
26 determined by triangulating data and information from different sources, examining trends where  
27  
28 possible, and trying to find and support explanations for the observed findings.  
29  
30  
31  
32  
33

34 Our key data sources will be the following: household surveys, routine HMIS data and  
35  
36 qualitative assessments (interviews and focus group discussions).  
37  
38

39 We will conduct simple and multiple logistic regression analyses comparing differences in the  
40  
41 proportions of women in reproductive age and children under-five at baseline and end line for  
42  
43 variables like antenatal coverage, vaccination coverage, skilled birth attendance, among others,  
44  
45 (See figure 1 for key indicators). These analyses will control for any differences in the samples  
46  
47 (if any) at the two time points as well as the contribution of contextual factors that may have  
48  
49 occurred in the course of the implementation.  
50  
51  
52  
53  
54  
55  
56  
57  
58  
59  
60

1  
2  
3 mPAMANECH data: Descriptive data in terms of referrals by, diagnostic decisions, among  
4  
5 others, will be summarised using means and standard deviations for the parametric continuous  
6  
7 data and medians with inter-quartile ranges for the non-parametric data. Categorical data such as  
8  
9 referrals by age and gender will be summarised using proportions and percentages.  
10  
11

12  
13 Qualitative data: Qualitative data will be transcribed and saved in Word format. Transcribed  
14  
15 word files will be imported into NVIVO software (QSR International Pty Ltd) for coding and  
16  
17 further analysis. Analysis across all transcripts will be conducted using a constant comparative  
18  
19 method to identify themes and their repetitions and variations. The analysis will also aim to  
20  
21 identify changes (if any) in various indicators that could be attributed to the intervention.  
22  
23

### 24 25 **3. Ethics and Dissemination**

26  
27 The study was reviewed internally by APHRC's internal scientific review committee. Ethical  
28  
29 approval for the project was obtained from the African Medical Research Fund's Ethical and  
30  
31 Scientific Review Committee (AMREF-ESRC P279/2016). The research team has undergone the  
32  
33 NIH training on protecting human research participants. We shall seek informed consent from all  
34  
35 study participants. All survey data will be collected in privacy and will be treated with  
36  
37 confidentiality. It will be made clear to participants from the onset that participation in the study  
38  
39 is voluntary and that they may choose to withdraw from the study at any time and for whatever  
40  
41 reasons without fear of penalty. The mPAMANECH datasets will be available to users (CHVs,  
42  
43 clinicians, CHEWs, among others) based on assigned, but limited, rights to protect the identity of  
44  
45 study participants. Only the core research team will have access to all of this information. The  
46  
47 entire dataset will be stored in the APHRC server.  
48  
49  
50  
51  
52  
53  
54  
55  
56  
57  
58  
59  
60

1  
2  
3 The potential risks for study participants are limited to (i) data breaches ii) time spent on the  
4 interview and (iii) discomfort experienced due to particular questions that respondents may  
5 perceive as upsetting or personal. These potential risks will be carefully explained to each  
6 participant during the process of obtaining informed consent.  
7  
8  
9  
10

11  
12 For the data collected on the phones and computers, once it is saved the data is relayed in real  
13 time to the APHRC server and no information is saved on the phone or the computer. The users  
14 will only be able to see summary data, without the participants' details. To further minimise the  
15 risk attached to data breaches following the loss of a smartphone, each phone will have a 4-digit  
16 pass code to enable the CHVs log into the phone. This code will become active after 3 minutes  
17 on non-use. The third level of security is the username and password on each device.  
18  
19  
20  
21  
22  
23  
24  
25  
26  
27  
28

#### 29 Plan for Communicating Findings of the Study:

30 Results obtained through this study will be made available to those who contributed information;  
31  
32 the communities of Kamukunji and Embakasi. In addition,  
33  
34

- 35 i. The study team will conduct one major dissemination workshop in Kenya to share  
36 research findings with development partners, local NGOs, healthcare providers, activists,  
37 media houses, health professional societies, and policymakers.  
38
- 39 ii. Findings of the study will be shared at local and international conferences with  
40 researchers and policy makers.  
41  
42
- 43 iii. We also expect to publish 3 peer-reviewed articles in Open Access scientific journals.  
44  
45
- 46 iv. The Policy Engagement and Communications (PEC) unit at APHRC will also use the  
47 findings of this study to produce policy briefs, fact sheets, and working papers, as well as  
48 newsletters, which will be shared with a wide range of stakeholders.  
49  
50  
51  
52  
53  
54  
55  
56

- 1  
2  
3 v. The findings of the study will also be shared through APHRC's website.  
4  
5  
6  
7  
8  
9  
10  
11  
12  
13

#### 14 **4. Discussion**

15  
16  
17  
18  
19 Maternal and neonatal health are both national and global priorities given that maternal and  
20  
21 neonatal health indicators have not appreciably improved over the Millennium Development  
22  
23 Goals life-span. They remain aspirations in the Sustainable Development agenda. CHVs are a  
24  
25 critical component of the health workforce bridging the gap between communities and the formal  
26  
27 health system. They not only improve coverage and access to basic health services but are also  
28  
29 usually available in locations where and at times when formal health services are unavailable or  
30  
31 inadequate. Quality healthcare is largely supported by quality data. Kenya still faces challenges  
32  
33 with its Health Management Information System. Inaccurate data as a result of poor  
34  
35 documentation impair the country's planning processes. This project accords APHRC and its  
36  
37 partners an opportunity to utilize funds that have been identified to respond to Kenya's needs; to  
38  
39 improve maternal and newborn health.  
40  
41  
42  
43

44  
45 The next steps of the project if the experiments under this grant are successful will include  
46  
47 sharing the findings with the Nairobi City County and the funder and agreeing on the next phase  
48  
49 of implementation. The Ministry of Health, Nairobi, is keen to roll out the system county-wide  
50  
51 subject to availability of funding. The project team will work with the consortium to generate  
52  
53 evidence to support decision-making at whatever stage of implementation. These may include  
54  
55  
56  
57  
58  
59  
60

1  
2  
3 effectiveness in reducing adverse maternal and neonatal outcomes at national level, cost-  
4 effectiveness, process issues such as CHV motivation and efficiency among others.  
5  
6

7  
8 Potential impediments to the intervention include possible technology failure, loss of equipment  
9 (phones) and CHV turnover; all of which could require revisions and adaptations in the work  
10 plan (e.g., quality assurance, insurance, and training). A potential harmful unintended  
11 consequence stems from the fact that CHVs are not medically trained and as such could make a  
12 decision to treat at home, rather than refer (even when the system advises otherwise) with  
13 possible negative health consequences for the mothers and their newborns. However, since the  
14 system allows health workers to access this data, they will be in-charge of following up on such  
15 cases to avoid unnecessary delays and such unintended consequences.  
16  
17  
18  
19  
20  
21  
22  
23  
24  
25  
26  
27  
28

## 29 **5. Conclusion**

30  
31  
32 The study outlined in this protocol will assess the added value of using a CHV decision-support  
33 module of mPAMANECH in reducing maternal complications and newborn deaths in the  
34 informal settlements of Nairobi, Kenya. The study's findings will contribute to the body of  
35 knowledge on the effectiveness of mHealth innovations in improving maternal, newborn and  
36 child health services and outcomes in urban informal settlements. Successful execution of the  
37 protocol will generate evidence on the effectiveness, if any, of the system. Based on the positive  
38 lessons learned, this project will provide a system for adoption by the local and central  
39 governments, for resource limited communities.  
40  
41  
42  
43  
44  
45  
46

## 47 **6. Competing interests statement:**

48  
49 None declared.  
50

## 51 **7. Authors' contributions:**

1  
2  
3 PB, CK, EK, AKZ conceived the project and its design and participated in refining the manuscript. MO  
4 contributed to the refining of the design. PB drafted the manuscript. All authors read and approved the  
5 final manuscript.  
6  
7

### 8. Funding statement:

9  
10  
11 This project is supported by the County Innovation Challenge Fund for Kenya (GR: CICF-INN-R2-088).  
12 The funder had no role in the decision to write and publish this protocol.  
13  
14

### 9. References:

- 15
- 16
- 17
- 18 1. Say, L., et al., *Global causes of maternal death: a WHO systematic analysis*. The Lancet Global  
19 Health, 2014.
- 20 2. Liu, L., et al., *Global, regional, and national causes of child mortality: an updated systematic*  
21 *analysis for 2010 with time trends since 2000*. The Lancet, 2012. **379**(9832): p. 2151-2161.
- 22 3. WHO, *Neonatal and Perinatal Mortality: Country, Regional and Global Estimates*. 2006, World  
23 Health Organization: Geneva.
- 24 4. Jehan, I., Harris, H., Salat, S., Zeb, A., Mobeen, N., Pasha, O., McClure, M. E., Moore, J., Wright, L.  
25 L., & Goldenberg, R. L., *Neonatal mortality, risk factors and causes: a prospective population-*  
26 *based cohort study in urban Pakistan.* Bull World Health Organ, 2009. **87**(2): p. 130-138.
- 27 5. KNBS and ICF Macro, *Kenya Demographic and Health Survey 2008-09* 2010, Kenya National  
28 Bureau of Statistics (KNBS) and ICF Macro: Calverton, Maryland.
- 29 6. KNBS, *Kenya Demographic and Health Survey 2014*. 2015, Kenya National Bureau of Statistics  
30 (KNBS): Nairobi, Kenya.
- 31 7. Lehmann, U. and D. Sanders, *Community health workers: what do we know about them*. The  
32 state of the evidence on programmes, activities, costs and impact on health outcomes of using  
33 community health workers. Geneva: World Health Organization, 2007: p. 1-42.
- 34 8. Christopher, J.B., et al., *Thirty years after Alma-Ata: a systematic review of the impact of*  
35 *community health workers delivering curative interventions against malaria, pneumonia and*  
36 *diarrhoea on child mortality and morbidity in sub-Saharan Africa*. Hum Resour Health, 2011.  
37 **9**(1): p. 27.
- 38 9. Gilmore, B. and E. McAuliffe, *Effectiveness of community health workers delivering preventive*  
39 *interventions for maternal and child health in low-and middle-income countries: a systematic*  
40 *review*. BMC Public Health, 2013. **13**(1): p. 847.
- 41 10. Mumbo, H.M., et al., *Uptake of task shifting as a community strategy in Kenya*. European  
42 Scientific Journal, 2013. **9**(14).
- 43 11. Berner, E.S., *Clinical decision support systems*. 2007: Springer.
- 44 12. Kawamoto, K., et al., *Improving clinical practice using clinical decision support systems: a*  
45 *systematic review of trials to identify features critical to success*. Bmj, 2005. **330**(7494): p. 765.
- 46 13. Garg, A.X., et al., *Effects of computerized clinical decision support systems on practitioner*  
47 *performance and patient outcomes: a systematic review*. Jama, 2005. **293**(10): p. 1223-1238.
- 48 14. Bates, D.W., et al., *Ten commandments for effective clinical decision support: making the*  
49 *practice of evidence-based medicine a reality*. Journal of the American Medical Informatics  
50 Association, 2003. **10**(6): p. 523-530.  
51  
52  
53  
54  
55  
56  
57  
58  
59  
60

15. Agarwal, S., et al., *Guidelines for reporting of health interventions using mobile phones: mobile health (mHealth) evidence reporting and assessment (mERA) checklist*. *bmj*, 2016. **352**: p. i1174.
16. Blaya, J.A., H.S. Fraser, and B. Holt, *E-health technologies show promise in developing countries*. *Health Affairs*, 2010. **29**(2): p. 244-251.
17. Vodafone, *Connected Worker: How mobile technology can improve working life in emerging economies*  
[http://www.vodafone.com/content/dam/sustainability/pdfs/vodafone\\_connected\\_worker.pdf](http://www.vodafone.com/content/dam/sustainability/pdfs/vodafone_connected_worker.pdf), 2015.
18. Lucas, H., *Information and communications technology for future health systems in developing countries*. *Social Science & Medicine*, 2008. **66**(10): p. 2122-2132.
19. Lund, S., et al., *Mobile phone intervention reduces perinatal mortality in zanzibar: secondary outcomes of a cluster randomized controlled trial*. *JMIR mHealth and uHealth*, 2014. **2**(1): p. e15.
20. Noordam, A.C., et al., *Improvement of maternal health services through the use of mobile phones*. *Tropical Medicine & International Health*, 2011. **16**(5): p. 622-626.
21. Free, C., et al., *The effectiveness of mobile-health technology-based health behaviour change or disease management interventions for health care consumers: a systematic review*. *PLoS med*, 2013. **10**(1): p. e1001362.
22. Braun, R., et al., *Community health workers and mobile technology: a systematic review of the literature*. *PloS one*, 2013. **8**(6): p. e65772.
23. Källander, K., et al., *Mobile health (mHealth) approaches and lessons for increased performance and retention of community health workers in low-and middle-income countries: a review*. *Journal of medical Internet research*, 2013. **15**(1): p. e17.
24. Bakibinga, P., et al., *The effect of enhanced public-private partnerships on Maternal, Newborn and child Health Services and outcomes in Nairobi-Kenya: the PAMANECH quasi-experimental research protocol*. *BMJ open*, 2014. **4**(10): p. e006608.
25. APHRC, *Harnessing Public-Private Partnership to improve Maternal, Newborn and Child Healthservices and outcomes in Nairobi slum settlement: End of Grant report*. 2016, African Population & Health Research Center (APHRC): Nairobi, Kenya.
26. Baqui, A.H., et al., *Effectiveness of home-based management of newborn infections by community health workers in rural Bangladesh*. *The Pediatric infectious disease journal*, 2009. **28**(4): p. 304.
27. Waiswa, P., et al., *Effect of the Uganda Newborn Study on care-seeking and care practices: a cluster-randomised controlled trial*. *Glob Health Action*, 2014. **7**: p. 24584.
28. MOH, *Community Health Volunteers (CHVs): Basic Modules Handbook*, ed. M.o.H. Division of Community Health Services, Kenya. 2013, Nairobi, Kenya.
29. RedCross-Kenya. *Training CHWs in Kenya – Lessons Learned*. 2014 [cited 2016 25/8/16].
30. WHO. *Mother and Child Card: Danger Signs*. 2012 [cited 2016 13/8/16].

1  
2  
3  
4  
5  
6  
7  
8  
9  
10  
11  
12  
13  
14  
15  
16  
17  
18  
19  
20  
21  
22  
23  
24  
25  
26  
27  
28  
29  
30  
31  
32  
33  
34  
35  
36  
37  
38  
39  
40  
41  
42  
43  
44  
45  
46  
47  
48  
49  
50  
51  
52  
53  
54  
55  
56  
57  
58  
59  
60

For peer review only



Figure 1, Key Outcomes:

| Domain of Inquiry                                                                        | Key Outcome Indicators                                                                                                                                                                                                                                                                                                                                                                                                                                                                                                                                                                                                                                                                                                                                                                |
|------------------------------------------------------------------------------------------|---------------------------------------------------------------------------------------------------------------------------------------------------------------------------------------------------------------------------------------------------------------------------------------------------------------------------------------------------------------------------------------------------------------------------------------------------------------------------------------------------------------------------------------------------------------------------------------------------------------------------------------------------------------------------------------------------------------------------------------------------------------------------------------|
| Assess the feasibility and acceptability of using a decision-support module of mPAMANECH | <ul style="list-style-type: none"> <li>- Percentage time for which the system is down on a monthly basis</li> <li>- Number of CHVs effectively using the decision support tool</li> <li>- Proportion of CHVs able to identify at least 4 danger signs among neonates</li> <li>- Proportion of CHVs able to identify at least 1 danger sign among neonates</li> <li>- Proportion of CHVs able to identify at least 2 post-partum complications</li> <li>- Percentage of correct referral decisions by CHVs for post-partum mothers with complications</li> <li>- Percentage of correct referral decisions by CHVs for neonates with danger signs</li> <li>- Proportion of pregnant women referred for ANC by CHVs</li> <li>- Proportion of mothers referred for PNC by CHVs</li> </ul> |
| Determine the decision-support platform's effect on utilization of MNH services          | <ul style="list-style-type: none"> <li>- Proportion of women attending at least 4 ANCs</li> <li>- Proportion of all mothers attending at least 2 PNCs</li> <li>- Proportion of deliveries assisted by trained personnel</li> <li>- Percentage of women who accessed first ANC within the 1st trimester</li> <li>- Proportion of women referred for post-partum family planning</li> <li>- Proportion of newborns with at least one danger sign referred by CHVs</li> <li>- Proportion of low birth weight newborns referred</li> <li>- Proportion of women lost during follow up</li> <li>- Proportion of newborns lost during follow up</li> </ul>                                                                                                                                   |

Figure 1: Key Outcome measures

30x39mm (300 x 300 DPI)

only

Figure 2, Theory of Change

CHV DSS-Theory of Change

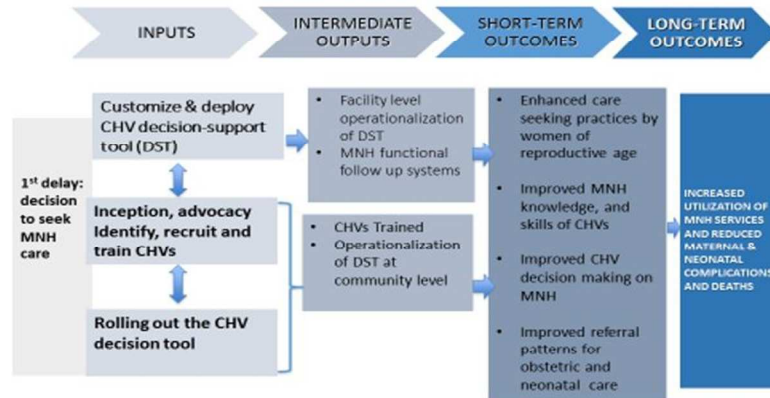

Figure 2: Theory of change

78x40mm (300 x 300 DPI)

review only

1  
2  
3  
4  
5  
6  
7  
8  
9  
10  
11  
12  
13  
14  
15  
16  
17  
18  
19  
20  
21  
22  
23  
24  
25  
26  
27  
28  
29  
30  
31  
32  
33  
34  
35  
36  
37  
38  
39  
40  
41  
42  
43  
44  
45  
46  
47  
48  
49  
50  
51  
52  
53  
54  
55  
56  
57  
58  
59  
60

Figure 3, Mobile Data Gathering Platform

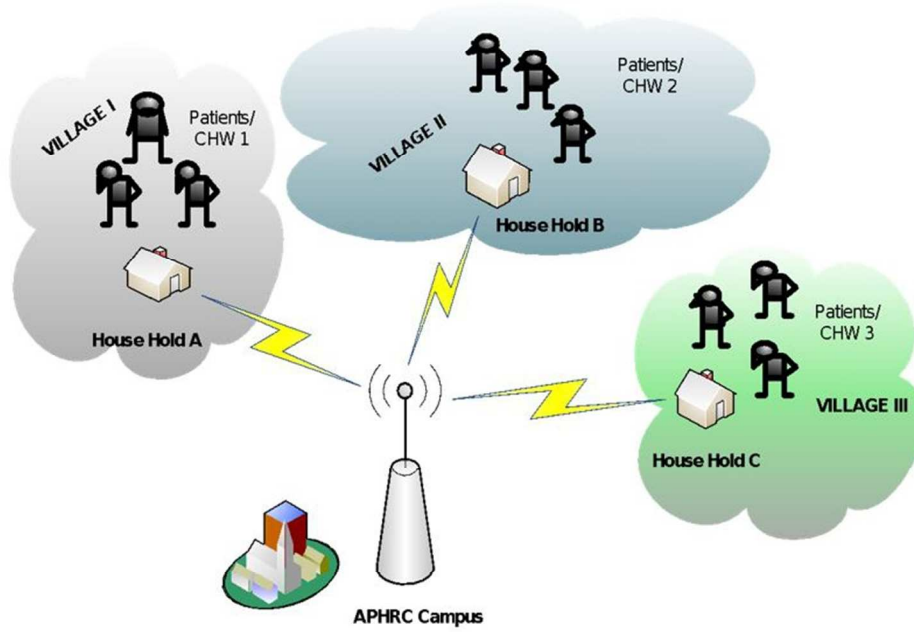

Figure 3: The system

72x53mm (300 x 300 DPI)

view only

1  
2  
3  
4  
5  
6  
7  
8  
9  
10  
11  
12  
13  
14  
15  
16  
17  
18  
19  
20  
21  
22  
23  
24  
25  
26  
27  
28  
29  
30  
31  
32  
33  
34  
35  
36  
37  
38  
39  
40  
41  
42  
43  
44  
45  
46  
47  
48  
49  
50  
51  
52  
53  
54  
55  
56  
57  
58  
59  
60

Figure 4: How the system works

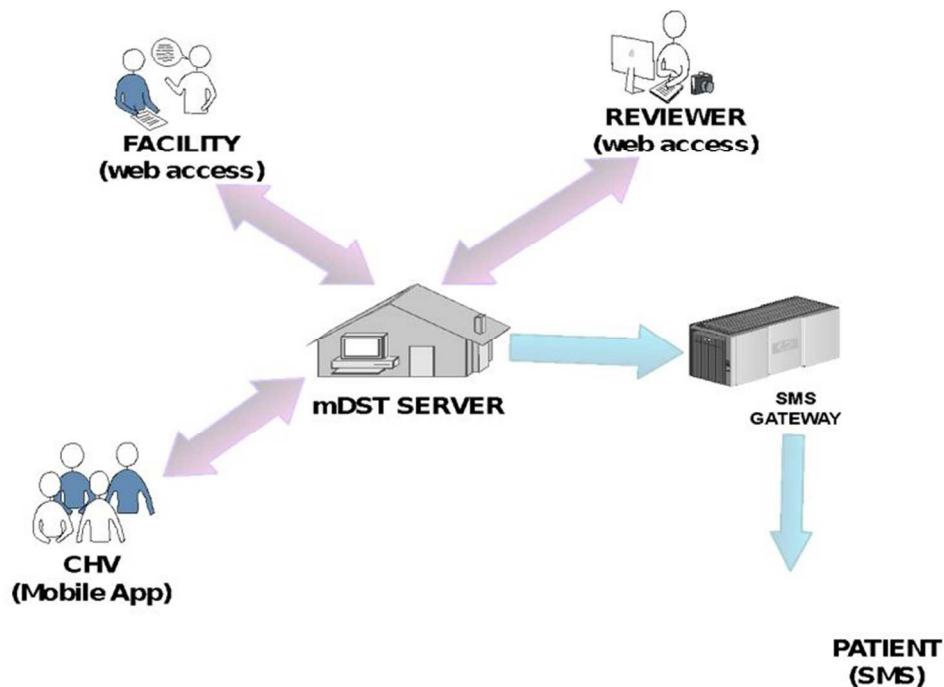

Figure 4: How the system works

70x53mm (300 x 300 DPI)

ew only

Figure 5, Project timeline

| CHV Decision Support Application: Pilot study |      |    |    |      |    |    |    |
|-----------------------------------------------|------|----|----|------|----|----|----|
| Activities                                    | 2016 |    |    | 2017 |    |    |    |
|                                               | Q1   | Q2 | Q3 | Q4   | Q5 | Q6 | Q7 |
| Inception period                              | ■    |    |    |      |    |    |    |
| Seek ethical approval                         |      | ■  |    |      |    |    |    |
| Baseline                                      |      |    | ■  |      |    |    |    |
| Recruit & train field team                    |      |    | ■  |      |    |    | ■  |
| Conduct Baseline                              |      |    | ■  |      |    |    | ■  |
| Conduct Endline                               |      |    | ■  |      |    |    | ■  |
| Data cleaning                                 |      |    | ■  |      |    |    | ■  |
| Data analysis and interpretation              |      |    | ■  |      |    |    | ■  |
| Scientific write up on baseline               |      |    | ■  |      |    |    | ■  |
| Scientific write up on endline                |      |    | ■  |      |    |    | ■  |
| Develop Decision Support System               |      | ■  |    |      |    |    |    |
| Training of CHWs                              |      |    |    |      |    |    |    |
| Training of DHMTs                             |      |    |    |      |    |    |    |

Figure 5: Project timeline

54x48mm (300 x 300 DPI)

only

|    |                                                                                               |                                                                                                                                                                                                              |                                                                                                                                                                                                                                                                                                                                   |                                                                                                                                                                               |  |
|----|-----------------------------------------------------------------------------------------------|--------------------------------------------------------------------------------------------------------------------------------------------------------------------------------------------------------------|-----------------------------------------------------------------------------------------------------------------------------------------------------------------------------------------------------------------------------------------------------------------------------------------------------------------------------------|-------------------------------------------------------------------------------------------------------------------------------------------------------------------------------|--|
| 1  |                                                                                               |                                                                                                                                                                                                              |                                                                                                                                                                                                                                                                                                                                   |                                                                                                                                                                               |  |
| 2  |                                                                                               |                                                                                                                                                                                                              |                                                                                                                                                                                                                                                                                                                                   |                                                                                                                                                                               |  |
| 3  |                                                                                               |                                                                                                                                                                                                              |                                                                                                                                                                                                                                                                                                                                   |                                                                                                                                                                               |  |
| 4  |                                                                                               |                                                                                                                                                                                                              |                                                                                                                                                                                                                                                                                                                                   |                                                                                                                                                                               |  |
| 5  | Project Title                                                                                 | Using a Decision-Support Smartphone application to enhance Community Health Volunteers' effectiveness in reducing Maternal complications and reducing Newborn Deaths in the informal settlements of Nairobi, |                                                                                                                                                                                                                                                                                                                                   |                                                                                                                                                                               |  |
| 6  |                                                                                               |                                                                                                                                                                                                              |                                                                                                                                                                                                                                                                                                                                   |                                                                                                                                                                               |  |
| 7  |                                                                                               |                                                                                                                                                                                                              |                                                                                                                                                                                                                                                                                                                                   |                                                                                                                                                                               |  |
| 8  |                                                                                               | Objectively Verifiable Indicators                                                                                                                                                                            |                                                                                                                                                                                                                                                                                                                                   |                                                                                                                                                                               |  |
| 9  | Domain of inquiry                                                                             | Indicators                                                                                                                                                                                                   | Method of calculation                                                                                                                                                                                                                                                                                                             |                                                                                                                                                                               |  |
| 10 | 1. Assess the feasibility and acceptability of using a decision-support module of mPAMANECH   | Percentage time for which the system is down on a monthly basis                                                                                                                                              | (Numerator: Number of times (in minutes) when the system is down<br>Denominator: Total active time in a month. Down time defined as 30 minutes of hanging and Active time as time without hitches) * 100                                                                                                                          |                                                                                                                                                                               |  |
| 11 |                                                                                               | Number of CHVs effectively using the decision support tool                                                                                                                                                   | Numerator: Number of CHVs able to either correctly refer or manage clients at home (target is 50 CHVs).<br>Within the system, on a quarterly basis we will be able to generate reports on decisions made by the CHVs. These will also be compared to the control site that will only have a paper based system of data collection |                                                                                                                                                                               |  |
| 12 |                                                                                               |                                                                                                                                                                                                              | Proportion of CHVs able to identify at least 4 danger signs among neonates                                                                                                                                                                                                                                                        | Numerator: Number of CHVs able to identify at least 4 danger signs among neonates (aged upto 28 days). Denominator: Total number of CHVs in the selected CUs (total 50 CHVs). |  |
| 13 |                                                                                               |                                                                                                                                                                                                              | Proportion of CHVs able to identify at least 2 post-partum complications                                                                                                                                                                                                                                                          | Numerator: Number of CHVs able to identify at least 2 post-partum complications. Denominator : Total number of CHVs in selected Cus (total 50 CHVs)                           |  |
| 14 |                                                                                               |                                                                                                                                                                                                              | Percentage of correct referral decisions by CHVs for post-partum mothers with complications                                                                                                                                                                                                                                       | (Numerator: Number of correct referrals by CHVs for post-partum mothers with complications. Denominator: Total number of postpartum women referred.) * 100                    |  |
| 15 | 2. Determine the decision-support platform's effect on utilization of MNH services            | Percentage of correct referral decisions by CHVs for neonates (aged upto 28 days) with danger signs                                                                                                          | (Numerator: number of correct referrals by CHVs for neonates (aged upto 28 days) with danger signs. Denominator: Total number of neonate referrals) * 100                                                                                                                                                                         |                                                                                                                                                                               |  |
| 16 |                                                                                               | Proportion of pregnant women referred for ANC by CHVs                                                                                                                                                        | Numerator: Number of pregnant women referred for ANC to selected health facilities by CHVs Denominator: Total number of women-pregnant seen by CHVs                                                                                                                                                                               |                                                                                                                                                                               |  |
| 17 |                                                                                               | Proportion of mothers referred for PNC by CHVs                                                                                                                                                               | Numerator: Number of post-delivery women referred for PNC to selected health facilities by CHVs. Denominator: Total number of deliveries in selected facilities and at home                                                                                                                                                       |                                                                                                                                                                               |  |
| 18 |                                                                                               | Proportion of women attending at least 4 ANC                                                                                                                                                                 | Numerator: Number of pregnant women attending 4 or more ANC visits in project sites. Denominator: Total number of pregnant women seeking ANC services in the selected health facilities                                                                                                                                           |                                                                                                                                                                               |  |
| 19 |                                                                                               | Proportion of all mothers attending at least 2 PNCs                                                                                                                                                          | Numerator: Number of mothers attending at least 2 PNCs in project sites. Denominator: Total number of postpartum women seeking PNC services in the selected health facilities.                                                                                                                                                    |                                                                                                                                                                               |  |
| 20 | Proportion of deliveries assisted by trained personnel                                        | Numerator: Number of assisted deliveries by trained personnel (at home or at the facility). Denominator: Total number of deliveries in the facilities and CUs covered by project                             |                                                                                                                                                                                                                                                                                                                                   |                                                                                                                                                                               |  |
| 21 |                                                                                               | Percentage of women who accessed first ANC within the 1st trimester                                                                                                                                          | (Numerator: Number of women attending the first ANC within the first semester. Denominator: Total number of women attending ANC in project sites) * 100                                                                                                                                                                           |                                                                                                                                                                               |  |
| 22 |                                                                                               | Proportion of women referred by CHVs for post-partum family planning                                                                                                                                         | Numerator: Number of post-partum women referred and seen at facilities for family planning. Denominator: Total number of women referred in the facilities and Cus in project sites                                                                                                                                                |                                                                                                                                                                               |  |
| 23 | Proportion of newborns (aged upto 28 days) with atleast one danger sign referred by CHV       | Numerator: Number of CHVs able to identify at least 4 danger signs among neonates (aged upto 28 days). Denominator: Total number of CHVs in the selected CUs (total 50 CHVs).                                |                                                                                                                                                                                                                                                                                                                                   |                                                                                                                                                                               |  |
| 24 |                                                                                               | Proportion of low birth weight newborns (< 2500g) referred                                                                                                                                                   | Numerator: Number of low birth weight newborns (< 2500g) referred to selected health facilities. Denominator: Total number of live birth weighted in selected facilities                                                                                                                                                          |                                                                                                                                                                               |  |
| 25 |                                                                                               | Proportion of women lost during follow up                                                                                                                                                                    | Numerator: Number of women referred by CHVs who fail to report to the selected facilities. Denominator: Total number of women referred by CHV                                                                                                                                                                                     |                                                                                                                                                                               |  |
| 26 | Proportion of newborns (aged upto 28 days) who failed to report to selected health facilities | Numerator: Number of newborns (aged upto 28 days) who failed to report to selected health facilities. Denominator: Total number of newborns (aged upto 28 days) referred by CHVs                             |                                                                                                                                                                                                                                                                                                                                   |                                                                                                                                                                               |  |
| 27 |                                                                                               |                                                                                                                                                                                                              |                                                                                                                                                                                                                                                                                                                                   |                                                                                                                                                                               |  |
| 28 |                                                                                               |                                                                                                                                                                                                              |                                                                                                                                                                                                                                                                                                                                   |                                                                                                                                                                               |  |
| 29 |                                                                                               |                                                                                                                                                                                                              |                                                                                                                                                                                                                                                                                                                                   |                                                                                                                                                                               |  |
| 30 |                                                                                               |                                                                                                                                                                                                              |                                                                                                                                                                                                                                                                                                                                   |                                                                                                                                                                               |  |
| 31 |                                                                                               |                                                                                                                                                                                                              |                                                                                                                                                                                                                                                                                                                                   |                                                                                                                                                                               |  |
| 32 |                                                                                               |                                                                                                                                                                                                              |                                                                                                                                                                                                                                                                                                                                   |                                                                                                                                                                               |  |
| 33 |                                                                                               |                                                                                                                                                                                                              |                                                                                                                                                                                                                                                                                                                                   |                                                                                                                                                                               |  |
| 34 |                                                                                               |                                                                                                                                                                                                              |                                                                                                                                                                                                                                                                                                                                   |                                                                                                                                                                               |  |
| 35 |                                                                                               |                                                                                                                                                                                                              |                                                                                                                                                                                                                                                                                                                                   |                                                                                                                                                                               |  |
| 36 |                                                                                               |                                                                                                                                                                                                              |                                                                                                                                                                                                                                                                                                                                   |                                                                                                                                                                               |  |
| 37 |                                                                                               |                                                                                                                                                                                                              |                                                                                                                                                                                                                                                                                                                                   |                                                                                                                                                                               |  |
| 38 |                                                                                               |                                                                                                                                                                                                              |                                                                                                                                                                                                                                                                                                                                   |                                                                                                                                                                               |  |
| 39 |                                                                                               |                                                                                                                                                                                                              |                                                                                                                                                                                                                                                                                                                                   |                                                                                                                                                                               |  |
| 40 |                                                                                               |                                                                                                                                                                                                              |                                                                                                                                                                                                                                                                                                                                   |                                                                                                                                                                               |  |
| 41 |                                                                                               |                                                                                                                                                                                                              |                                                                                                                                                                                                                                                                                                                                   |                                                                                                                                                                               |  |
| 42 |                                                                                               |                                                                                                                                                                                                              |                                                                                                                                                                                                                                                                                                                                   |                                                                                                                                                                               |  |
| 43 |                                                                                               |                                                                                                                                                                                                              |                                                                                                                                                                                                                                                                                                                                   |                                                                                                                                                                               |  |
| 44 |                                                                                               |                                                                                                                                                                                                              |                                                                                                                                                                                                                                                                                                                                   |                                                                                                                                                                               |  |
| 45 |                                                                                               |                                                                                                                                                                                                              |                                                                                                                                                                                                                                                                                                                                   |                                                                                                                                                                               |  |
| 46 |                                                                                               |                                                                                                                                                                                                              |                                                                                                                                                                                                                                                                                                                                   |                                                                                                                                                                               |  |
| 47 |                                                                                               |                                                                                                                                                                                                              |                                                                                                                                                                                                                                                                                                                                   |                                                                                                                                                                               |  |
| 48 |                                                                                               |                                                                                                                                                                                                              |                                                                                                                                                                                                                                                                                                                                   |                                                                                                                                                                               |  |
| 49 |                                                                                               |                                                                                                                                                                                                              |                                                                                                                                                                                                                                                                                                                                   |                                                                                                                                                                               |  |
| 50 |                                                                                               |                                                                                                                                                                                                              |                                                                                                                                                                                                                                                                                                                                   |                                                                                                                                                                               |  |
| 51 |                                                                                               |                                                                                                                                                                                                              |                                                                                                                                                                                                                                                                                                                                   |                                                                                                                                                                               |  |
| 52 |                                                                                               |                                                                                                                                                                                                              |                                                                                                                                                                                                                                                                                                                                   |                                                                                                                                                                               |  |
| 53 |                                                                                               |                                                                                                                                                                                                              |                                                                                                                                                                                                                                                                                                                                   |                                                                                                                                                                               |  |
| 54 |                                                                                               |                                                                                                                                                                                                              |                                                                                                                                                                                                                                                                                                                                   |                                                                                                                                                                               |  |
| 55 |                                                                                               |                                                                                                                                                                                                              |                                                                                                                                                                                                                                                                                                                                   |                                                                                                                                                                               |  |
| 56 |                                                                                               |                                                                                                                                                                                                              |                                                                                                                                                                                                                                                                                                                                   |                                                                                                                                                                               |  |
| 57 |                                                                                               |                                                                                                                                                                                                              |                                                                                                                                                                                                                                                                                                                                   |                                                                                                                                                                               |  |
| 58 |                                                                                               |                                                                                                                                                                                                              |                                                                                                                                                                                                                                                                                                                                   |                                                                                                                                                                               |  |
| 59 |                                                                                               |                                                                                                                                                                                                              |                                                                                                                                                                                                                                                                                                                                   |                                                                                                                                                                               |  |
| 60 |                                                                                               |                                                                                                                                                                                                              |                                                                                                                                                                                                                                                                                                                                   |                                                                                                                                                                               |  |

# BMJ Open

**The role of a decision-support smartphone application in enhancing Community Health Volunteers' effectiveness to improve maternal and newborn outcomes in Nairobi, Kenya: a quasi-experimental research protocol**

|                                 |                                                                                                                                                                                                                                                                                                                                                                                                                                                                                                               |
|---------------------------------|---------------------------------------------------------------------------------------------------------------------------------------------------------------------------------------------------------------------------------------------------------------------------------------------------------------------------------------------------------------------------------------------------------------------------------------------------------------------------------------------------------------|
| Journal:                        | <i>BMJ Open</i>                                                                                                                                                                                                                                                                                                                                                                                                                                                                                               |
| Manuscript ID                   | bmjopen-2016-014896.R2                                                                                                                                                                                                                                                                                                                                                                                                                                                                                        |
| Article Type:                   | Protocol                                                                                                                                                                                                                                                                                                                                                                                                                                                                                                      |
| Date Submitted by the Author:   | 05-May-2017                                                                                                                                                                                                                                                                                                                                                                                                                                                                                                   |
| Complete List of Authors:       | Bakibinga, Pauline; African Population and Health Research Center, Health Challenges and Systems Program<br>Kamande, Eva; African Population and Health Research Center, Health Challenges and Systems<br>Omuya, Milka; African Population and Health Research Center, Health Challenges and Systems<br>Ziraba, Abdhalah; African Population and Health Research Center, Health Challenges and Systems<br>Kyobutungi, Catherine; African Population and Health Research Center, Health Challenges and Systems |
| <b>Primary Subject Heading</b>: | Health services research                                                                                                                                                                                                                                                                                                                                                                                                                                                                                      |
| Secondary Subject Heading:      | Public health, Health informatics                                                                                                                                                                                                                                                                                                                                                                                                                                                                             |
| Keywords:                       | Decision-Support, Maternal and Newborn Health, Community Health Volunteers, Slums, Kenya                                                                                                                                                                                                                                                                                                                                                                                                                      |
|                                 |                                                                                                                                                                                                                                                                                                                                                                                                                                                                                                               |

SCHOLARONE™  
Manuscripts

1  
2  
3 **The role of a decision-support smartphone application in enhancing Community Health**  
4  
5 **Volunteers' effectiveness to improve maternal and newborn outcomes in Nairobi, Kenya: a quasi-**  
6 **experimental research protocol**  
7  
8

9  
10 **Pauline Bakibinga<sup>1\*</sup>, Eva Kamande<sup>2</sup>, Milka Omuya<sup>3</sup>, Abdhalah K Ziraba<sup>4</sup>, & Catherine**  
11 **Kyobutungi<sup>5</sup>**  
12

13  
14  
15 Institutional Affiliation-Health Challenges and Systems Research Program, African Population & Health  
16 Research Center, Manga Close, Off Kirawa Road, P.O. Box 10787-00100, Nairobi, Kenya  
17  
18  
19

20  
21  
22  
23  
24 P. Bakibinga email: [paulabak80@gmail.com](mailto:paulabak80@gmail.com)  
25  
26

27 \*Corresponding author  
28  
29  
30  
31  
32  
33  
34  
35  
36  
37  
38  
39  
40  
41  
42  
43  
44  
45  
46  
47  
48  
49  
50  
51  
52  
53  
54  
55  
56  
57  
58  
59  
60



**Abstract:****Introduction;**

Improving maternal and newborn survival remain major aspirations for many countries in the global south. Slum settlements, a result of rapid urbanization in many developing countries including Kenya, exhibit high levels of maternal and neonatal mortality. There are limited referral mechanisms for sick neonates and their mothers from the community to health care facilities with ability to provide adequate care. In this study we specifically plan to develop and assess the added value of having community health volunteers (CHVs) use smartphones to identify and track mothers and children in a bid to reduce pregnancy-related complications and newborn deaths in the urban slums of Kamukunji sub-County in Nairobi, Kenya.

**Methods and analysis;**

A quasi-experimental study. We are implementing an innovative, m-health application known as mobile-Partnership for Maternal, Newborn and Child Health (mPAMANECH) which uses dynamic mobile phone and web-portal solutions, to enable CHVs make timely decisions on the best course of action in their management of mothers and newborns at community level. The application is based on existing guidelines and protocols in use by CHVs. Currently, CHVs, conduct weekly home visits and make decisions from memory or using unwieldy manual tools, and thus prone to making errors. mPAMANECH has an in-built algorithm that makes it easier, faster and more likely for CHVs to make the right management decision. We are working with a network of selected CHVs and maternity centres to pilot test the tool. To measure the impact of the intervention, baseline and endline surveys will be conducted. Data will be obtained through qualitative and quantitative methods.

**Ethics and dissemination.**

Ethical approval for the study was obtained from the African Medical Research Foundation. Key messages from the results will be packaged and disseminated through meetings, conference presentations, reports, factsheets and academic publications to facilitate uptake by policy makers.

*Keywords: Decision-Support; Community Health Volunteers, Maternal and Newborn Health; Slums; Kenya*

## Strengths and Limitations

- The project seeks to address a critical challenge in the health care system in a slum context:

identification and referral of ill mothers and newborns.

- It utilises the existing CHV work tools and mobile phone technology to show how an evidence based intervention can improve health outcomes at community level.

-A potential harmful unintended consequence stems from the fact that CHVs are not medically trained and as such could make a decision to treat at home, rather than refer (even when the system advises otherwise) with possible negative health consequences for the mothers and their newborns.

-However, since the system allows health workers to access this data, they will be in-charge of following up on such cases to avoid unnecessary delays and such unintended consequences.

## 1. Introduction:

Annually, close to 300,000 women die from maternal causes, 3.3 million children are stillborn while an additional 3.3 million die within the first month of life [1-3]. A vast majority of these deaths occur in sub-Saharan African and South Asia. Most maternal and newborn deaths are due to causes directly related to pregnancy and childbirth [1, 2, 4]. Most of these causes are preventable with existing cost-effective interventions. Kenya has made some progress in improving maternal and newborn survival over the years. Maternal mortality has progressively reduced from 488/100,000 to 362/100,000 between 2008/09 and 2014. Neonatal mortality has reduced from 31 to 22 deaths per 1000 live births, between 2008/9 and 2014, [5, 6]. Neonatal deaths account for about 60% of all infant deaths in Kenya [6]. Despite the existence and knowledge about simple strategies and techniques to reduce maternal and newborn deaths, these interventions are not up to scale due to inadequacy of health care facilities, trained personnel, information, poor referral systems and pervasive poverty.

### Community Health Volunteers

The need to ensure universal health coverage amidst a global health care workers crisis saw the identification of community health volunteers (CHVs) as a critical alternative and workforce at the community level [7]. CHVs are volunteers identified from communities that they reside in and offered a few days' basic training based on a set curriculum before they are assigned community health promotion roles. CHVs belong to established community units with a responsibility of making weekly home visits to households within designated geographical areas. CHVs were identified under Kenya's Community Health Strategy as a means of alleviating the healthcare worker crisis. Under the strategy, CHVs are supervised by Community Health Extension Workers (CHEWs). To date, CHVs continue to bridge the critical gap between

1  
2  
3 communities and the formal health system, and many positive lessons have been learned in  
4  
5 Kenya and other parts of the world [8-10]. CHVs in Kenya, like in many emerging economies,  
6  
7 are responsible for the majority of grassroots health care delivery, and as such, continue to play a  
8  
9 very critical role in primary health care delivery.  
10  
11

### 12 **Decision-support systems**

13  
14 Clinical decision support (CDS) refer to tools used to improve decision-making in the patient  
15  
16 care workflow [11]. CDS provides clinicians, staff, patients or other individuals with knowledge  
17  
18 and person-specific information, intelligently filtered or presented at appropriate times, to  
19  
20 enhance health and health care [12, 13]. These tools include computerized alerts and reminders  
21  
22 to care providers and patients; clinical guidelines; condition-specific order sets; focused patient  
23  
24 data reports and summaries; documentation templates; diagnostic support, and contextually  
25  
26 relevant reference information, among other tools [14]. They are beneficial in reducing errors,  
27  
28 increasing quality of care and improving efficiency.  
29  
30  
31  
32  
33

### 34 **Mobile technology for health**

35  
36 Mobile technologies have the potential to bridge systemic gaps needed to improve access to and  
37  
38 use of health services, particularly among underserved populations [15]. Worldwide, the use of  
39  
40 mobile and/or electronic devices to support both medical and public health practice and research  
41  
42 (mHealth) is increasingly being appreciated [16-19]. The high and ever growing mobile  
43  
44 penetration coupled with investments from technology companies that provide accessible  
45  
46 platforms onto which innovations can establish and offer value-based products [17]. Innovations  
47  
48 include mobile phone platforms/applications and micro-insurance packages. Given the nature  
49  
50 and tight timeframes of most obstetric and neonatal emergencies, which more often than not  
51  
52 demand quick access to quality care at short notice, mobile phone innovations are a cheap and  
53  
54  
55  
56  
57  
58  
59  
60

1  
2  
3 fast solution especially in areas with poor healthcare infrastructure which have shown  
4  
5 improvements in maternal and child health outcomes [19, 20]. The majority of innovations on  
6  
7 the market are tailored towards promoting reproductive, maternal, and child health [16, 21]. In  
8  
9 addition, various projects have been designed and evaluated on CHVs use of mobile technology  
10  
11 to deliver interventions [22, 23]. Decision-support systems have been highlighted as a critical  
12  
13 factor in reducing errors in evidence-based clinical practice. For clinicians, studies have  
14  
15 demonstrated that computerized decision support systems can be used to improve compliance to  
16  
17 practice guidelines [12, 13]. Given the limited training obtained and skills that the CHVs  
18  
19 possess, coupled with the distances they work from the clinical settings mobile information  
20  
21 technologies tools enable them to provide much needed health services.  
22  
23  
24  
25  
26  
27  
28

29 Over the last decade, more mobile and electronic information tools have been developed, tested  
30  
31 and implemented with CHVs to support their work roles. The tools help the CHVs in  
32  
33 surmounting challenges such as lack of appropriate work tools and inadequate supportive  
34  
35 supervision and training [22, 23]. These tools have been instrumental in improving access to care  
36  
37 by marginalized population groups subjected to stigma and those in hard to reach areas by  
38  
39 reducing both time and cost of travel. As such, research on CHVs' use of mHealth tools in  
40  
41 important. Several pilot projects, utilizing multiple designs and measures have been  
42  
43 implemented. The projects have reported improvements in services rendered by CHVs and the  
44  
45 related health outcomes for communities. In sub-Saharan Africa, most of the interventions have  
46  
47 demonstrated improvements in the CHVs' delivery of maternal, newborn and child health,  
48  
49 Tuberculosis and sexual and reproductive health services, among others [20, 22]. The  
50  
51 innovations largely use SMS and hotlines enabling mothers to access vital information and  
52  
53  
54  
55  
56  
57  
58  
59  
60

1  
2  
3 timely referrals as a result of better and faster communication and transport. Available evidence  
4 shows the usefulness of mHealth tools in facilitation of compliance with practice guidelines and  
5 process improvement [22]. However, many of the interventions have been limited  
6 methodologically by their inability to demonstrate effectiveness and or impact related to patient  
7 outcomes. In addition a lack of use of nationally accepted guidelines and open source tools limits  
8 the scalability of these interventions. In addition, available literature does not provide cost  
9 estimates necessary for delivery of program targets. Furthermore, a top to bottom approach that  
10 does not incorporate the ideas of the CHVs in the development of the tools is a major  
11 impediment as successful projects use the CHVs as experts in the design and management of  
12 their interventions [22].  
13  
14  
15  
16  
17  
18  
19  
20  
21  
22  
23  
24  
25  
26  
27  
28  
29  
30  
31

32 The African Population and Health Research Center (APHRC) has implemented a health systems  
33 strengthening project, Partnership for Maternal, Newborn and Child Health (PAMANECH) in  
34 Korogocho and Viwandani informal settlements of Nairobi, Kenya [24]. The project sought to  
35 strengthen the healthcare delivery system in the urban informal settlements to be more  
36 responsive to the health needs of mothers and their children through enhanced service delivery  
37 public-private partnerships. In a bid to improve the health management information system, an  
38 innovative mHealth application, was developed. The mPAMANECH application was developed  
39 as an integrated data capture tool running as a mobile app with selected reporting forms for  
40 CHVs in Kenya. It operates in an interconnected network of CHVs and health facilities within a  
41 defined local system. It is designed to replace the numerous paper-based forms that do not allow  
42 integration of patient data from the community to the health facility and back for better referral  
43  
44  
45  
46  
47  
48  
49  
50  
51  
52  
53  
54  
55  
56  
57  
58  
59  
60

1  
2  
3 and management of patients. This system has been seen to improve the reporting abilities of  
4  
5 CHVs as it is less cumbersome than the paper-based system and enhanced data quality as it has a  
6  
7 function that limits saving data until all necessary fields are filled in [25]. In addition, the CHEW  
8  
9 can access a CHV's data remotely without having to wait for the end of the month for the CHV  
10  
11 summaries. The desire to improve the functionality of the existing system to include a decision  
12  
13 support function provides the basis on the new project.  
14  
15

16  
17 This project attempts to bridge this gap by incorporating CHV views, utilizing the tools approved  
18  
19 by the Ministry of Health and allowing for assessment of health outcomes in the design and  
20  
21 implementation of the project. The decision support system is developed from open source tools.  
22  
23 In addition, a cost effectiveness analysis would be conducted to inform county and national  
24  
25 implementation plans regarding the necessary investments for set up and maintenance.  
26  
27  
28  
29  
30  
31

## 32 **2. Methods and Analysis**

### 33 **Research Objectives**

34  
35 The overall objective of the proposed work is to develop and validate a decision-support  
36  
37 algorithm within a mHealth application in improving maternal and newborn health outcomes in  
38  
39 urban slums in Kamukunji sub-County in Nairobi, Kenya. The project seeks to assess the added  
40  
41 value of using a CHV decision-support module of mPAMANECH in reducing prenatal and  
42  
43 postnatal maternal complications and newborn deaths.  
44  
45  
46  
47

48 Specifically the project will assess (i) the feasibility and acceptability of using a decision-support  
49  
50 module of mPAMANECH and (ii) whether decision-support platform contributes to increase in  
51  
52 utilization of MNH services. We will measure several outcomes, *figure 1* related to the two  
53  
54 specific objectives, above. The outcome measures have been used in different studies assessing  
55  
56  
57  
58  
59  
60

1  
2  
3 CHV abilities to assess and make referrals [26, 27]. Supplementary files 1, 2 and 3 show the  
4  
5 quantitative and qualitative measures under study.  
6  
7

### 8 9 10 **Conceptual framework, Theory of Change and Operationalization**

11  
12 Our innovation centres around enhancing the functionality and utility of the current  
13  
14 mPAMANECH application to include a community decision support tool to be used within a  
15  
16 local system comprised of CHVs and five maternity centres serving five slum settlements in  
17  
18 Nairobi. The decision-support module in the mPAMANECH application will supplement the  
19  
20 existing MNCH data capture modules and help in the identification of high risk facing pregnant  
21  
22 women, new mothers and newborns with complications, and to make timely and correct  
23  
24 decisions on referral for cases that need intervention. The main beneficiaries are pregnant women  
25  
26 (over 24 weeks), mothers in the immediate post-partum period and their newborns (up to 28 days  
27  
28 old).  
29  
30  
31  
32

33  
34 The use of CHVs in delivering the mobile phone based intervention and follow up by the  
35  
36 SCHMT will ensure sustained support and adherence to the intervention during pregnancy,  
37  
38 immediate postpartum and in the neonatal period. The mPAMANECH has the official 100, 513,  
39  
40 514 and 515 forms in use by CHVs and CHEWs, who supervise the CHVs [28, 29]. A dedicated  
41  
42 team of CHEWs will ensure that the intervention is delivered as expected and non-adherence  
43  
44 captured and documented. CHV adherence will be measured by the CHEWs who will provide  
45  
46 additional support, correcting CHVs but not forms. They will be used to sample some of the  
47  
48 CHVs' work. For each woman or newborn with referral symptom, seen at household level, we  
49  
50 will compare the CHEW's assessment to that of the CHV in regard to the proportion of cases for  
51  
52 whom CHWs identified and indicated correctly on their forms as requiring a referral, and the  
53  
54  
55  
56  
57  
58  
59  
60



1  
2  
3 proportion for whom a written referral was provided. This is beneficial because the review  
4 meetings are at the end of the month. The sampling of the work will enable on-going supportive  
5 supervision in order to improve the quality of the CHVs work. In addition, more assessment will  
6 be made for those referrals that will be seen at health facility level, comparing danger signs  
7 identified by the CHV to those seen by the clinician.  
8  
9

10  
11 The attributes of the solution include: 1) Use of any android devices - the entire application is  
12 operable on phones, tablets or desktops/laptops; 2) Within a linked local system – messaging is  
13 delivered internally via the portal and no extra network charges are required for messaging; 3)  
14 The application is bandwidth light and takes about 100 Kenya shillings a month per user, based  
15 on local data bundle charges. The application can work offline and auto-synchronize as soon as  
16 network connectivity is re-established; 4) Updates are automated and there is no need for an IT  
17 expert to have physical access to the device to execute a software patch or change; 5) The  
18 application has security features that protect users' confidentiality and limit access to a closed  
19 but linked local system of health facilities and CHVs with varied access rights; 6) It has the  
20 ability to limit use of other phone functionality to only allow this application to run. This helps  
21 prevent abuse of the device and promote saving on bandwidth. We aim to enhance the  
22 functionality and utility of the current mPAMANECH application to include a community  
23 decision support tool to be used within a local system comprised of selected CHVs and five  
24 maternity centres serving slum settlements in Nairobi. In the 'Operationalisation' section, we  
25 describe more on how the decision support system is expected to work.  
26  
27  
28  
29  
30  
31  
32  
33  
34  
35  
36  
37  
38  
39  
40  
41  
42  
43  
44  
45  
46  
47  
48  
49  
50  
51  
52  
53  
54  
55  
56  
57  
58  
59  
60

1  
2  
3 From our proposed theory of change, *figure 2*, we anticipate that the decision support module of  
4 mPAMANECH will assist the CHVs in the identification of high risk pregnant women, new  
5 mothers and newborns with complications, and to make timely and correct decisions on referral  
6 for cases that need intervention. With the improved knowledge and skills possessed by the CHVs  
7 more women and neonates in need of health care will be identified and referred to the necessary  
8 health facilities. As a result, there will be increase utilisation of maternal and neonatal health  
9 services and reduced maternal and neonatal complications and deaths.  
10  
11  
12  
13  
14  
15  
16  
17  
18  
19  
20  
21  
22

### 23 **Operationalisation of the Decision Support System**

24  
25  
26 The mobile decision support system (mDSS) mobile application (app) is an Android app that  
27 installs from the phone and runs as an application, *figure 3*. The app will be hosted at Google  
28 store and is accessible for download via the internet automatically to the user handset.  
29  
30  
31  
32

33  
34 Once installed, the handset and the application will be configured with the credentials of the  
35 CHV including username and password, which are linked with the operating phone number. This  
36 setup allows the system to register and associate collected records to the respective CHV; useful  
37 for reporting and analysis purposes.  
38  
39  
40  
41  
42

43  
44 The CHVs will be provided with a mobile phone running the mHealth app for data collection  
45 which is then relayed to the head office at APHRC Campus. When visiting households for data  
46 collection, by initiating a new record the system automatically picks the geolocation of the  
47 household and associates it with the record.  
48  
49  
50  
51  
52  
53  
54  
55  
56  
57  
58  
59  
60

1  
2  
3 The CHV will complete the respective form and save the information at any stage on the  
4 handset. This method allows the CHV to continue collecting more information and only submit  
5 the completed form to the server over the internet. Where the handset detects that internet  
6 connectivity is not available for one reason or the other, the completed forms will be stored in the  
7 phone and only be relayed to the server when the connectivity is established. Because the  
8 application is in communication with the server in real-time, any update of the data is  
9 immediately available to the CHVs. The application is preconfigured with danger signs for both  
10 mothers and newborns as defined by the WHO [30]. When any of the danger signs is picked by  
11 the system, the CHV is immediately prompted to refer the patient to a facility within the  
12 network.

13  
14  
15 The system is to be set up in such a way that the CHV will not be allowed to proceed and  
16 complete the forms until the referral is done. The patient's information will be available to all the  
17 facilities within the network and he/she will be able to visit any of the networked facilities for  
18 treatment. This information is also relayed to the rest of the other facilities and a record of the  
19 visit is kept in the server. Within 24 hours if the patient has not been seen in any of the  
20 networked facilities, an SMS message is relayed to the respective CHV handset. At this point,  
21 the CHV should follow up with the patient to inquire about their condition and whether they  
22 chose to honour the referral to a facility outside the network or not.

23  
24  
25 When the patient visits a facility within the network, using the household number and the name  
26 he/she will be easily identified and treated. The clinician is able to record the treatment in the  
27 patient's information, which is recorded in the server.

1  
2  
3 Both the CHV and the clinician's information are available to a reviewer in real time from the  
4 web. The reviewer's role would be to assess the CHV's reason for referral and the clinician's  
5 final diagnosis for correctness. The feedback from the reviewer will be available and shared on a  
6 monthly basis during review meetings. Every week, the CHEW, will randomly sample referrals  
7 made by each CHV to assess their correctness. This will be compared with the 'reviewers'  
8 summary.  
9  
10  
11  
12  
13  
14  
15  
16

### 17 **mDSS Solution- Key Features (figure 4)**

#### 18 **CHV (mobile App)**

19  
20  
21 Through this app, the mDSS data collection tools are accessible on the CHV mobile handset. It  
22 allows for completion and submission of the information to the mDSS Server.  
23  
24  
25  
26  
27  
28

#### 29 **mDSS Server**

30  
31  
32 A database driven web application that acts as a host for the collected information. It also has a  
33 web interface for data manipulation by the facility healthcare worker(s) and reviewer.  
34  
35  
36  
37

38 The mDSS server application incorporates an application logic component that connects with the  
39 SMS and email gateways. This allows for real-time communication of certain critical indicators  
40 to the respective recipients. For example, where a patient has not shown up at the referred  
41 facility, the CHV will be alerted.  
42  
43  
44  
45  
46  
47

#### 48 **Facility (web access)**

49  
50  
51 This module is accessible at the facility via the web. The application allows the clinician to treat  
52 the patient and record the treatment. The facility portal is accessible by facility staff to manage  
53  
54  
55  
56  
57  
58  
59  
60

1  
2  
3 referrals. The “Messages” to alert the CHVs are to be integrated with WhatsApp for effective  
4  
5 message delivery over the same mobile phone.  
6  
7

### 8 9 **Reviewer (web access)**

10  
11 This module is also accessible via the web, and provides the reviewer a view to assess both the  
12  
13 CHV referral report and the clinician’s diagnosis. It is based on this analysis that a decision is  
14  
15 measured.  
16  
17

### 18 19 **Null hypothesis:**

20  
21 Usage of a CHV decision-support module does not have an effect on utilization of MNH  
22  
23 services.  
24  
25

### 26 27 **Study Design and Sampling Strategy**

#### 28 29 **a. Study Design**

30  
31 To answer the question on effect of the decision support system, we will use a quasi-  
32  
33 experimental design with pre and post assessments to determine the impact, if any, on the MNH  
34  
35 services and selected health indicators.  
36  
37

38  
39 We will work with three community units (CUs) from which a group of 50 CHVs will serve as  
40  
41 the intervention group. Three CUs in Embakasi sub-County, with 50 CHVs will serve as the  
42  
43 control. The CUs in the control group will be geographically distant from the intervention site to  
44  
45 limit contamination. The control group will be facilitated within the normal standard of practice  
46  
47 which includes paper-based reporting. The idea is to compare access to MNH services, referral  
48  
49 practices and MNH outcomes between those with a decision-support tool with those working  
50  
51 with traditional paper-based tools.  
52  
53  
54  
55  
56  
57  
58  
59  
60

1  
2  
3 We will conduct a baseline survey and an end-line at least one year after the full implementation  
4 of the intervention. The control group will be assessed at the same time as the surveys are being  
5 conducted in the intervention group. To strengthen the case for causal inference we will also do  
6 a systematic monitoring and documentation of the intervention based on our theory of change.  
7  
8 The monitoring and documentation will also capture any other contextual factors that may  
9 influence the same outcomes as our intervention.  
10

11  
12 To answer the question on feasibility, we will conduct a mixed methods assessment of the CHVs  
13 and CHEWs. Qualitative assessments of their current work experiences with the paper based  
14 system as well as after the introduction of the mobile based system will be conducted. We will  
15 assess ease of use, challenges experienced and opportunities for improvement. These will be  
16 triangulated with their HMIS reports (paper and electronic).  
17  
18

#### 19 **b. Study Setting**

20 The intervention site covers informal settlements in Kamukunji sub County, which, like other  
21 slums, are characterized by poverty, poor coverage of social services and poor health outcomes.  
22 We will identify CUs and 5 facilities that serve the CUs. Embakasi sub-County will serve as the  
23 control site. We will identify three CUs to serve as controls.  
24  
25

#### 26 **c. Sampling**

27 The CUs in the intervention and control groups will be purposively selected based on discussions  
28 with the sub-County community strategy coordinators for Kamukunji and Embakasi. We will  
29 select CUs with the worst health indicators for both the intervention and control groups,  
30 including those serving informal settlements, and with more likelihood to benefit from the  
31 intervention.  
32

33 For the population based surveys:

1  
2  
3 ➤ **Quantitative study**

4  
5 ▪ *Study population*

6  
7  
8 The project will target households with women of reproductive age (15-49 years) in the informal  
9  
10 settlements of Kamukunji and Embakasi. It will also target health care providers in five selected  
11  
12 health facilities as well as the sub-County Health Management teams of Kamukunji, Embakasi,  
13  
14 Makadara and Nairobi City County.

15  
16  
17 A quantitative survey will be conducted focussing mainly on maternal and newborn health and  
18  
19 family planning services.

20  
21  
22 ▪ *Sample size estimation*

23  
24 The key outcome of interest is correct referral practices. Using proportion of neonates with at  
25  
26 least one danger sign referred by CHVs as the indicator, since it is representative of the target  
27  
28 population, the total sample size for each group has been estimated as 173 (346 in total). Using a  
29  
30 difference in proportion 13.3 % for neonates with danger signs referred (rising from 16.7 to  
31  
32 30%), at 95% CI for 80% power and sample proportions of 50% in the intervention and 40% in  
33  
34 the control groups, respectively, we came up with a sample size of 315. Accounting for a  
35  
36 potential non-response rate of 10% based on previous studies in similar study populations, the  
37  
38 effective sample size is 346. Using correct decisions made by CHVs (one of the indicators to be  
39  
40 measured), the sample size was estimated as 199. 346 is therefore an appropriate sample size.

41  
42  
43 ▪ *Sampling procedure*

44  
45  
46 To measure feasibility and acceptability, all the CHVs in the intervention site will be assessed, in  
47  
48 addition to an audit of the functionality of the system. We will measure the percentage time for  
49  
50 which the system is down on a monthly basis (**Numerator:** Number of times (in minutes) when  
51  
52 the system is down. **Denominator:** Total active time in a month. Down time defined as 30  
53  
54  
55  
56  
57  
58  
59  
60

1  
2  
3 minutes of hanging and Active time as time without hitches), proportion of CHVs effectively  
4 using the decision support system (Within the system, on a quarterly basis we will be able to  
5 generate reports on decisions, correct or otherwise, made by the CHVs. These will also be  
6 compared to the control site that will only have a paper based system of data collection), and the  
7 experiences of the CHVs and the mothers with the mobile based system. These will be compared  
8 to the investment.  
9  
10  
11  
12  
13  
14  
15  
16  
17  
18  
19

20 To answer the question on effect of the system on utilisation of services, the data above will be  
21 triangulated with data from the **mPAMANECH application which already has an integrated**  
22 **data collection module**, the data generated by the CHVs and participating health facilities will  
23 be retrieved, cleaned and analyzed to derive estimates of the main outcome of interest – correct  
24 referral practices. In addition, these data will be triangulated with other sources such as the CHV  
25 monthly reports and health facility HMIS. A system of random numbers generated using STATA  
26 will be used to select the respondents based on a sampling frame that is going to be informed by  
27 an updated household register in the selected community units.  
28  
29  
30  
31  
32  
33  
34  
35  
36  
37

#### 38 ➤ **Qualitative study**

39 We will use focus group discussions (FGDs) and in-depth interviews among the direct project  
40 beneficiaries and CHVs, and key informant interviews with key actors (sCHMTs, health  
41 providers, CHVs and community leaders). Participants will be purposively selected to represent  
42 the different stakeholders as well as different health service user categories (users and non-  
43 users).  
44  
45  
46  
47  
48  
49  
50  
51

52 Data from the quantitative survey will be used to identify women who have or not used specific  
53 MNH services and these will be approached to participate in the focus group discussions or in-  
54  
55  
56  
57  
58  
59  
60



1  
2  
3 depth interviews. Other respondents will be identified based on their position in the community  
4  
5 and their role in the project.  
6  
7  
8  
9

## 10 **Data Collection, Management and Analysis**

11  
12 Data collection:

13  
14 We will conduct a baseline survey and an end-line at least one year after the full implementation  
15  
16 of the intervention. The control group will be assessed at the same time as the surveys are being  
17  
18 conducted in the intervention group. To strengthen the case for causal inference we will also do  
19  
20 a systematic monitoring and documentation of the intervention based on our theory of change.  
21  
22 The monitoring and documentation will also capture any other contextual factors that may  
23  
24 influence the same outcomes as our intervention. The effects and impact of the project will be  
25  
26 determined by triangulating data and information from different sources, examining trends where  
27  
28 possible, and trying to find and support explanations for the observed findings.  
29  
30  
31  
32  
33

34 Our key data sources will be the following: household surveys, routine HMIS data and  
35  
36 qualitative assessments (interviews and focus group discussions).  
37

38 We will conduct simple and multiple logistic regression analyses comparing differences in the  
39  
40 proportions of women in reproductive age and children under-five at baseline and end line for  
41  
42 variables like antenatal coverage, vaccination coverage, skilled birth attendance, among others,  
43  
44 (See figure 1 for key indicators). These analyses will control for any differences in the samples  
45  
46 (if any) at the two time points as well as the contribution of contextual factors that may have  
47  
48 occurred in the course of the implementation.  
49  
50  
51  
52  
53  
54  
55  
56  
57  
58  
59  
60

1  
2  
3 mPAMANECH data: Descriptive data in terms of referrals by, diagnostic decisions, among  
4  
5 others, will be summarised using means and standard deviations for the parametric continuous  
6  
7 data and medians with inter-quartile ranges for the non-parametric data. Categorical data such as  
8  
9 referrals by age and gender will be summarised using proportions and percentages.  
10  
11

12 Qualitative data: Qualitative data will be transcribed and saved in Word format. Transcribed  
13  
14 word files will be imported into NVIVO software (QSR International Pty Ltd) for coding and  
15  
16 further analysis. Analysis across all transcripts will be conducted using a constant comparative  
17  
18 method to identify themes and their repetitions and variations. The analysis will also aim to  
19  
20 identify changes (if any) in various indicators that could be attributed to the intervention. Figure  
21  
22 5 shows the study's timeline.  
23  
24  
25

### 26 27 **3. Ethics and Dissemination**

28  
29 The study was reviewed internally by APHRC's internal scientific review committee. Ethical  
30  
31 approval for the project was obtained from the African Medical Research Fund's Ethical and  
32  
33 Scientific Review Committee (AMREF-ESRC P279/2016). The research team has undergone the  
34  
35 NIH training on protecting human research participants. We shall seek informed consent from all  
36  
37 study participants. All survey data will be collected in privacy and will be treated with  
38  
39 confidentiality. It will be made clear to participants from the onset that participation in the study  
40  
41 is voluntary and that they may choose to withdraw from the study at any time and for whatever  
42  
43 reasons without fear of penalty. The mPAMANECH datasets will be available to users (CHVs,  
44  
45 clinicians, CHEWs, among others) based on assigned, but limited, rights to protect the identity of  
46  
47 study participants. Only the core research team will have access to all of this information. The  
48  
49 entire dataset will be stored in the APHRC server.  
50  
51  
52  
53  
54  
55  
56  
57  
58  
59  
60

1  
2  
3 The potential risks for study participants are limited to (i) data breaches ii) time spent on the  
4 interview and (iii) discomfort experienced due to particular questions that respondents may  
5 perceive as upsetting or personal. These potential risks will be carefully explained to each  
6 participant during the process of obtaining informed consent.  
7  
8  
9  
10

11  
12 For the data collected on the phones and computers, once it is saved the data is relayed in real  
13 time to the APHRC server and no information is saved on the phone or the computer. The users  
14 will only be able to see summary data, without the participants' details. To further minimise the  
15 risk attached to data breaches following the loss of a smartphone, each phone will have a 4-digit  
16 pass code to enable the CHVs log into the phone. This code will become active after 3 minutes  
17 on non-use. The third level of security is the username and password on each device.  
18  
19  
20  
21  
22  
23  
24  
25  
26  
27  
28

### 29 **Plan for Communicating Findings of the Study:**

30  
31 Results obtained through this study will be made available to those who contributed information;  
32 the communities of Kamukunji and Embakasi. In addition,  
33  
34

- 35 i. The study team will conduct one major dissemination workshop in Kenya to share  
36 research findings with development partners, local NGOs, healthcare providers, activists,  
37 media houses, health professional societies, and policymakers.  
38
- 39 ii. Findings of the study will be shared at local and international conferences with  
40 researchers and policy makers.  
41  
42
- 43 iii. We also expect to publish 3 peer-reviewed articles in Open Access scientific journals.  
44  
45
- 46 iv. The Policy Engagement and Communications (PEC) unit at APHRC will also use the  
47 findings of this study to produce policy briefs, fact sheets, and working papers, as well as  
48 newsletters, which will be shared with a wide range of stakeholders.  
49  
50  
51  
52  
53  
54  
55  
56

- 1  
2  
3 v. The findings of the study will also be shared through APHRC's website.  
4  
5  
6  
7  
8  
9

#### 10 **4. Discussion**

11  
12  
13  
14 Maternal and neonatal health are both national and global priorities given that maternal and  
15 neonatal health indicators have not appreciably improved over the Millennium Development  
16 Goals life-span. They remain aspirations in the Sustainable Development agenda. CHVs are a  
17 critical component of the health workforce bridging the gap between communities and the formal  
18 health system. They not only improve coverage and access to basic health services but are also  
19 usually available in locations where and at times when formal health services are unavailable or  
20 inadequate. Quality healthcare is largely supported by quality data. Kenya still faces challenges  
21 with its Health Management Information System. Inaccurate data as a result of poor  
22 documentation impair the country's planning processes. This project accords APHRC and its  
23 partners an opportunity to utilize funds that have been identified to respond to Kenya's needs; to  
24 improve maternal and newborn health.  
25  
26  
27  
28  
29  
30  
31  
32  
33  
34  
35  
36  
37  
38  
39

40 The next steps of the project if the experiments under this grant are successful will include  
41 sharing the findings with the Nairobi City County and the funder and agreeing on the next phase  
42 of implementation. The Ministry of Health, Nairobi, is keen to roll out the system county-wide  
43 subject to availability of funding. The project team will work with the consortium to generate  
44 evidence to support decision-making at whatever stage of implementation. These may include  
45 effectiveness in reducing adverse maternal and neonatal outcomes at national level, cost-  
46 effectiveness, process issues such as CHV motivation and efficiency among others.  
47  
48  
49  
50  
51  
52  
53  
54  
55  
56  
57  
58  
59  
60

Potential impediments to the intervention include possible technology failure, loss of equipment (phones) and CHV turnover; all of which could require revisions and adaptations in the work plan (e.g., quality assurance, insurance, and training). A potential harmful unintended consequence stems from the fact that CHVs are not medically trained and as such could make a decision to treat at home, rather than refer (even when the system advises otherwise) with possible negative health consequences for the mothers and their newborns. However, since the system allows health workers to access this data, they will be in-charge of following up on such cases to avoid unnecessary delays and such unintended consequences.

## 5. Conclusion

The study outlined in this protocol will assess the added value of using a CHV decision-support module of mPAMANECH in reducing maternal complications and newborn deaths in the informal settlements of Nairobi, Kenya. The study's findings will contribute to the body of knowledge on the effectiveness of mHealth innovations in improving maternal, newborn and child health services and outcomes in urban informal settlements. Successful execution of the protocol will generate evidence on the effectiveness, if any, of the system. Based on the positive lessons learned, this project will provide a system for adoption by the local and central governments, for resource limited communities.

## 6. Competing interests statement:

None declared.

## 7. Authors' contributions:

PB, CK, EK, AKZ conceived the project and its design and participated in refining the manuscript. MO contributed to the refining of the design. PB drafted the manuscript. All authors read and approved the final manuscript.

## 8. Funding statement:

This project is supported by the County Innovation Challenge Fund for Kenya (GR: CICF-INN-R2-088).  
The funder had no role in the decision to write and publish this protocol.

## 9. References:

1. Say, L., et al., *Global causes of maternal death: a WHO systematic analysis*. The Lancet Global Health, 2014.
2. Liu, L., et al., *Global, regional, and national causes of child mortality: an updated systematic analysis for 2010 with time trends since 2000*. The Lancet, 2012. **379**(9832): p. 2151-2161.
3. WHO, *Neonatal and Perinatal Mortality: Country, Regional and Global Estimates*. 2006, World Health Organization: Geneva.
4. Jehan, I., Harris, H., Salat, S., Zeb, A., Mobeen, N., Pasha, O., McClure, M. E., Moore, J., Wright, L. L., & Goldenberg, R. L., *Neonatal mortality, risk factors and causes: a prospective population-based cohort study in urban Pakistan*. Bull World Health Organ, 2009. **87**(2): p. 130-138.
5. KNBS and ICF Macro, *Kenya Demographic and Health Survey 2008-09* 2010, Kenya National Bureau of Statistics (KNBS) and ICF Macro: Calverton, Maryland.
6. KNBS, *Kenya Demographic and Health Survey 2014*. 2015, Kenya National Bureau of Statistics (KNBS): Nairobi, Kenya.
7. Lehmann, U. and D. Sanders, *Community health workers: what do we know about them*. The state of the evidence on programmes, activities, costs and impact on health outcomes of using community health workers. Geneva: World Health Organization, 2007: p. 1-42.
8. Christopher, J.B., et al., *Thirty years after Alma-Ata: a systematic review of the impact of community health workers delivering curative interventions against malaria, pneumonia and diarrhoea on child mortality and morbidity in sub-Saharan Africa*. Hum Resour Health, 2011. **9**(1): p. 27.
9. Gilmore, B. and E. McAuliffe, *Effectiveness of community health workers delivering preventive interventions for maternal and child health in low-and middle-income countries: a systematic review*. BMC Public Health, 2013. **13**(1): p. 847.
10. Mumbo, H.M., et al., *Uptake of task shifting as a community strategy in Kenya*. European Scientific Journal, 2013. **9**(14).
11. Berner, E.S., *Clinical decision support systems*. 2007: Springer.
12. Kawamoto, K., et al., *Improving clinical practice using clinical decision support systems: a systematic review of trials to identify features critical to success*. Bmj, 2005. **330**(7494): p. 765.
13. Garg, A.X., et al., *Effects of computerized clinical decision support systems on practitioner performance and patient outcomes: a systematic review*. Jama, 2005. **293**(10): p. 1223-1238.
14. Bates, D.W., et al., *Ten commandments for effective clinical decision support: making the practice of evidence-based medicine a reality*. Journal of the American Medical Informatics Association, 2003. **10**(6): p. 523-530.
15. Agarwal, S., et al., *Guidelines for reporting of health interventions using mobile phones: mobile health (mHealth) evidence reporting and assessment (mERA) checklist*. bmj, 2016. **352**: p. i1174.
16. Blaya, J.A., H.S. Fraser, and B. Holt, *E-health technologies show promise in developing countries*. Health Affairs, 2010. **29**(2): p. 244-251.
17. Vodafone, *Connected Worker: How mobile technology can improve working life in emerging economies*  
[http://www.vodafone.com/content/dam/sustainability/pdfs/vodafone\\_connected\\_worker.pdf](http://www.vodafone.com/content/dam/sustainability/pdfs/vodafone_connected_worker.pdf), 2015.

- 1
  - 2
  - 3
  - 4
  - 5
  - 6
  - 7
  - 8
  - 9
  - 10
  - 11
  - 12
  - 13
  - 14
  - 15
  - 16
  - 17
  - 18
  - 19
  - 20
  - 21
  - 22
  - 23
  - 24
  - 25
  - 26
  - 27
  - 28
  - 29
  - 30
  - 31
  - 32
  - 33
  - 34
  - 35
  - 36
  - 37
  - 38
  - 39
  - 40
  - 41
  - 42
  - 43
  - 44
  - 45
  - 46
  - 47
  - 48
  - 49
  - 50
  - 51
  - 52
  - 53
  - 54
  - 55
  - 56
  - 57
  - 58
  - 59
  - 60
18. Lucas, H., *Information and communications technology for future health systems in developing countries*. Social Science & Medicine, 2008. **66**(10): p. 2122-2132.
19. Lund, S., et al., *Mobile phone intervention reduces perinatal mortality in zanzibar: secondary outcomes of a cluster randomized controlled trial*. JMIR mHealth and uHealth, 2014. **2**(1): p. e15.
20. Noordam, A.C., et al., *Improvement of maternal health services through the use of mobile phones*. Tropical Medicine & International Health, 2011. **16**(5): p. 622-626.
21. Free, C., et al., *The effectiveness of mobile-health technology-based health behaviour change or disease management interventions for health care consumers: a systematic review*. PLoS med, 2013. **10**(1): p. e1001362.
22. Braun, R., et al., *Community health workers and mobile technology: a systematic review of the literature*. PloS one, 2013. **8**(6): p. e65772.
23. Källander, K., et al., *Mobile health (mHealth) approaches and lessons for increased performance and retention of community health workers in low-and middle-income countries: a review*. Journal of medical Internet research, 2013. **15**(1): p. e17.
24. Bakibinga, P., et al., *The effect of enhanced public-private partnerships on Maternal, Newborn and child Health Services and outcomes in Nairobi-Kenya: the PAMANECH quasi-experimental research protocol*. BMJ open, 2014. **4**(10): p. e006608.
25. APHRC, *Harnessing Public-Private Partnership to improve Maternal, Newborn and Child Healthservices and outcomes in Nairobi slum settlement: End of Grant report*. 2016, African Population & Health Research Center (APHRC): Nairobi, Kenya.
26. Baqui, A.H., et al., *Effectiveness of home-based management of newborn infections by community health workers in rural Bangladesh*. The Pediatric infectious disease journal, 2009. **28**(4): p. 304.
27. Waiswa, P., et al., *Effect of the Uganda Newborn Study on care-seeking and care practices: a cluster-randomised controlled trial*. Glob Health Action, 2014. **7**: p. 24584.
28. MOH, *Community Health Volunteers (CHVs): Basic Modules Handbook*, ed. M.o.H. Division of Community Health Services, Kenya. 2013, Nairobi, Kenya.
29. RedCross-Kenya. *Training CHWs in Kenya – Lessons Learned*. 2014 [cited 2016 25/8/16].
30. WHO. *Mother and Child Card: Danger Signs*. 2012 [cited 2016 13/8/16].

Figure 1, Key Outcomes:

| Domain of Inquiry                                                                        | Key Outcome Indicators                                                                                                                                                                                                                                                                                                                                                                                                                                                                                                                                                                                                                                                                                                                                                                |
|------------------------------------------------------------------------------------------|---------------------------------------------------------------------------------------------------------------------------------------------------------------------------------------------------------------------------------------------------------------------------------------------------------------------------------------------------------------------------------------------------------------------------------------------------------------------------------------------------------------------------------------------------------------------------------------------------------------------------------------------------------------------------------------------------------------------------------------------------------------------------------------|
| Assess the feasibility and acceptability of using a decision-support module of mPAMANECH | <ul style="list-style-type: none"> <li>- Percentage time for which the system is down on a monthly basis</li> <li>- Number of CHVs effectively using the decision support tool</li> <li>- Proportion of CHVs able to identify at least 4 danger signs among neonates</li> <li>- Proportion of CHVs able to identify at least 1 danger sign among neonates</li> <li>- Proportion of CHVs able to identify at least 2 post-partum complications</li> <li>- Percentage of correct referral decisions by CHVs for post-partum mothers with complications</li> <li>- Percentage of correct referral decisions by CHVs for neonates with danger signs</li> <li>- Proportion of pregnant women referred for ANC by CHVs</li> <li>- Proportion of mothers referred for PNC by CHVs</li> </ul> |
| Determine the decision-support platform's effect on utilization of MNH services          | <ul style="list-style-type: none"> <li>- Proportion of women attending at least 4 ANCs</li> <li>- Proportion of all mothers attending at least 2 PNCs</li> <li>- Proportion of deliveries assisted by trained personnel</li> <li>- Percentage of women who accessed first ANC within the 1st trimester</li> <li>- Proportion of women referred for post-partum family planning</li> <li>- Proportion of newborns with at least one danger sign referred by CHVs</li> <li>- Proportion of low birth weight newborns referred</li> <li>- Proportion of women lost during follow up</li> <li>- Proportion of newborns lost during follow up</li> </ul>                                                                                                                                   |

Figure 1: Key Outcome measures

30x39mm (300 x 300 DPI)



Figure 2, Theory of Change

CHV DSS-Theory of Change

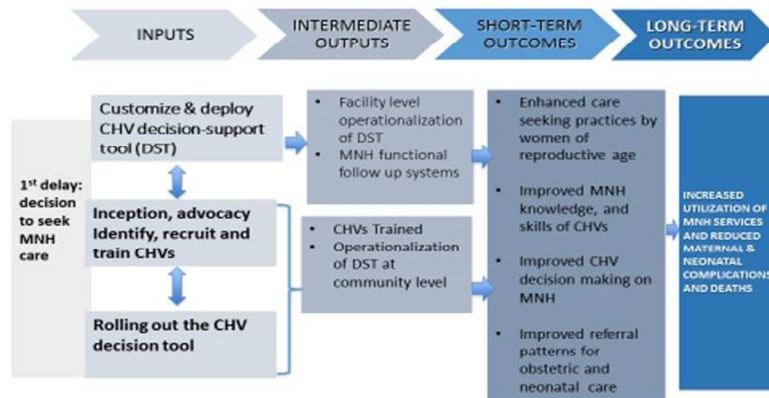

Figure 2: Theory of change

78x40mm (300 x 300 DPI)

review only

1  
2  
3  
4  
5  
6  
7  
8  
9  
10  
11  
12  
13  
14  
15  
16  
17  
18  
19  
20  
21  
22  
23  
24  
25  
26  
27  
28  
29  
30  
31  
32  
33  
34  
35  
36  
37  
38  
39  
40  
41  
42  
43  
44  
45  
46  
47  
48  
49  
50  
51  
52  
53  
54  
55  
56  
57  
58  
59  
60

Figure 3, Mobile Data Gathering Platform

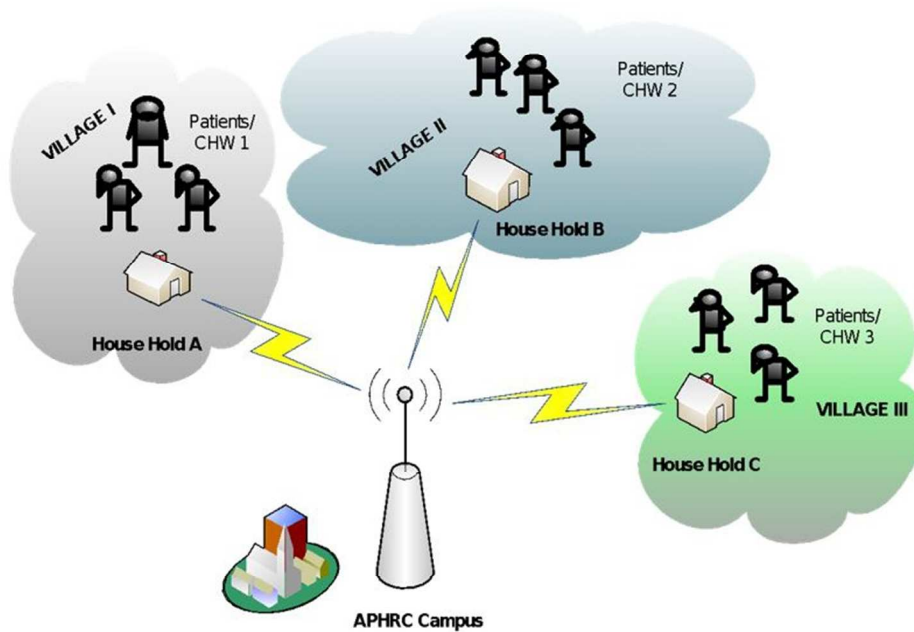

Figure 3: The system

72x53mm (300 x 300 DPI)

Review only

Figure 4: How the system works



Figure 4: How the system works

70x53mm (300 x 300 DPI)

ew only

1  
2  
3  
4  
5  
6  
7  
8  
9  
10  
11  
12  
13  
14  
15  
16  
17  
18  
19  
20  
21  
22  
23  
24  
25  
26  
27  
28  
29  
30  
31  
32  
33  
34  
35  
36  
37  
38  
39  
40  
41  
42  
43  
44  
45  
46  
47  
48  
49  
50  
51  
52  
53  
54  
55  
56  
57  
58  
59  
60

1  
2  
3  
4  
5  
6  
7  
8  
9  
10  
11  
12  
13  
14  
15  
16  
17  
18  
19  
20  
21  
22  
23  
24  
25  
26  
27  
28  
29  
30  
31  
32  
33  
34  
35  
36  
37  
38  
39  
40  
41  
42  
43  
44  
45  
46  
47  
48  
49  
50  
51  
52  
53  
54  
55  
56  
57  
58  
59  
60

Figure 5, Project timeline

| CHV Decision Support Application: Pilot study |      |    |    |      |    |    |    |
|-----------------------------------------------|------|----|----|------|----|----|----|
| Activities                                    | 2016 |    |    | 2017 |    |    |    |
|                                               | Q1   | Q2 | Q3 | Q4   | Q5 | Q6 | Q7 |
| Inception period                              | █    |    |    |      |    |    |    |
| Seek ethical approval                         |      | █  |    |      |    |    |    |
| Baseline                                      |      |    | █  |      |    |    |    |
| Recruit & train field team                    |      |    | █  |      |    |    | █  |
| Conduct Baseline                              |      |    | █  |      |    |    |    |
| Conduct Endline                               |      |    | █  |      |    |    | █  |
| Data cleaning                                 |      |    | █  |      |    |    | █  |
| Data analysis and interpretation              |      |    | █  |      |    |    | █  |
| Scientific write up on baseline               |      |    | █  |      |    |    | █  |
| Scientific write up on endline                |      |    | █  |      |    |    | █  |
| Develop Decision Support System               |      | █  |    |      |    |    |    |
| Training of CHWs                              |      |    |    |      |    |    |    |
| Training of DHMTs                             |      |    | █  |      |    |    |    |

Figure 5: Project timeline

54x48mm (300 x 300 DPI)

only

| Project Title                                                                                      | <b>Using a Decision-Support Smartphone application to enhance Community Health Volunteers' effectiveness in reducing Maternal complications and reducing Newborn Deaths in the informal settlements of Nairobi,</b> |                                                                                                                                                                                                                                                                                                                                                 |
|----------------------------------------------------------------------------------------------------|---------------------------------------------------------------------------------------------------------------------------------------------------------------------------------------------------------------------|-------------------------------------------------------------------------------------------------------------------------------------------------------------------------------------------------------------------------------------------------------------------------------------------------------------------------------------------------|
| <b>Objectively Verifiable Indicators</b>                                                           |                                                                                                                                                                                                                     |                                                                                                                                                                                                                                                                                                                                                 |
| Domain of inquiry                                                                                  | Indicators                                                                                                                                                                                                          | Method of calculation                                                                                                                                                                                                                                                                                                                           |
| <b>1. Assess the feasibility and acceptability of using a decision-support module of mPAMANECH</b> | Percentage time for which the system is down on a monthly basis                                                                                                                                                     | <b>(Numerator:</b> Number of times (in minutes) when the system is down<br><b>Denominator:</b> Total active time in a month. Down time defined as 30 minutes of hanging and Active time as time without hitches) * 100                                                                                                                          |
|                                                                                                    | Number of CHVs effectively using the decision support tool                                                                                                                                                          | <b>Numerator:</b> Number of CHVs able to either correctly refer or manage clients at home (target is 50 CHVs).<br><b>Within the system, on a quarterly basis we will be able to generate reports on decisions made by the CHVs. These will also be compared to the control site that will only have a paper based system of data collection</b> |
|                                                                                                    | Proportion of CHVs able to identify at least 4 danger signs among neonates                                                                                                                                          | <b>Numerator:</b> Number of CHVs able to identify at least 4 danger signs among neonates (aged upto 28 days). <b>Denominator:</b> Total number of CHVs in the selected CUs (total 50 CHVs).                                                                                                                                                     |
|                                                                                                    | Proportion of CHVs able to identify at least 2 post-partum complications                                                                                                                                            | <b>Numerator:</b> Number of CHVs able to identify at least 2 post-partum complications. <b>Denominator :</b> Total number of CHVs in selected Cus (total 50 CHVs)                                                                                                                                                                               |
|                                                                                                    | Percentage of correct referral decisions by CHVs for post-partum mothers with complications                                                                                                                         | <b>(Numerator:</b> Number of correct referrals by CHVs for post-partum mothers with complications. <b>Denominator:</b> Total number of postpartum women referred. ) * 100                                                                                                                                                                       |
|                                                                                                    | Percentage of correct referral decisions by CHVs for neonates (aged upto 28 days) with danger signs                                                                                                                 | <b>(Numerator:</b> number of correct referrals by CHVs for neonates (aged upto 28 days) with danger signs. <b>Denominator:</b> Total number of neonate referrals) * 100                                                                                                                                                                         |
|                                                                                                    | Proportion of pregnant women referred for ANC by CHVs                                                                                                                                                               | <b>Numerator:</b> Number of pregnant women referred for ANC to selected health facilities by CHVs <b>Denominator:</b> Total number of women-pregnant seen by CHVs                                                                                                                                                                               |
|                                                                                                    | Proportion of mothers referred for PNC by CHVs                                                                                                                                                                      | <b>Numerator:</b> Number of post-delivery women referred for PNC to selected health facilities by CHVs. <b>Denominator:</b> Total number of deliveries in selected facilities and at home                                                                                                                                                       |
|                                                                                                    | Proportion of women attending at least 4 ANC                                                                                                                                                                        | <b>Numerator:</b> Number of pregnant women attending 4 or more ANC visits in project sites. <b>Denominator:</b> Total number of pregnant women seeking ANC services in the selected health facilities                                                                                                                                           |
|                                                                                                    | Proportion of all mothers attending at least 2 PNCs                                                                                                                                                                 | <b>Numerator:</b> Number of mothers attending at least 2 PNCs in project sites. <b>Denominator:</b> Total number of postpartum women seeking PNC services in the selected health facilities.                                                                                                                                                    |
|                                                                                                    | Proportion of deliveries assisted by trained personnel                                                                                                                                                              | <b>Numerator:</b> Number of assisted deliveries by trained personnel (at home or at the facility). <b>Denominator:</b> Total number of deliveries in the facilities and CUs covered by project                                                                                                                                                  |
|                                                                                                    | Percentage of women who accessed first ANC within the 1st trimester                                                                                                                                                 | <b>(Numerator:</b> Number of women attending the first ANC within the first semester. <b>Denominator:</b> Total number of women attending ANC in project sites) * 100                                                                                                                                                                           |
|                                                                                                    | Proportion of women referred by CHVs for post-partum family planning                                                                                                                                                | <b>Numerator:</b> Number of post-partum women referred and seen at facilities for family planning. <b>Denominator:</b> Total number of women referred in the facilities and Cus in project sites                                                                                                                                                |
|                                                                                                    | Proportion of newborns (aged upto 28 days) with atleast one danger sign referred by CHV                                                                                                                             | <b>Numerator:</b> Number of CHVs able to identify at least 4 danger signs among neonates (aged upto 28 days). <b>Denominator:</b> Total number of CHVs in the selected CUs (total 50 CHVs).                                                                                                                                                     |
|                                                                                                    | Proportion of low birth weight newborns (<2500g) referred to selected health facilities.                                                                                                                            | <b>Numerator:</b> Number of low birth weight newborns (< 2500g) referred to selected health facilities. <b>Denominator:</b> Total number of live birth weighted in selected facilities                                                                                                                                                          |
|                                                                                                    | Proportion of women lost during follow up                                                                                                                                                                           | <b>Numerator:</b> Number of women referred by CHVs who fail to report to the selected facilities. <b>Denominator:</b> Total number of women referred by CHV                                                                                                                                                                                     |
|                                                                                                    | Proportion of newborns (aged upto 28 days) who failed to report to selected health facilities                                                                                                                       | <b>Numerator:</b> Number of newborns (aged upto 28days) who failed to report to selected health facilities (aged upto 28 days) referred by CHVs                                                                                                                                                                                                 |

1  
2  
3 **Using a Decision-Support Smartphone application to enhance Community Health**  
4 **Volunteers' effectiveness in reducing maternal complications and reducing newborn**  
5 **Deaths in the informal settlements of Nairobi, Kenya**  
6  
7

8 **Thematic Interview Guide with suggestions to questions**  
9

10 **FGD CHVs**  
11

12 **INTRODUCTION AND WARM UP (2 mins)**  
13

- 14 ● The moderator introduces him/herself and explains the purpose of the study
- 15 ● The moderator explains that the discussion is open, not an exam and there is no  
16 wrong or right answer. Explain that the information given by each participant is confidential.
- 17 ● Encourage the respondent to give honest opinions.
- 18 ● Talk not just for yourself but also what you know your friends think.
- 19 ● Explain the use of the recorder.  
20  
21

22  
23 **A. Experience working in the community**  
24

25 **Probes**

- 26 a) How many households are you allocated and how often do you visit them?
- 27 b) What are some of the activities conducted in the household? (Counselling,  
28 Referral)
- 29 c) How do you collect/report information collected from households?
- 30 d) How do you handle maternal, neonates and children complications, deliveries?
- 31 e) Do you have a way of identifying any danger signs in newborns and mothers and  
32 how easy it?
- 33 f) At what point do you refer complicated cases?
- 34 g) What do you think should be improved?  
35  
36  
37

38 **B. Health facilities in the area**  
39

40 **Probes**  
41

- 42 a) Which health facilities do you refer your patients?
- 43 b) How do you follow up patients referred to ensure they go to the health facilities?
- 44 c) Do you get feedback on referrals done?
- 45 d) Are the services offered in the facilities affordable and responsive to the needs of  
46 the community?
- 47 e) In your opinion are the patients satisfied with the services?
- 48 f) Perceived quality, accessibility and affordability regarding the existing FP and  
49 maternal health services, effectiveness of referral system, and barriers to  
50 utilization of the health services.
- 51 g) Challenges and Opportunities (how to assist mothers and children to access care),  
52 improve their work lives (reporting, knowledge and skills)  
53  
54  
55  
56  
57  
58  
59  
60

1  
2  
3  
4  
5  
6  
7  
8 C. Data collection/reporting and follow-up tools  
9

10 **Probes**

- 11  
12 a) Generally how do you feel about the data collection/reporting system  
13 currently in use  
14  
15 b) On average how much time does it take to collect data from one household  
16  
17 c) How often is your work reviewed and by who?  
18  
19 d) What are the advantages and disadvantages/challenges of the current system?  
20  
21 e) How in your opinion do you think it can be improved?  
22  
23 a) If you have heard of any health related mobile applications used in this  
24 community, what is your opinion?  
25  
26 b) What are your views on the use of a decision support tool for CHVs to  
27 collect/report information & make referrals/ follow-ups?  
28  
29  
30  
31  
32  
33  
34  
35  
36  
37  
38  
39  
40  
41  
42  
43  
44  
45  
46  
47  
48  
49  
50  
51  
52  
53  
54  
55  
56  
57  
58  
59  
60

## IDI Postnatal women's interview guide

- a. Tell me about your childbirth experience?
- b. Have you heard of the term “dignity”? What do you understand by the term dignity? How would you describe dignity?
- c. While at home, did you have any thoughts about how your dignity will be affected in the labour ward?
  - If so, what these thoughts were and where they came from?
- d. Did you feel that the labourward would affect your dignity?
  - a. If so, how?
- e. Do you feel that the attending midwives affected your dignity during the childbirth process?
  - If so, how?
- f. During childbirth, were there any moments that you feel that you lost, or could have lost, your dignity?
  - If yes, explore the following;
    - What was the situation?
    - Was the situation related to your condition, treatment or care?
    - What were your feelings at the time?
    - Did you feel that the midwives tried to do anything to keep your dignity?
    - Did the labourward staff make the situation better or worse? If so, how?
    - Is there anything else you would have liked the attending staff to do in this situation?
- g. Is there anything else you would like to say about your dignity as a patient on the labourward?



## FGD: Women of Reproductive Age

### INTRODUCTION AND WARM UP (2 mins)

- The moderator introduces him/herself and explains the purpose of the study
- The moderator explains that the discussion is open, not an exam and there is no wrong or right answer. Explain that the information given by each participant is confidential.
- Encourage the respondent to give honest opinions.
- Talk not just for yourself but also what you know your friends think.
- Explain the use of the recorder.

A. Now I would like us to talk about your views on CHVs work in this community.

#### Probes

- a) Are you aware of any CHVs in this community and are you conversant with their roles?
  - b) Have you ever been visited by the CHV & for what reasons
  - c) Have you sought any services from the CHVs and what services
  - d) Do you generally find the services of the CHVs useful?
- B. I would like to talk about the reporting/data collecting mechanism used by the CHVs;

#### Probes

- a) What kind of information do the CHVs collect from you? How is it done?
  - b) How do you think it can be improved?
- C. Now I would like to ask about the Health facilities visited by you or any mother in the community;

#### Probes

- a) Which facilities do you visit frequently and what services do you most seek.
- b) Are you able to get quality care from these health facilities
- c) Do you get referred by the CHVs to these facilities
- d) Overall, what are your views on the referral system by CHVs and services offered by the health facilities in the community, please tell me more
- e) How do you think it can be improved?
- f) Perceived quality, accessibility and affordability regarding the existing FP and maternal health services, effectiveness of referral system, and barriers to utilization of the health services.
- g) Challenges and Opportunities (how to assist mothers and children to access care)

## KII: CHEWs and Health Providers

Tell me about your roles as a CHEW/Clinician in provision of health services to people in this community

### Probes

- a) Health status of the community
  - b) Interaction with the CHVs
  - c) Experiences working with the CHVs
- A. Now I would like to ask about the services offered by health facilities in this area
- a) Which facilities do residents of this community visit frequently and what services do they mostly seek.
  - b) Are they able to get quality care from these health facilities
  - c) Are they referred by the CHVs to these facilities
  - d) Overall, what are your views on the referral system by CHVs and services offered by the health facilities in the community, please tell me more
  - e) How do you think it can be improved?
- B. Now I going to talk about the reporting tools used to collect information/report and refer by the CHVs
- a) What tools are used to collect data in this community? Generally how do you feel about the data collection/reporting system currently in use?
  - b) On average how much time does it take the CHVs to collect data from one household
  - c) How often do you review CHVs' work?
  - d) What are the advantages and disadvantages/challenges of the current system?
  - e) How in your opinion do you think it can be improved?
  - f) In your opinion what would you say about mobile app in data collection and reporting process?

1  
2  
3  
4  
5  
6  
7  
8  
9  
10  
11  
12  
13  
14  
15  
16  
17 **KII Health Providers**

- 18  
19 A. Tell me about your roles as a Clinician in provision of health services to people in this  
20 community  
21

22 **Probes**

- 23  
24 a) Health status of the community  
25 b) Interaction with the CHVs  
26 c) Interaction with DHMTs  
27

- 28  
29 B. Now I would like to ask about the services offered by health facilities in this area  
30

31 **Probes**

- 32  
33 a. What services do they utilize mostly?  
34 b. Are they able to get quality care from these health facilities  
35 c. Are they referred by the CHVs to these facilities  
36 d. Overall, what are your views on the referral system by CHVs and health facilities? please  
37 tell me more  
38 e. How do you think it can be improved?  
39

- 40  
41 C. Reporting tools used to collect information/report and refer by the CHVs

- 42 a. What tools are used to collect data in this community? Generally how do you feel about  
43 the data collection/reporting system currently in use?  
44 b. What are the advantages and disadvantages/challenges of the current system?  
45 c. How in your opinion do you think it can be improved?  
46 d. In your opinion what would you say about mobile app in data collection and reporting  
47 process?  
48  
49  
50

- 51  
52 D. What do you understand by the term “dignity”?  
53  
54

55 Threats to dignity:  
56  
57  
58  
59  
60

1  
2  
3  
4  
5  
6  
7  
8  
9  
10  
11  
12  
13  
14  
15  
16  
17  
18  
19  
20  
21  
22  
23  
24  
25  
26  
27  
28  
29  
30  
31  
32  
33  
34  
35  
36  
37  
38  
39  
40  
41  
42  
43  
44  
45  
46  
47  
48  
49  
50  
51  
52  
53  
54  
55  
56  
57  
58  
59  
60

E. Have you ever felt that a woman's dignity was lost, or threatened at any point during the childbirthing period?

- If so, what do you feel caused this to happen?
- What effect do you feel you had on the situation? Do you feel that you improved or worsened the situation, and how?
- How do you feel other staff improved or worsened the situation, and how?
- Do you feel that you or any other staff could have done anything else to promote the woman's dignity in this situation, and if so, what could you have done?

Promotion of dignity:

F. Do you feel that women keep their dignity during their care/treatment/childbirth?

- What do you feel helped promote the women's dignity?
- What was your role in promoting the women's dignity?

Effect of the ward environment:

G. Do you feel that the ward environment affects women's dignity?

- Is there is anything more that could be done to the ward environment to promote a woman's dignity?
- Is there anything else you would like to say about women's dignity on the labourward?

1  
2  
3  
4  
5  
6  
7  
8  
9  
10  
11  
12  
13  
14  
15  
16  
17  
18  
19  
20  
21  
22  
23  
24  
25  
26  
27  
28  
29  
30  
31  
32  
33  
34  
35  
36  
37  
38  
39  
40  
41  
42  
43  
44  
45  
46  
47  
48  
49  
50  
51  
52  
53  
54  
55  
56  
57  
58  
59  
60

**KII: Sub County focal person**

A) Tell me about your roles as a sub-county focal person in this community

B) What can you say about the services offered by the health facilities in this community?

**Probes:**

- a) The cost, quality of care, available to mothers and children
- b) Do you know of any challenges that are faced by the mothers and children in this community to access health facilities?
- c) In your opinion do you think that the engagement of the CHVs in the community is of help, what are your views on the services offered by the CHVs  
Probes; task shifting, improved care?

C) Please tell more on your experiences working with the SCMOH,

**Probe:**

- Perceived quality, accessibility and affordability regarding the existing FP and maternal health services, effectiveness of referral system, and barriers to utilization of the health services.
- Challenges and Opportunities (how to assist mothers and children to access care), reporting, compliance with regulations by health facilities and CHVs

D) Are there any activities that you have been involved in this sub-County, please clarify;

**Probes;** Running of meetings, Trainings, support supervisions and any community engagements (specify)

E) In your opinion what would you say about mobile app in data collection and reporting process? Please tell me more

1  
2  
3  
4  
5  
6  
7  
8  
9  
10  
11  
12  
13  
14  
15  
16  
17  
18  
19  
20  
21  
22  
23  
24  
25  
26  
27  
28  
29  
30  
31  
32  
33  
34  
35  
36  
37  
38  
39  
40  
41  
42  
43  
44  
45  
46  
47  
48  
49  
50  
51  
52  
53  
54  
55  
56  
57  
58  
59  
60

**KII: SCMOH**

A) Tell me about your work in this community

Probes: support supervision, sub county meetings & stakeholder forums

B) Tell me more about your engagement with the CHVs and how the experience has been

C) Experience working with health facilities

Probes: reporting, compliance with regulations

D) How effective are the CHVs in the community?

**Probes;**

- Perceived quality, accessibility and affordability regarding the existing FP and maternal health services, effectiveness of referral system, and barriers to utilization of the health services.
- Challenges and Opportunities (how to assist mothers and children to access care), reporting, compliance with regulations by health facilities and CHVs

E) In your opinion do you think a CHV decision support tool would be make CHV perform duties and responsibilities effectively? How is that?

1  
2  
3  
4  
5  
6  
7  
8  
9  
10  
11  
12  
13  
14  
15  
16  
17  
18  
19  
20  
21  
22  
23  
24  
25  
26  
27  
28  
29  
30  
31  
32  
33  
34  
35  
36  
37  
38  
39  
40  
41  
42  
43  
44  
45  
46  
47  
48  
49  
50  
51  
52  
53  
54  
55  
56  
57  
58  
59  
60

**AFRICAN POPULATION AND HEALTH RESEARCH CENTER**  
**HEALTH CHALLENGES AND SYSTEMS PROGRAM**  
**Using a Decision-Support Smartphone application to enhance Community Health Volunteers' efforts in**  
**reducing Maternal complications and reducing Newborn Deaths in the informal settlements**  
*Questionnaire for community health volunteers*

START TIME (24hrs Format) \_\_\_\_\_

DATE OF INTERVIEW (DD/MM/YYYY)

FIs CODE

NAME OF CHV \_\_\_\_\_

COMMUNITY HEALTH UNIT CHV IS LINKED TO \_\_\_\_\_

HEALTH FACILITY CHV IS LINKED TO \_\_\_\_\_

**1 BACKGROUND**

**1.1** RESPONDENT'S DATE OF BIRTH (DD/MM/YYYY)

**1.2** RESPONDENT'S AGE (COMPLETED YEARS) \_\_\_\_\_

**1.3** Have you ever attended school? YES.....  
NO.....

**1.4** What is the highest level of education that you have completed? Primary school .....  
Secondary .....  
College/university degree .....

**1.5** What grade/class did you attain?

**2.0 COMMUNITY SERVICES**  
**I would like us to discuss about the community services you are involved in. For**  
**some questions might require you to refer to your registers.**

**2.1** How many years have you served this community as a community health volunteer (CHV)? Less than 1 year.....  
1 - 2 years.....  
2 - 4 years.....  
More than 5 years.....

1  
2  
3  
4  
5  
6  
7  
8  
9  
10  
11  
12  
13  
14  
15  
16  
17  
18  
19  
20  
21  
22  
23  
24  
25  
26  
27  
28  
29  
30  
31  
32  
33  
34  
35  
36  
37  
38  
39  
40  
41  
42  
43  
44  
45  
46  
47  
48  
49  
50  
51  
52  
53  
54  
55  
56  
57  
58  
59  
60

|            |                                                                                                                                                                                                      |                                                                                                                                                                                                                                                                                                                                                                                                                                                                                                                                                                                                                                                                                                                                                                                                   |  |  |  |
|------------|------------------------------------------------------------------------------------------------------------------------------------------------------------------------------------------------------|---------------------------------------------------------------------------------------------------------------------------------------------------------------------------------------------------------------------------------------------------------------------------------------------------------------------------------------------------------------------------------------------------------------------------------------------------------------------------------------------------------------------------------------------------------------------------------------------------------------------------------------------------------------------------------------------------------------------------------------------------------------------------------------------------|--|--|--|
| <p>2.2</p> | <p>As a CHV, what are your roles?</p> <p><i>FW instructions:</i><br/> <i>Circle All that apply</i><br/> <i>Do not Prompt or read the options</i></p>                                                 | <p>HH Health education<br/>                 Proper nutrition durin<br/>                 Breast feeding.....<br/>                 Birth plan.....<br/>                 Health facility based c<br/>                 ANC.....<br/>                 PNC for mother .....<br/>                 Vaccination.....<br/>                 Danger signs in pregn<br/>                 Danger signs in postn<br/>                 Danger signs in newb<br/> <br/>                 Height measurments..<br/>                 Weight measurements<br/>                 Referrals.....<br/>                 Growth monitoring of<br/>                 Distribution of FP cor<br/>                 Community mobilizat<br/>                 Identification of wom<br/>                 Others (Specify).....</p> |  |  |  |
| <p>2.3</p> | <p>How many households are allocated /assigned to you?</p>                                                                                                                                           | <table border="1" style="width: 100px; height: 20px; margin: auto;"> <tr> <td style="width: 33%;"></td> <td style="width: 33%;"></td> <td style="width: 33%;"></td> </tr> </table>                                                                                                                                                                                                                                                                                                                                                                                                                                                                                                                                                                                                                |  |  |  |
|            |                                                                                                                                                                                                      |                                                                                                                                                                                                                                                                                                                                                                                                                                                                                                                                                                                                                                                                                                                                                                                                   |  |  |  |
| <p>2.4</p> | <p>In the allocated households in Qn 2.3, how many have?</p> <p><i>FW Instruction:</i><br/> <i>Ask about counts in each category</i></p>                                                             | <p>Non pregnant wome<br/>                 Pregnant women<br/>                 How many of the pr<br/>                 categorized as havin<br/>                 Newborns (0-28 day<br/>                 Infants (29 days to 1<br/>                 Children (12 month:</p>                                                                                                                                                                                                                                                                                                                                                                                                                                                                                                                        |  |  |  |
|            | <p>Would you categorize pregnant women with the following conditions as having high risk pregnancies.</p> <p><i>FW Instructions: Read out the options.</i><br/> <i>Multiple response allowed</i></p> | <p>Carrying twins and l<br/>                 multiples<br/>                 Gestestional diabete<br/>                 HIV positive wome<br/>                 High blood pressure<br/>                 Pregnancy in teens &lt;<br/>                 Pregnancy in wome<br/>                 Overweights/ obese<br/>                 History of miscarria</p>                                                                                                                                                                                                                                                                                                                                                                                                                                        |  |  |  |
|            | <p style="text-align: center;"><i>NOW, I would like us to discuss about services that you have offered in the l</i><br/> <i>Some questions may require you refer to your records/registers</i></p>   |                                                                                                                                                                                                                                                                                                                                                                                                                                                                                                                                                                                                                                                                                                                                                                                                   |  |  |  |



|                                                                                                               | <b>Reference month</b>                                                                                                                                    |                                                                                                                                                                                                                                                                                                                     |
|---------------------------------------------------------------------------------------------------------------|-----------------------------------------------------------------------------------------------------------------------------------------------------------|---------------------------------------------------------------------------------------------------------------------------------------------------------------------------------------------------------------------------------------------------------------------------------------------------------------------|
| 2.5                                                                                                           | How many of the following have you visited in the last one month                                                                                          | Non pregnant wome<br>Pregnant women<br>Newborns (0-28 day<br>Infants (29 days to 1<br>Children (12 months                                                                                                                                                                                                           |
| 2.6                                                                                                           | In the last month, how many women have you referred to the nearest health facility for the following services                                             | Family planning<br>Pregnancy tests<br>ANC<br>Pregnancy danger si<br>Facility based devliv<br>PNC for mothers<br>Postpartum women                                                                                                                                                                                    |
| <b>FW : REFER TO QUESTION 2.6 , If women were referred for ANC , danger signs : if not, skip to section 3</b> |                                                                                                                                                           |                                                                                                                                                                                                                                                                                                                     |
| 2.7                                                                                                           | Among the women referred for ANC in the last one month, how many were for                                                                                 | 1st ANC visits<br>At least 4th ANC vi                                                                                                                                                                                                                                                                               |
|                                                                                                               |                                                                                                                                                           |                                                                                                                                                                                                                                                                                                                     |
| 2.8                                                                                                           | Kindly identify danger signs in pregnant women<br><br><i>FW instructions:</i><br><i>Circle All that apply</i><br><i>Do not Prompt or read the options</i> | High fever<br>Vaginal bleeding<br>Baby not moving<br>Weight loss<br>Swelling in hands or f<br>Bad headache<br>High blood Pressure<br>Blurred vision<br>Severe abdominal pai<br>Difficulty breathing<br>Painful urination<br>Convulsions/fits<br>Loss of consciousness<br>Heavy vaginal dischar<br>A lot of vomiting |

1  
2  
3  
4  
5  
6  
7  
8  
9  
10  
11  
12  
13  
14  
15  
16  
17  
18  
19  
20  
21  
22  
23  
24  
25  
26  
27  
28  
29  
30  
31  
32  
33  
34  
35  
36  
37  
38  
39  
40  
41  
42  
43  
44  
45  
46  
47  
48  
49  
50  
51  
52  
53  
54  
55  
56  
57  
58  
59  
60

|             |                                                                                                                                                             |                                                                                                                                                                                                                                                                                                                                                                     |
|-------------|-------------------------------------------------------------------------------------------------------------------------------------------------------------|---------------------------------------------------------------------------------------------------------------------------------------------------------------------------------------------------------------------------------------------------------------------------------------------------------------------------------------------------------------------|
|             |                                                                                                                                                             | Very pale palms of hands or nail bed<br>Genital ulcers<br>Other, specify _____                                                                                                                                                                                                                                                                                      |
| <b>2.9</b>  | Kindly identify danger signs in postpartum women<br><br><i>FW instructions:</i><br><i>Circle All that apply</i><br><i>Do not Prompt or read the options</i> | Fever without chills<br>Fever with chills<br>Heavy bleeding after 1<br>Bad abdominal pain<br>High blood pressure<br>Convulsions<br>Abnormal discharge<br>Loss of conciousness<br>Headaches, dizziness/<br>Blurry vision<br>Difficulty breathing<br>Difficulty paiing urine<br>Palm og hands and feet<br>than normal<br>Other (Specify)_____                         |
| <b>1.2</b>  | In the last 3 months, how many pregnant and postpartum women have you refered with danger signs?                                                            | Pregnant women<br>Post-partum comen                                                                                                                                                                                                                                                                                                                                 |
| <b>2.11</b> | Kindly identify danger signs in newborns<br><br><b>CIRCLE ALL MENTIONED</b>                                                                                 | Preterm birth<br>Preterm lowbirth we<br>Term lowbirth weig<br>Jaundice<br>Skin in palm and so<br>of feet turn blue<br>Yellow sole<br>Breathing difficultie<br>Fever ( temperature<br>Low temperature ( 3<br>Lethargy<br>Failure to feed<br>Convulsions or fits s<br>Drowsy<br>Fast breathing ( 60 t<br>more in 1 minute co<br>Chest indrawing<br>Movement only on s |

|      |                                                                                                                     |                                                                                                                                                                          |
|------|---------------------------------------------------------------------------------------------------------------------|--------------------------------------------------------------------------------------------------------------------------------------------------------------------------|
|      |                                                                                                                     | <p>or no movement ev<br/>on stimulation<br/>Signs of local infect<br/>umbilicus red or dr<br/>skin boils and eyes c<br/>Excessive weight lo<br/>Other (Specify)_____</p> |
| 2.10 | In the last 3 months, how many newborns have you referred to the nearest health facility for the following services | <p>Routine medical che<br/>Vaccinations<br/>Seek medical care fo</p>                                                                                                     |
| 3.0  | <p><b>DATA DOCUMENTATION</b><br/>Now I would like us to discuss about how you currently collect data</p>            |                                                                                                                                                                          |
| 3.1  | How do you collect data during home visits                                                                          | <p>Manually using MO<br/>Electronically using<br/>or electronic devices<br/>Others specify</p>                                                                           |
| 3.2  | How do you determine if a woman/newborn has a danger sign and needs urgent medical attention ?                      | <p>By referring to coun<br/>From memory<br/>I call someone to rel<br/>I guess<br/>I don't know<br/>Other specify _____</p>                                               |
| 3.3  | Are you satisfied with the current method of data collection ?                                                      | <p>Yes .....<br/>No.....<br/>D/K.....</p>                                                                                                                                |
| 3.4  | Do you think the current method of identifying danger signs in women and newborns is effective and efficient        | <p style="text-align: right;"><b>Y</b></p> <p>Effective           1<br/>Efficient           1</p>                                                                        |
| 3.5  | In your opinion, do you think an electronic / mobile data capture system will                                       | <p>Make work easier</p>                                                                                                                                                  |

1  
2  
3  
4  
5  
6  
7  
8  
9  
10  
11  
12  
13  
14  
15  
16  
17  
18  
19  
20  
21  
22  
23  
24  
25  
26  
27  
28  
29  
30  
31  
32  
33  
34  
35  
36  
37  
38  
39  
40  
41  
42  
43  
44  
45  
46  
47  
48  
49  
50  
51  
52  
53  
54  
55  
56  
57  
58  
59  
60

|                                                                                                                                   |                                                                                       |                                                                                                                                                                                       |
|-----------------------------------------------------------------------------------------------------------------------------------|---------------------------------------------------------------------------------------|---------------------------------------------------------------------------------------------------------------------------------------------------------------------------------------|
|                                                                                                                                   | <p><i>Fill with the correct response</i></p> <p>1=Yes<br/>2=No<br/>98=Do not know</p> | <p>Shorten time in HHs<br/>Assist in correct identification of danger signs<br/>Increase timely referral<br/>Reduce misdiagnosis at community level<br/><br/>Others specify _____</p> |
| <p><b>3.6</b></p>                                                                                                                 | <p>Have you been trained on mobile /electronic data collection</p>                    | <p>Yes.....<br/>No.....</p>                                                                                                                                                           |
| <p><b>FW INSTRUCTION : THANK THE PARTICIPANT FOR PARTICIPATION AND RECORD ANY GENERAL COMMENTS ABOUT THE INTERVIEW/REVIEW</b></p> |                                                                                       |                                                                                                                                                                                       |
| <hr/>                                                                                                                             |                                                                                       |                                                                                                                                                                                       |
| <hr/>                                                                                                                             |                                                                                       |                                                                                                                                                                                       |
| <hr/>                                                                                                                             |                                                                                       |                                                                                                                                                                                       |
| <p><b>END TIME (24 Hrs Format)</b></p>                                                                                            |                                                                                       |                                                                                                                                                                                       |
| <hr/>                                                                                                                             |                                                                                       |                                                                                                                                                                                       |



1  
2  
3  
4  
5  
6  
7  
8  
9  
10  
11  
12  
13  
14  
15  
16  
17  
18  
19  
20  
21  
22  
23  
24  
25  
26  
27  
28  
29  
30  
31  
32  
33  
34  
35  
36  
37  
38  
39  
40  
41  
42  
43  
44  
45  
46  
47  
48  
49  
50  
51  
52  
53  
54  
55  
56  
57  
58  
59  
60

|                               |          |          |            |
|-------------------------------|----------|----------|------------|
| on                            |          |          |            |
| g pregnancy.....              | A        |          |            |
| .....                         | B        |          |            |
| .....                         | C        |          |            |
| elivery.....                  | D        |          |            |
| .....                         | E        |          |            |
| .....                         | F        |          |            |
| .....                         | G        |          |            |
| ancy.....                     | H        |          |            |
| atal period.....              | I        |          |            |
| orns.....                     | J        |          |            |
| .....                         | K        |          |            |
| .....                         | L        |          |            |
| .....                         | M        |          |            |
| children.....                 | N        |          |            |
| nmodities.....                | O        |          |            |
| ion.....                      | P        |          |            |
| en with high risk pregnancies | Q        |          |            |
| .....                         | 96       |          |            |
| <hr/>                         |          |          |            |
| <hr/>                         |          |          |            |
| en (15 to 49 years)           |          |          |            |
| pregnant women can be         |          |          |            |
| g high risk pregnancies       |          |          |            |
| (s)                           |          |          |            |
| (1 months)                    |          |          |            |
| s to 5 years)                 |          |          |            |
| <hr/>                         |          |          |            |
|                               | <b>Y</b> | <b>N</b> | <b>D/K</b> |
| higher-order                  | <b>1</b> | <b>2</b> | <b>98</b>  |
| s                             | <b>1</b> | <b>2</b> | <b>98</b>  |
| n                             | <b>1</b> | <b>2</b> | <b>98</b>  |
| ;                             | <b>1</b> | <b>2</b> | <b>98</b>  |
| 17 years                      | <b>1</b> | <b>2</b> | <b>98</b>  |
| n > 35 years                  | <b>1</b> | <b>2</b> | <b>98</b>  |
| women                         | <b>1</b> | <b>2</b> | <b>98</b>  |
| ge(s)                         | <b>1</b> | <b>2</b> | <b>98</b>  |
| <hr/>                         |          |          |            |
| <i>ast one month.</i>         |          |          |            |

1  
2  
3  
4  
5  
6  
7  
8  
9  
10  
11  
12  
13  
14  
15  
16  
17  
18  
19  
20  
21  
22  
23  
24  
25  
26  
27  
28  
29  
30  
31  
32  
33  
34  
35  
36  
37  
38  
39  
40  
41  
42  
43  
44  
45  
46  
47  
48  
49  
50  
51  
52  
53  
54  
55  
56  
57  
58  
59  
60

\_\_\_\_\_

\_\_\_\_\_

---

en (15 to 49 years) 

|  |
|--|
|  |
|  |
|  |
|  |
|  |

ns)

1 months)

s to 5 years)

---

|  |  |
|--|--|
|  |  |
|  |  |
|  |  |
|  |  |
|  |  |
|  |  |

gns

ver

with danger signs

---

**ask the following question**

sits 

|  |  |
|--|--|
|  |  |
|  |  |

---

|      | Y | N | D/K |
|------|---|---|-----|
|      | 1 | 2 | 98  |
|      | 1 | 2 | 98  |
|      | 1 | 2 | 98  |
|      | 1 | 2 | 98  |
| feet | 1 | 2 | 98  |
|      | 1 | 2 | 98  |
|      | 1 | 2 | 98  |
|      | 1 | 2 | 98  |
| nd   | 1 | 2 | 98  |
|      | 1 | 2 | 98  |
|      | 1 | 2 | 98  |
| s    | 1 | 2 | 98  |
| ge   | 1 | 2 | 98  |
|      | 1 | 2 | 98  |

|    |                |   |   |     |
|----|----------------|---|---|-----|
| 1  |                |   |   |     |
| 2  |                |   |   |     |
| 3  |                |   |   |     |
| 4  |                |   |   |     |
| 5  |                |   |   |     |
| 6  |                |   |   |     |
| 7  |                | 1 | 2 | 98  |
| 8  |                | 1 | 2 | 98  |
| 9  | _____          |   |   | 96  |
| 10 |                |   |   |     |
| 11 |                |   |   |     |
| 12 |                | Y | N | D/K |
| 13 |                | 1 | 2 | 98  |
| 14 |                | 1 | 2 | 98  |
| 15 | birth          | 1 | 2 | 98  |
| 16 |                | 1 | 2 | 98  |
| 17 |                | 1 | 2 | 98  |
| 18 |                | 1 | 2 | 98  |
| 19 |                | 1 | 2 | 98  |
| 20 |                | 1 | 2 | 98  |
| 21 |                | 1 | 2 | 98  |
| 22 |                | 1 | 2 | 98  |
| 23 | faintness      | 1 | 2 | 98  |
| 24 |                | 1 | 2 | 98  |
| 25 |                | 1 | 2 | 98  |
| 26 |                | 1 | 2 | 98  |
| 27 | et             | 1 | 2 | 98  |
| 28 | lighter        | 1 | 2 | 98  |
| 29 |                |   |   |     |
| 30 | _____          |   |   | 96  |
| 31 |                |   |   |     |
| 32 |                |   |   |     |
| 33 |                |   |   |     |
| 34 |                |   |   |     |
| 35 |                |   |   |     |
| 36 |                |   |   |     |
| 37 |                |   |   |     |
| 38 |                | Y | N | D/K |
| 39 |                | 1 | 2 | 98  |
| 40 | ight           | 1 | 2 | 98  |
| 41 | ht             | 1 | 2 | 98  |
| 42 |                | 1 | 2 | 98  |
| 43 |                | 1 | 2 | 98  |
| 44 | le             |   |   |     |
| 45 |                | 1 | 2 | 98  |
| 46 |                |   |   |     |
| 47 |                |   |   |     |
| 48 | s              | 1 | 2 | 98  |
| 49 | above 37.5 C)  | 1 | 2 | 98  |
| 50 | 5.4 C or less) |   |   |     |
| 51 |                | 1 | 2 | 98  |
| 52 |                | 1 | 2 | 98  |
| 53 | since birth    | 1 | 2 | 98  |
| 54 |                | 1 | 2 | 98  |
| 55 |                | 1 | 2 | 98  |
| 56 | breaths or     | 1 | 2 | 98  |
| 57 | unt)           |   |   |     |
| 58 |                | 1 | 2 | 98  |
| 59 | stimulation,   | 1 | 2 | 98  |
| 60 |                |   |   |     |



1  
2  
3  
4  
5  
6  
7  
8  
9  
10  
11  
12  
13  
14  
15  
16  
17  
18  
19  
20  
21  
22  
23  
24  
25  
26  
27  
28  
29  
30  
31  
32  
33  
34  
35  
36  
37  
38  
39  
40  
41  
42  
43  
44  
45  
46  
47  
48  
49  
50  
51  
52  
53  
54  
55  
56  
57  
58  
59  
60

|                 |          |   |            |
|-----------------|----------|---|------------|
| men             |          |   |            |
| ion:            | 1        | 2 | 98         |
| aining pus,     |          |   |            |
| training pus.   |          |   |            |
| ss              | 1        | 2 | 98         |
| _____           |          |   | 96         |
| <hr/>           |          |   |            |
| cks             |          |   |            |
|                 |          |   |            |
| or danger signs |          |   |            |
| <hr/>           |          |   |            |
| <hr/>           |          |   |            |
| H registers     |          |   | 1          |
| mobile          |          |   |            |
| s               |          |   | 2          |
|                 |          |   | 96         |
| <hr/>           |          |   |            |
| seling cards    |          |   | 1          |
|                 |          |   | 2          |
| fer             |          |   | 3          |
|                 |          |   | 4          |
|                 |          |   | 98         |
| _____           |          |   | 96         |
| <hr/>           |          |   |            |
| .....           |          |   | 1          |
| .....           |          |   | 2          |
| .....           |          |   | 98         |
| <hr/>           |          |   |            |
|                 | <b>N</b> |   | <b>D/K</b> |
|                 | 2        |   | 98         |
|                 | 2        |   | 98         |
| <hr/>           |          |   |            |
|                 |          |   |            |

1  
2  
3  
4  
5  
6  
7  
8  
9  
10  
11  
12  
13  
14  
15  
16  
17  
18  
19  
20  
21  
22  
23  
24  
25  
26  
27  
28  
29  
30  
31  
32  
33  
34  
35  
36  
37  
38  
39  
40  
41  
42  
43  
44  
45  
46  
47  
48  
49  
50  
51  
52  
53  
54  
55  
56  
57  
58  
59  
60

|        |                      |
|--------|----------------------|
| s      | <input type="text"/> |
| ger    | <input type="text"/> |
| trials | <input type="text"/> |
| s at   | <input type="text"/> |
| _____  | 96                   |
| .....  | 1                    |
| .....  | 2                    |

**END THE INTERVIEW**

**RESPONDENT**

|                      |                      |                      |                      |
|----------------------|----------------------|----------------------|----------------------|
| _____                |                      |                      |                      |
| _____                |                      |                      |                      |
| _____                |                      |                      |                      |
| <input type="text"/> | <input type="text"/> | <input type="text"/> | <input type="text"/> |

For peer review only
