# Supplementary material for: The role of a decision-support smartphone application in enhancing community health volunteers’ effectiveness to improve maternal and newborn outcomes in Nairobi, Kenya: quasi-experimental research protocol
Source: PubMed Central journal article supplement — BMJ Open. 2017 Jul 20;7(7):e014896. doi: 10.1136/bmjopen-2016-014896 (PMC5642658; doi:10.1136/bmjopen-2016-014896), 2017-07-20
Supplement: bmjopen-2016-014896supp001.pdf [file bmjopen-2016-014896supp001.pdf]

**Using a Decision-Support Smartphone application to enhance Community Health Volunteers' effectiveness in reducing Maternal complications and reducing Newborn Deaths in the informal settlements of Nairobi, Kenya**

Project Title

| Objectively Verifiable Indicators                                                           |                                                                                             |                                                                                                                                                                                                                                                                                                                                          |
|---------------------------------------------------------------------------------------------|---------------------------------------------------------------------------------------------|------------------------------------------------------------------------------------------------------------------------------------------------------------------------------------------------------------------------------------------------------------------------------------------------------------------------------------------|
| Domain of inquiry                                                                           | Indicators                                                                                  | Method of calculation                                                                                                                                                                                                                                                                                                                    |
| 1. Assess the feasibility and acceptability of using a decision-support module of mPAMANECH | Percentage time for which the system is down on a monthly basis                             | <b>(Numerator:</b> Number of times (in minutes) when the system is down<br><b>Denominator:</b> Total active time in a month. Down time defined as 30 minutes of hanging and Active time as time without hitches) * 100                                                                                                                   |
|                                                                                             | Number of CHVs effectively using the decision support tool                                  | <b>Numerator:</b> Number of CHVs able to either correctly refer or manage clients at home (target is 50 CHVs).<br>Within the system, on a quarterly basis we will be able to generate reports on decisions made by the CHVs. These will also be compared to the control site that will only have a paper based system of data collection |
|                                                                                             | Proportion of CHVs able to identify at least 4 danger signs among neonates                  | <b>Numerator:</b> Number of CHVs able to identify at least 4 danger signs among neonates (aged upto 28 days). <b>Denominator:</b> Total number of CHVs in the selected CUs (total 50 CHVs).                                                                                                                                              |
|                                                                                             | Proportion of CHVs able to identify at least 2 post-partum complications                    | <b>Numerator:</b> Number of CHVs able to identify at least 2 post-partum complications. <b>Denominator :</b> Total number of CHVs in selected Cus (total 50 CHVs)                                                                                                                                                                        |
|                                                                                             | Percentage of correct referral decisions by CHVs for post-partum mothers with complications | <b>(Numerator:</b> Number of correct referrals by CHVs for post-partum mothers with complications. <b>Denominator:</b> Total number of postpartum women referred. )*100                                                                                                                                                                  |

|                                                                                           |                                                                                                     |                                                                                                                                                                                                       |
|-------------------------------------------------------------------------------------------|-----------------------------------------------------------------------------------------------------|-------------------------------------------------------------------------------------------------------------------------------------------------------------------------------------------------------|
|                                                                                           | Percentage of correct referral decisions by CHVs for neonates (aged upto 28 days) with danger signs | <b>(Numerator:</b> number of correct referrals by CHVs for neonates (aged upto 28 days) with danger signs. <b>Denominator:</b> Total number of neonate referrals)*100                                 |
|                                                                                           | Proportion of pregnant women referred for ANC by CHVs                                               | <b>Numerator:</b> Number of pregnant women referred for ANC to selected health facilities by CHVs <b>Denominator:</b> Total number of women-pregnant seen by CHVs                                     |
|                                                                                           | Proportion of mothers referred for PNC by CHVs                                                      | <b>Numerator:</b> Number of post-delivery women referred for PNC to selected health facilities by CHVs. <b>Denominator:</b> Total number of deliveries in selected facilities and at home             |
| <b>2. Determine the decision-support platform's effect on utilization of MNH services</b> |                                                                                                     |                                                                                                                                                                                                       |
|                                                                                           | Proportion of women attending at least 4 ANC's                                                      | <b>Numerator:</b> Number of pregnant women attending 4 or more ANC visits in project sites. <b>Denominator:</b> Total number of pregnant women seeking ANC services in the selected health facilities |
|                                                                                           | Proportion of all mothers attending at least 2 PNC's                                                | <b>Numerator:</b> Number of mothers attending at least 2 PNC's in project sites. <b>Denominator:</b> Total number of postpartum women seeking PNC services in the selected health facilities.         |
|                                                                                           | Proportion of deliveries assisted by trained personnel                                              | <b>Numerator:</b> Number of assisted deliveries by trained personnel (at home or at the facility). <b>Denominator:</b> Total number of deliveries in the facilities and CUs covered by project        |
|                                                                                           | Percentage of women who accessed first ANC within the 1st trimester                                 | <b>(Numerator:</b> Number of women attending the first ANC within the first semester. <b>Denominator:</b> Total number of women attending ANC in project sites)*100                                   |
|                                                                                           | Proportion of women referred by CHVs for post-partum family planning                                | <b>Numerator:</b> Number of post-partum women referred and seen at facilities for family planning. <b>Denominator:</b> Total number of women referred in the facilities and Cus in project sites      |
|                                                                                           | Proportion of newborns (aged upto 28 days) with atleast one danger sign referred by CHV             | <b>Numerator:</b> Number of CHVs able to identify at least 4 danger signs among neonates (aged upto 28 days). <b>Denominator:</b> Total number of CHVs in the selected CUs (total 50 CHVs).           |

|  |                                                                  |                                                                                                                                                                                         |
|--|------------------------------------------------------------------|-----------------------------------------------------------------------------------------------------------------------------------------------------------------------------------------|
|  | Proportion of low birth weight newborns (< 2500g) referred       | <b>Numerator:</b> Number of low birth weight newborns (< 2500g) referred to selected health facilities. <b>Denominator:</b> Total number of live birth weighted in selected facilities  |
|  | Proportion of women lost during follow up                        | <b>Numerator:</b> Number of women referred by CHVs who fail to report to the selected facilities. <b>Denominator:</b> Total number of women referred by CHV                             |
|  | Proportion of newborns (aged upto 28 days) lost during follow up | <b>Numerator:</b> Number of newborns (aged upto 28days) who failed to report to selected facilities. <b>Denominator :</b> Total number of newborns (aged upto 28 days) referred by CHVs |
