# Supplementary material for: The role of a decision-support smartphone application in enhancing community health volunteers’ effectiveness to improve maternal and newborn outcomes in Nairobi, Kenya: quasi-experimental research protocol
Source: PubMed Central journal article supplement — BMJ Open. 2017 Jul 20;7(7):e014896. doi: 10.1136/bmjopen-2016-014896 (PMC5642658; doi:10.1136/bmjopen-2016-014896), 2017-07-20
Supplement: bmjopen-2016-014896supp003.pdf [file bmjopen-2016-014896supp003.pdf]

**AFRICAN POPULATION AND HEALTH RESEARCH CENTER**

**HEALTH CHALLENGES AND SYSTEMS PROGRAM**

Using a Decision-Support Smartphone application to enhance Community Health Volunteers' effectiveness in reducing Maternal complications and reducing Newborn Deaths in the informal settlements of Nairobi, Kenya

*Questionnaire for community health volunteers*

|  |                                        |                                          |                      |                      |                      |
|--|----------------------------------------|------------------------------------------|----------------------|----------------------|----------------------|
|  | START TIME (24hrs Format)              | <input type="text"/>                     | <input type="text"/> | <input type="text"/> | <input type="text"/> |
|  | DATE OF INTERVIEW (DD/MM/YYYY)         | <input type="text"/>                     | <input type="text"/> | <input type="text"/> | <input type="text"/> |
|  | FIs CODE                               | <input type="text"/>                     | <input type="text"/> | <input type="text"/> | <input type="text"/> |
|  | NAME OF CHV                            | <input style="width:100%;" type="text"/> |                      |                      |                      |
|  | COMMUNITY HEALTH UNIT CHV IS LINKED TO | <input style="width:100%;" type="text"/> |                      |                      |                      |
|  | HEALTH FACILITY CHV IS LINKED TO       | <input style="width:100%;" type="text"/> |                      |                      |                      |

**1 BACKGROUND**

|            |                                                                 |                               |                      |                      |                      |                      |
|------------|-----------------------------------------------------------------|-------------------------------|----------------------|----------------------|----------------------|----------------------|
| <b>1.1</b> | RESPONDENT'S DATE OF BIRTH (DD/MM/YYYY)                         | <input type="text"/>          | <input type="text"/> | <input type="text"/> | <input type="text"/> | <input type="text"/> |
| <b>1.2</b> | RESPONDENT'S AGE (COMPLETED YEARS)                              | <input type="text"/>          | <input type="text"/> | <input type="text"/> | <input type="text"/> |                      |
| <b>1.3</b> | Have you ever attended school?                                  | YES.....                      | <b>01</b>            |                      |                      | <b>1.5</b>           |
|            |                                                                 | NO.....                       | <b>02</b>            |                      |                      |                      |
| <b>1.4</b> | What is the highest level of education that you have completed? | Pre-school                    | <b>0</b>             |                      |                      |                      |
|            |                                                                 | Primary school .....          | <b>01</b>            |                      |                      |                      |
|            |                                                                 | Secondary .....               | <b>02</b>            |                      |                      |                      |
|            |                                                                 | College (Certificate/Diploma) | <b>03</b>            |                      |                      |                      |
|            |                                                                 | Undergraduate                 | <b>04</b>            |                      |                      |                      |
|            |                                                                 | Postgraduate (Master/PHd)     | <b>05</b>            |                      |                      |                      |
| <b>1.5</b> | Highest class/form/year completed                               | <input type="checkbox"/>      |                      |                      |                      |                      |

**2.0 COMMUNITY SERVICES**  
**I would like us to discuss about the community services you are involved in, some questions might require you to refer to your registers**

|            |                                                                                                                               |                                                                  |           |  |  |  |
|------------|-------------------------------------------------------------------------------------------------------------------------------|------------------------------------------------------------------|-----------|--|--|--|
| <b>2.1</b> | How many years have you served this community as a community health volunteer (CHV)?                                          | Less than 1 year.....                                            | <b>01</b> |  |  |  |
|            |                                                                                                                               | 1 - 2 years.....                                                 | <b>02</b> |  |  |  |
|            |                                                                                                                               | 2 - 4 years.....                                                 | <b>03</b> |  |  |  |
|            |                                                                                                                               | More than 5 years.....                                           | <b>04</b> |  |  |  |
| <b>2.2</b> | As a CHV, what are your roles?<br><br><i>FW instructions:<br/>Circle All that apply<br/>Do not Prompt or read the options</i> | HH Health education on<br>Proper nutrition during pregnancy..... | <b>A</b>  |  |  |  |
|            |                                                                                                                               | Breast feeding.....                                              | <b>B</b>  |  |  |  |
|            |                                                                                                                               | Birth plan.....                                                  | <b>C</b>  |  |  |  |
|            |                                                                                                                               | Health facility based delivery.....                              | <b>D</b>  |  |  |  |
|            |                                                                                                                               | ANC.....                                                         | <b>E</b>  |  |  |  |
|            |                                                                                                                               | PNC for mother .....                                             | <b>F</b>  |  |  |  |
|            |                                                                                                                               | Vaccination.....                                                 | <b>G</b>  |  |  |  |
|            |                                                                                                                               | Danger signs in pregnancy.....                                   | <b>H</b>  |  |  |  |
|            |                                                                                                                               | Danger signs in postnatal period.....                            | <b>I</b>  |  |  |  |
|            |                                                                                                                               | Danger signs in newborns.....                                    | <b>J</b>  |  |  |  |
|            |                                                                                                                               | Height measurments.....                                          | <b>K</b>  |  |  |  |
|            |                                                                                                                               | Weight measurements.....                                         | <b>L</b>  |  |  |  |
|            |                                                                                                                               | Referrals.....                                                   | <b>M</b>  |  |  |  |
|            |                                                                                                                               | Growth monitoring of children.....                               | <b>N</b>  |  |  |  |
|            |                                                                                                                               | Distribution of FP commodities.....                              | <b>O</b>  |  |  |  |
|            |                                                                                                                               | Community mobilization.....                                      | <b>P</b>  |  |  |  |
|            |                                                                                                                               | Home based care services.....                                    | <b>Q</b>  |  |  |  |
|            |                                                                                                                               | Others (Specify).....                                            | <b>96</b> |  |  |  |

|                                                                                                                                                                       |                                                                                                                                                                                        |                                                                                                                                                                                                                                                                                                                                                                                                                             |                                                                                                                                                                                                                                                                                                                                                                                                                   |
|-----------------------------------------------------------------------------------------------------------------------------------------------------------------------|----------------------------------------------------------------------------------------------------------------------------------------------------------------------------------------|-----------------------------------------------------------------------------------------------------------------------------------------------------------------------------------------------------------------------------------------------------------------------------------------------------------------------------------------------------------------------------------------------------------------------------|-------------------------------------------------------------------------------------------------------------------------------------------------------------------------------------------------------------------------------------------------------------------------------------------------------------------------------------------------------------------------------------------------------------------|
| 2.3                                                                                                                                                                   | How many households are allocated /assigned to you?                                                                                                                                    | <input type="text"/> <input type="text"/> <input type="text"/>                                                                                                                                                                                                                                                                                                                                                              |                                                                                                                                                                                                                                                                                                                                                                                                                   |
| 2.4                                                                                                                                                                   | In the allocated households in Qn 2.3, how many have?<br><br><i>FW Instruction:<br/>Ask about the number of subjects in each category</i>                                              | Non pregnant women (15 to 49 years)<br>Pregnant women<br>How many of the pregnant women can be categorized as having high risk pregnancies<br>Newborns (0-28 days)<br>Infants (29 days to 11 months)<br>Children (12 months to 5 years)                                                                                                                                                                                     | <input type="text"/><br><input type="text"/><br><input type="text"/><br><input type="text"/><br><input type="text"/><br><input type="text"/>                                                                                                                                                                                                                                                                      |
| <b>NOW, I would like us to discuss about services that you have offered in the last one month.<br/>Some questions may require you refer to your records/registers</b> |                                                                                                                                                                                        |                                                                                                                                                                                                                                                                                                                                                                                                                             |                                                                                                                                                                                                                                                                                                                                                                                                                   |
| <b>Reference month</b> _____                                                                                                                                          |                                                                                                                                                                                        |                                                                                                                                                                                                                                                                                                                                                                                                                             |                                                                                                                                                                                                                                                                                                                                                                                                                   |
| 2.5                                                                                                                                                                   | How many of the following have you visited in the last one month                                                                                                                       | Non pregnant women (15 to 49 years)<br>Pregnant women<br>Newborns (0-28 days)<br>Infants (29 days to 11 months)<br>Children (12 months to 5 years)                                                                                                                                                                                                                                                                          | <input type="text"/><br><input type="text"/><br><input type="text"/><br><input type="text"/><br><input type="text"/>                                                                                                                                                                                                                                                                                              |
| 2.6                                                                                                                                                                   | In the last month, how many women have you referred to the nearest facility for the following services<br><br><b>FW INSTRUCTIONS :ANC &gt;0 ask QN 2.7<br/>The rest skip to qn 2.8</b> | Family planning<br>Pregnancy tests<br>ANC<br>Pregnancy danger signs<br>Facility based devliver<br>PNC for mothers<br>Postpartum women with danger signs<br>Women with high risk pregnancies                                                                                                                                                                                                                                 | <input type="text"/> <input type="text"/><br><input type="text"/> <input type="text"/> |
| 2.7                                                                                                                                                                   | Among the women you referred for ANC in the last one month, how many were for                                                                                                          | 1st ANC visits<br>At least 4th ANC visits                                                                                                                                                                                                                                                                                                                                                                                   | <input type="text"/> <input type="text"/><br><input type="text"/> <input type="text"/>                                                                                                                                                                                                                                                                                                                            |
| 2.8                                                                                                                                                                   | Kindly identify danger signs in pregnant women<br><br><i>FW instructions:<br/>Circle All mentioned<br/>Do not Prompt or read the options</i>                                           | High fever<br>Vaginal bleeding<br>Baby not moving<br>Weight loss<br>Swelling in hands or feet<br>Bad headache<br>High blood Pressure<br>Blurred vision<br>Severe abdominal pains<br>Difficulty breathing<br>Painful urination<br>Convulsions/fits<br>Loss of consciousness<br>Heavy vaginal discharge<br>A lot of vomiting<br>Very pale palms of hands or nail bed<br>Genital ulcers<br>Do not know<br>Other, specify _____ | <b>A</b><br><b>B</b><br><b>C</b><br><b>D</b><br><b>E</b><br><b>F</b><br><b>G</b><br><b>H</b><br><b>U</b><br><b>J</b><br><b>K</b><br><b>L</b><br><b>M</b><br><b>N</b><br><b>O</b><br><b>P</b><br><b>Q</b><br><b>98</b><br><b>96</b>                                                                                                                                                                                |
| 2.9                                                                                                                                                                   | Kindly identify danger signs in postpartum women<br><br><i>FW instructions:<br/>Circle All mentioned<br/>Do not Prompt or read the options</i>                                         | Fever without chills<br>Fever with chills<br>Heavy bleeding after birth<br>Bad abdominal pain<br>High blood pressure                                                                                                                                                                                                                                                                                                        | <b>A</b><br><b>B</b><br><b>C</b><br><b>D</b><br><b>E</b>                                                                                                                                                                                                                                                                                                                                                          |

|                                           |                                                                                                                                                                                             | Convulsions <b>F</b><br>Abnormal discharge <b>G</b><br>Loss of consciousness <b>H</b><br>Headaches, dizziness/faintness <b>I</b><br>Blurry vision <b>J</b><br>Difficulty breathing <b>K</b><br>Difficulty passing urine <b>L</b><br>Palm of hands and feet lighter than normal <b>M</b><br>Other (Specify) _____ <b>96</b>                                                                                                                                                                                                                                                                                                                                                                                                                                                                                                                                                                                                                                                                                                                                                                                                                                                                                                                                                                                                                                                                                                                                                                                                                                                                                                                                                      |     |   |   |     |                                           |   |   |    |                      |   |   |    |                    |   |   |    |                     |   |   |    |                               |   |   |    |                               |   |   |    |                          |   |   |    |                           |   |   |    |
|-------------------------------------------|---------------------------------------------------------------------------------------------------------------------------------------------------------------------------------------------|---------------------------------------------------------------------------------------------------------------------------------------------------------------------------------------------------------------------------------------------------------------------------------------------------------------------------------------------------------------------------------------------------------------------------------------------------------------------------------------------------------------------------------------------------------------------------------------------------------------------------------------------------------------------------------------------------------------------------------------------------------------------------------------------------------------------------------------------------------------------------------------------------------------------------------------------------------------------------------------------------------------------------------------------------------------------------------------------------------------------------------------------------------------------------------------------------------------------------------------------------------------------------------------------------------------------------------------------------------------------------------------------------------------------------------------------------------------------------------------------------------------------------------------------------------------------------------------------------------------------------------------------------------------------------------|-----|---|---|-----|-------------------------------------------|---|---|----|----------------------|---|---|----|--------------------|---|---|----|---------------------|---|---|----|-------------------------------|---|---|----|-------------------------------|---|---|----|--------------------------|---|---|----|---------------------------|---|---|----|
| <b>2.10 a</b>                             | In the last 3 months, how many of the following have you referred with the following ?                                                                                                      | Pregnancy danger signs <table border="1" style="display: inline-table; vertical-align: middle;"><tr><td></td><td></td></tr></table><br>Women with high risk pregnancies <table border="1" style="display: inline-table; vertical-align: middle;"><tr><td></td><td></td></tr></table><br>Post-partum women                                                                                                                                                                                                                                                                                                                                                                                                                                                                                                                                                                                                                                                                                                                                                                                                                                                                                                                                                                                                                                                                                                                                                                                                                                                                                                                                                                       |     |   |   |     |                                           |   |   |    |                      |   |   |    |                    |   |   |    |                     |   |   |    |                               |   |   |    |                               |   |   |    |                          |   |   |    |                           |   |   |    |
|                                           |                                                                                                                                                                                             |                                                                                                                                                                                                                                                                                                                                                                                                                                                                                                                                                                                                                                                                                                                                                                                                                                                                                                                                                                                                                                                                                                                                                                                                                                                                                                                                                                                                                                                                                                                                                                                                                                                                                 |     |   |   |     |                                           |   |   |    |                      |   |   |    |                    |   |   |    |                     |   |   |    |                               |   |   |    |                               |   |   |    |                          |   |   |    |                           |   |   |    |
|                                           |                                                                                                                                                                                             |                                                                                                                                                                                                                                                                                                                                                                                                                                                                                                                                                                                                                                                                                                                                                                                                                                                                                                                                                                                                                                                                                                                                                                                                                                                                                                                                                                                                                                                                                                                                                                                                                                                                                 |     |   |   |     |                                           |   |   |    |                      |   |   |    |                    |   |   |    |                     |   |   |    |                               |   |   |    |                               |   |   |    |                          |   |   |    |                           |   |   |    |
| <b>2.10 b</b>                             | Would you categorize pregnant women with the following conditions as having high risk pregnancies.<br><br><i>FW Instructions: Read out the options.</i><br><i>Multiple response allowed</i> | <table style="width: 100%; border-collapse: collapse;"> <thead> <tr> <th style="width: 80%;"></th> <th style="width: 5%; text-align: center;">Y</th> <th style="width: 5%; text-align: center;">N</th> <th style="width: 10%; text-align: center;">D/K</th> </tr> </thead> <tbody> <tr> <td>Carrying twins and higher-order multiples</td> <td style="text-align: center;">1</td> <td style="text-align: center;">2</td> <td style="text-align: center;">98</td> </tr> <tr> <td>Gestational diabetes</td> <td style="text-align: center;">1</td> <td style="text-align: center;">2</td> <td style="text-align: center;">98</td> </tr> <tr> <td>HIV positive women</td> <td style="text-align: center;">1</td> <td style="text-align: center;">2</td> <td style="text-align: center;">98</td> </tr> <tr> <td>High blood pressure</td> <td style="text-align: center;">1</td> <td style="text-align: center;">2</td> <td style="text-align: center;">98</td> </tr> <tr> <td>Pregnancy in teens &lt; 17 years</td> <td style="text-align: center;">1</td> <td style="text-align: center;">2</td> <td style="text-align: center;">98</td> </tr> <tr> <td>Pregnancy in women &gt; 35 years</td> <td style="text-align: center;">1</td> <td style="text-align: center;">2</td> <td style="text-align: center;">98</td> </tr> <tr> <td>Overweights/ obese women</td> <td style="text-align: center;">1</td> <td style="text-align: center;">2</td> <td style="text-align: center;">98</td> </tr> <tr> <td>History of miscarriage(s)</td> <td style="text-align: center;">1</td> <td style="text-align: center;">2</td> <td style="text-align: center;">98</td> </tr> </tbody> </table> |     | Y | N | D/K | Carrying twins and higher-order multiples | 1 | 2 | 98 | Gestational diabetes | 1 | 2 | 98 | HIV positive women | 1 | 2 | 98 | High blood pressure | 1 | 2 | 98 | Pregnancy in teens < 17 years | 1 | 2 | 98 | Pregnancy in women > 35 years | 1 | 2 | 98 | Overweights/ obese women | 1 | 2 | 98 | History of miscarriage(s) | 1 | 2 | 98 |
|                                           | Y                                                                                                                                                                                           | N                                                                                                                                                                                                                                                                                                                                                                                                                                                                                                                                                                                                                                                                                                                                                                                                                                                                                                                                                                                                                                                                                                                                                                                                                                                                                                                                                                                                                                                                                                                                                                                                                                                                               | D/K |   |   |     |                                           |   |   |    |                      |   |   |    |                    |   |   |    |                     |   |   |    |                               |   |   |    |                               |   |   |    |                          |   |   |    |                           |   |   |    |
| Carrying twins and higher-order multiples | 1                                                                                                                                                                                           | 2                                                                                                                                                                                                                                                                                                                                                                                                                                                                                                                                                                                                                                                                                                                                                                                                                                                                                                                                                                                                                                                                                                                                                                                                                                                                                                                                                                                                                                                                                                                                                                                                                                                                               | 98  |   |   |     |                                           |   |   |    |                      |   |   |    |                    |   |   |    |                     |   |   |    |                               |   |   |    |                               |   |   |    |                          |   |   |    |                           |   |   |    |
| Gestational diabetes                      | 1                                                                                                                                                                                           | 2                                                                                                                                                                                                                                                                                                                                                                                                                                                                                                                                                                                                                                                                                                                                                                                                                                                                                                                                                                                                                                                                                                                                                                                                                                                                                                                                                                                                                                                                                                                                                                                                                                                                               | 98  |   |   |     |                                           |   |   |    |                      |   |   |    |                    |   |   |    |                     |   |   |    |                               |   |   |    |                               |   |   |    |                          |   |   |    |                           |   |   |    |
| HIV positive women                        | 1                                                                                                                                                                                           | 2                                                                                                                                                                                                                                                                                                                                                                                                                                                                                                                                                                                                                                                                                                                                                                                                                                                                                                                                                                                                                                                                                                                                                                                                                                                                                                                                                                                                                                                                                                                                                                                                                                                                               | 98  |   |   |     |                                           |   |   |    |                      |   |   |    |                    |   |   |    |                     |   |   |    |                               |   |   |    |                               |   |   |    |                          |   |   |    |                           |   |   |    |
| High blood pressure                       | 1                                                                                                                                                                                           | 2                                                                                                                                                                                                                                                                                                                                                                                                                                                                                                                                                                                                                                                                                                                                                                                                                                                                                                                                                                                                                                                                                                                                                                                                                                                                                                                                                                                                                                                                                                                                                                                                                                                                               | 98  |   |   |     |                                           |   |   |    |                      |   |   |    |                    |   |   |    |                     |   |   |    |                               |   |   |    |                               |   |   |    |                          |   |   |    |                           |   |   |    |
| Pregnancy in teens < 17 years             | 1                                                                                                                                                                                           | 2                                                                                                                                                                                                                                                                                                                                                                                                                                                                                                                                                                                                                                                                                                                                                                                                                                                                                                                                                                                                                                                                                                                                                                                                                                                                                                                                                                                                                                                                                                                                                                                                                                                                               | 98  |   |   |     |                                           |   |   |    |                      |   |   |    |                    |   |   |    |                     |   |   |    |                               |   |   |    |                               |   |   |    |                          |   |   |    |                           |   |   |    |
| Pregnancy in women > 35 years             | 1                                                                                                                                                                                           | 2                                                                                                                                                                                                                                                                                                                                                                                                                                                                                                                                                                                                                                                                                                                                                                                                                                                                                                                                                                                                                                                                                                                                                                                                                                                                                                                                                                                                                                                                                                                                                                                                                                                                               | 98  |   |   |     |                                           |   |   |    |                      |   |   |    |                    |   |   |    |                     |   |   |    |                               |   |   |    |                               |   |   |    |                          |   |   |    |                           |   |   |    |
| Overweights/ obese women                  | 1                                                                                                                                                                                           | 2                                                                                                                                                                                                                                                                                                                                                                                                                                                                                                                                                                                                                                                                                                                                                                                                                                                                                                                                                                                                                                                                                                                                                                                                                                                                                                                                                                                                                                                                                                                                                                                                                                                                               | 98  |   |   |     |                                           |   |   |    |                      |   |   |    |                    |   |   |    |                     |   |   |    |                               |   |   |    |                               |   |   |    |                          |   |   |    |                           |   |   |    |
| History of miscarriage(s)                 | 1                                                                                                                                                                                           | 2                                                                                                                                                                                                                                                                                                                                                                                                                                                                                                                                                                                                                                                                                                                                                                                                                                                                                                                                                                                                                                                                                                                                                                                                                                                                                                                                                                                                                                                                                                                                                                                                                                                                               | 98  |   |   |     |                                           |   |   |    |                      |   |   |    |                    |   |   |    |                     |   |   |    |                               |   |   |    |                               |   |   |    |                          |   |   |    |                           |   |   |    |
| <b>2.11</b>                               | Kindly identify danger signs in newborns<br><br><i>FW instructions:</i><br><i>Circle All mentioned</i><br><i>Do not Prompt or read the options</i>                                          | Preterm birth <b>A</b><br>Preterm lowbirth weight <b>B</b><br>Term lowbirth weight <b>C</b><br>Jaundice <b>D</b><br>Skin in palm and sole of feet turn blue <b>E</b><br>Yellow sole <b>G</b><br>Breathing difficulties <b>H</b><br>Fever ( temperature above 37.5 C) <b>I</b><br>Low temperature ( 35.4 C or less) <b>J</b><br>Lethargy <b>K</b><br>Failure to feed <b>L</b><br>Convulsions or fits since birth <b>M</b><br>Drowsy <b>N</b><br>Fast breathing ( 60 breaths or more in 1 minute count) <b>O</b><br>Chest indrawing <b>P</b><br>Movement only on stimulation, or no movement even on stimulation <b>Q</b><br>Signs of local infection: umbilicus red or draining pus, skin boils and eyes draining pus. <b>R</b><br>Excessive weight loss <b>S</b><br>Interneet<br>Other (Specify) _____                                                                                                                                                                                                                                                                                                                                                                                                                                                                                                                                                                                                                                                                                                                                                                                                                                                                          |     |   |   |     |                                           |   |   |    |                      |   |   |    |                    |   |   |    |                     |   |   |    |                               |   |   |    |                               |   |   |    |                          |   |   |    |                           |   |   |    |
| <b>2.12</b>                               | In the last 3 months, how many newborns have you referred to the nearest health facility for the following services                                                                         | Routine medical checks <table border="1" style="display: inline-table; vertical-align: middle;"><tr><td></td><td></td></tr></table><br>Vaccinations <table border="1" style="display: inline-table; vertical-align: middle;"><tr><td></td><td></td></tr></table><br>Seek medical care for danger signs <table border="1" style="display: inline-table; vertical-align: middle;"><tr><td></td><td></td></tr></table>                                                                                                                                                                                                                                                                                                                                                                                                                                                                                                                                                                                                                                                                                                                                                                                                                                                                                                                                                                                                                                                                                                                                                                                                                                                             |     |   |   |     |                                           |   |   |    |                      |   |   |    |                    |   |   |    |                     |   |   |    |                               |   |   |    |                               |   |   |    |                          |   |   |    |                           |   |   |    |
|                                           |                                                                                                                                                                                             |                                                                                                                                                                                                                                                                                                                                                                                                                                                                                                                                                                                                                                                                                                                                                                                                                                                                                                                                                                                                                                                                                                                                                                                                                                                                                                                                                                                                                                                                                                                                                                                                                                                                                 |     |   |   |     |                                           |   |   |    |                      |   |   |    |                    |   |   |    |                     |   |   |    |                               |   |   |    |                               |   |   |    |                          |   |   |    |                           |   |   |    |
|                                           |                                                                                                                                                                                             |                                                                                                                                                                                                                                                                                                                                                                                                                                                                                                                                                                                                                                                                                                                                                                                                                                                                                                                                                                                                                                                                                                                                                                                                                                                                                                                                                                                                                                                                                                                                                                                                                                                                                 |     |   |   |     |                                           |   |   |    |                      |   |   |    |                    |   |   |    |                     |   |   |    |                               |   |   |    |                               |   |   |    |                          |   |   |    |                           |   |   |    |
|                                           |                                                                                                                                                                                             |                                                                                                                                                                                                                                                                                                                                                                                                                                                                                                                                                                                                                                                                                                                                                                                                                                                                                                                                                                                                                                                                                                                                                                                                                                                                                                                                                                                                                                                                                                                                                                                                                                                                                 |     |   |   |     |                                           |   |   |    |                      |   |   |    |                    |   |   |    |                     |   |   |    |                               |   |   |    |                               |   |   |    |                          |   |   |    |                           |   |   |    |

|                                                                                                                                                                                                                                                                                   |                                                                                                                                                               |                                                                                                                                                                                                                                                                                                                                |                              |                                 |                      |                      |                      |    |             |   |    |  |
|-----------------------------------------------------------------------------------------------------------------------------------------------------------------------------------------------------------------------------------------------------------------------------------|---------------------------------------------------------------------------------------------------------------------------------------------------------------|--------------------------------------------------------------------------------------------------------------------------------------------------------------------------------------------------------------------------------------------------------------------------------------------------------------------------------|------------------------------|---------------------------------|----------------------|----------------------|----------------------|----|-------------|---|----|--|
| 3.0                                                                                                                                                                                                                                                                               | <b>DATA DOCUMENTATION</b><br>Now I would like us to discuss about how you currently collect data                                                              |                                                                                                                                                                                                                                                                                                                                |                              |                                 |                      |                      |                      |    |             |   |    |  |
| 3.1                                                                                                                                                                                                                                                                               | How do you collect data during home visits                                                                                                                    | Manually using MOH registers<br>Electronically using mobile or electronic devices<br>Others specify                                                                                                                                                                                                                            | 1<br>2<br>96                 |                                 |                      |                      |                      |    |             |   |    |  |
| 3.2                                                                                                                                                                                                                                                                               | How do you determine if a woman/newborn has a danger sign and needs urgent medical attention ?                                                                | By referring to counseling cards<br>From memory<br>I call someone to refer<br>I guess<br>I don't know<br>Other specify _____                                                                                                                                                                                                   | 1<br>2<br>3<br>4<br>98<br>96 |                                 |                      |                      |                      |    |             |   |    |  |
| 3.3                                                                                                                                                                                                                                                                               | Are you satisfied with the current method of data collection ?                                                                                                | Yes .....<br>No.....<br>D/K.....                                                                                                                                                                                                                                                                                               | 1<br>2<br>98                 |                                 |                      |                      |                      |    |             |   |    |  |
| 3.3 b                                                                                                                                                                                                                                                                             | <i>Why? Elaborate</i>                                                                                                                                         | _____<br>_____<br>_____                                                                                                                                                                                                                                                                                                        |                              |                                 |                      |                      |                      |    |             |   |    |  |
| 3.4                                                                                                                                                                                                                                                                               | Do you think the current method of identifying danger signs in women and newborns is effective and efficient                                                  | <table style="width: 100%; border: none;"> <tr> <td style="text-align: center;"><b>Y</b></td> <td style="text-align: center;"><b>N</b></td> <td style="text-align: center;"><b>D/K</b></td> </tr> <tr> <td>Effective 1</td> <td>2</td> <td>98</td> </tr> <tr> <td>Efficient 1</td> <td>2</td> <td>98</td> </tr> </table>       | <b>Y</b>                     | <b>N</b>                        | <b>D/K</b>           | Effective 1          | 2                    | 98 | Efficient 1 | 2 | 98 |  |
| <b>Y</b>                                                                                                                                                                                                                                                                          | <b>N</b>                                                                                                                                                      | <b>D/K</b>                                                                                                                                                                                                                                                                                                                     |                              |                                 |                      |                      |                      |    |             |   |    |  |
| Effective 1                                                                                                                                                                                                                                                                       | 2                                                                                                                                                             | 98                                                                                                                                                                                                                                                                                                                             |                              |                                 |                      |                      |                      |    |             |   |    |  |
| Efficient 1                                                                                                                                                                                                                                                                       | 2                                                                                                                                                             | 98                                                                                                                                                                                                                                                                                                                             |                              |                                 |                      |                      |                      |    |             |   |    |  |
| 3.5                                                                                                                                                                                                                                                                               | In your opinion, do you think an electronic / mobile data capture system will<br><br><i>Fill with the correct response</i><br>1=Yes<br>2=No<br>98=Do not know | Make work easier <input type="checkbox"/><br>Shorten time in HHs <input type="checkbox"/><br>Assist in correct identification of danger signs <input type="checkbox"/><br>Increase timely referrals <input type="checkbox"/><br>Reduce misdiagnosis at community level <input type="checkbox"/><br><br>Others specify _____ 96 |                              |                                 |                      |                      |                      |    |             |   |    |  |
| 3.6                                                                                                                                                                                                                                                                               | Have you been trained on mobile /electronic data collection                                                                                                   | Yes.....<br>No.....                                                                                                                                                                                                                                                                                                            | 1<br>2                       |                                 |                      |                      |                      |    |             |   |    |  |
| <b>FW INSTRUCTION : THANK THE PARTICIPANT FOR PARTICIPATION AND END THE INTERVIEW</b><br><br><b>RECORD ANY GENERAL COMMENTS ABOUT THE INTERVIEW/RESPONDENT</b>                                                                                                                    |                                                                                                                                                               |                                                                                                                                                                                                                                                                                                                                |                              |                                 |                      |                      |                      |    |             |   |    |  |
| _____<br>_____                                                                                                                                                                                                                                                                    |                                                                                                                                                               |                                                                                                                                                                                                                                                                                                                                |                              |                                 |                      |                      |                      |    |             |   |    |  |
| <table style="width: 100%; border: none;"> <tr> <td style="width: 70%;"><b>END TIME (24 Hrs Format)</b></td> <td style="width: 10%;"><input type="text"/></td> <td style="width: 10%;"><input type="text"/></td> <td style="width: 10%;"><input type="text"/></td> </tr> </table> |                                                                                                                                                               |                                                                                                                                                                                                                                                                                                                                |                              | <b>END TIME (24 Hrs Format)</b> | <input type="text"/> | <input type="text"/> | <input type="text"/> |    |             |   |    |  |
| <b>END TIME (24 Hrs Format)</b>                                                                                                                                                                                                                                                   | <input type="text"/>                                                                                                                                          | <input type="text"/>                                                                                                                                                                                                                                                                                                           | <input type="text"/>         |                                 |                      |                      |                      |    |             |   |    |  |
